# Supplementary material for: Therapist-guided internet-delivered cognitive–behavioural therapy supplemented with group exposure sessions for adolescents with social anxiety disorder: a feasibility trial
Source: PubMed Central journal article supplement — BMJ Open. 2017 Dec 14;7(12):e018345. doi: 10.1136/bmjopen-2017-018345 (PMC5735402; doi:10.1136/bmjopen-2017-018345), 2017-12-14
Supplement: bmjopen-2017-018345.draft_revisions.pdf [file bmjopen-2017-018345.draft_revisions.pdf]

# BMJ Open

BMJ Open is committed to open peer review. As part of this commitment we make the peer review history of every article we publish publicly available.

When an article is published we post the peer reviewers' comments and the authors' responses online. We also post the versions of the paper that were used during peer review. These are the versions that the peer review comments apply to.

The versions of the paper that follow are the versions that were submitted during the peer review process. They are not the versions of record or the final published versions. They should not be cited or distributed as the published version of this manuscript.

BMJ Open is an open access journal and the full, final, typeset and author-corrected version of record of the manuscript is available on our site with no access controls, subscription charges or pay-per-view fees (<http://bmjopen.bmj.com>).

If you have any questions on BMJ Open's open peer review process please email [editorial.bmjopen@bmj.com](mailto:editorial.bmjopen@bmj.com)

# BMJ Open

## Therapist-guided Internet-delivered cognitive behavioural therapy supplemented with group-exposure sessions for adolescents with social anxiety disorder: a feasibility trial

|                                 |                                                                                                                                                                                                                                                                                                                                                                                                                                                                                                                                                                                                                                                                                                                                                                                                                                                                                                                                                                                                                                                                                                                                                                                                                      |
|---------------------------------|----------------------------------------------------------------------------------------------------------------------------------------------------------------------------------------------------------------------------------------------------------------------------------------------------------------------------------------------------------------------------------------------------------------------------------------------------------------------------------------------------------------------------------------------------------------------------------------------------------------------------------------------------------------------------------------------------------------------------------------------------------------------------------------------------------------------------------------------------------------------------------------------------------------------------------------------------------------------------------------------------------------------------------------------------------------------------------------------------------------------------------------------------------------------------------------------------------------------|
| Journal:                        | <i>BMJ Open</i>                                                                                                                                                                                                                                                                                                                                                                                                                                                                                                                                                                                                                                                                                                                                                                                                                                                                                                                                                                                                                                                                                                                                                                                                      |
| Manuscript ID                   | bmjopen-2017-018345                                                                                                                                                                                                                                                                                                                                                                                                                                                                                                                                                                                                                                                                                                                                                                                                                                                                                                                                                                                                                                                                                                                                                                                                  |
| Article Type:                   | Research                                                                                                                                                                                                                                                                                                                                                                                                                                                                                                                                                                                                                                                                                                                                                                                                                                                                                                                                                                                                                                                                                                                                                                                                             |
| Date Submitted by the Author:   | 21-Jun-2017                                                                                                                                                                                                                                                                                                                                                                                                                                                                                                                                                                                                                                                                                                                                                                                                                                                                                                                                                                                                                                                                                                                                                                                                          |
| Complete List of Authors:       | <p>Nordh, Martina; Karolinska Institutet Department of Clinical Neuroscience, Center for Psychiatry Research; Stockholms Lans Landsting, Stockholm health care services</p> <p>Vigerland, Sarah; Karolinska Institutet Department of Clinical Neuroscience, Center for Psychiatry Research; Stockholms Lans Landsting, Stockholm health care services</p> <p>Öst, Lars-Göran; Stockholms Universitet, Department of psychology; Karolinska Institutet Department of Clinical Neuroscience</p> <p>Ljótsson, Brjánn; Karolinska Institutet Department of Clinical Neuroscience, Center for Psychiatry Research; Stockholms Lans Landsting, Stockholm health care services</p> <p>Mataix-Cols, David; Karolinska Institutet Department of Clinical Neuroscience, Center for Psychiatry Research; Stockholms Lans Landsting, Stockholm health care services</p> <p>Serlachius, Eva; Karolinska Institutet Department of Clinical Neuroscience, Center for Psychiatry Research; Stockholms Lans Landsting, Stockholm health care services</p> <p>Högström, Jens; Karolinska Institutet Department of Clinical Neuroscience, Center for Psychiatry Research; Stockholms Lans Landsting, Stockholm health care services</p> |
| <b>Primary Subject Heading</b>: | Mental health                                                                                                                                                                                                                                                                                                                                                                                                                                                                                                                                                                                                                                                                                                                                                                                                                                                                                                                                                                                                                                                                                                                                                                                                        |
| Secondary Subject Heading:      | Health services research                                                                                                                                                                                                                                                                                                                                                                                                                                                                                                                                                                                                                                                                                                                                                                                                                                                                                                                                                                                                                                                                                                                                                                                             |
| Keywords:                       | Child & adolescent psychiatry < PSYCHIATRY, Anxiety disorders < PSYCHIATRY, MENTAL HEALTH                                                                                                                                                                                                                                                                                                                                                                                                                                                                                                                                                                                                                                                                                                                                                                                                                                                                                                                                                                                                                                                                                                                            |
|                                 |                                                                                                                                                                                                                                                                                                                                                                                                                                                                                                                                                                                                                                                                                                                                                                                                                                                                                                                                                                                                                                                                                                                                                                                                                      |

SCHOLARONE™  
Manuscripts

**Word count**

Abstract: 273

Main text: 4296

Tables: 3 Figures: 2

**Therapist-guided Internet-delivered cognitive behavioural therapy supplemented with group-exposure sessions for adolescents with social anxiety disorder: a feasibility trial**

Martina Nordh<sup>1,2</sup>, Sarah Vigerland<sup>1,2</sup>, Lars-Göran Öst<sup>3,4</sup>, Brjánn Ljótsson<sup>1,4</sup>, David Mataix-Cols<sup>1,2</sup>, Eva Serlachius<sup>1,2</sup>, Jens Högström<sup>1,2</sup>

**Author affiliations:**

<sup>1</sup>Centre for Psychiatry Research, Department of Clinical Neuroscience, Karolinska Institutet, Stockholm, Sweden

<sup>2</sup>Stockholm Health Care Services, Stockholm County Council, Stockholm, Sweden

<sup>3</sup>Department of psychology, Stockholm University, Stockholm, Sweden

<sup>4</sup>Department of Clinical Neuroscience, Division of psychology, Karolinska Institutet, Stockholm, Sweden

**Correspondance to:**

Martina Nordh

E-mail: [martina.nord@ki.se](mailto:martina.nord@ki.se)**Address:**

Child and Adolescent Psychiatry Research Center  
Gävlegatan 22  
113 30 Stockholm  
Sweden

Phone: +46 08 514 522 15

**ABSTRACT**

**Objectives:** Social anxiety disorder (SAD) is one of the most common psychiatric disorders in youth, with a prevalence of about 3-4%, and increased risk of adverse long-term outcomes, such as depression. Cognitive behavioural therapy (CBT) is considered the first-line treatment for youth with SAD but many adolescents remain untreated due to limited accessibility to CBT. The aim of this study was to develop and evaluate the feasibility and preliminary efficacy of a therapist-guided Internet-delivered CBT treatment, supplemented with clinic-based group-exposure sessions (BIP SOFT).

**Design:** A proof-of-concept, open clinical trial with 6-month follow-up.

**Participants:** The trial was conducted at a child and adolescent psychiatric research clinic and participants ( $N = 30$ ) were 13-17 years old (83% girls) with a principal diagnosis of SAD.

**Intervention:** 12 weeks of intervention, consisting of nine remote therapist-guided Internet-delivered CBT sessions and three group-exposure sessions at the clinic for the adolescents and five internet-delivered sessions for the parents.

**Results:** Adolescents were generally satisfied with the treatment and the completion-rate of Internet-modules, as well as attendance at group-sessions, was high. Post-treatment assessment showed a significant decrease in clinician-, adolescent-, and parent-rated social anxiety ( $d = 1.17, 0.85, \text{ and } 0.79$ , respectively), as well as in general self- and parent-rated anxiety and depression ( $d = 0.76 \text{ and } 0.51$ ), compared with pre-treatment levels. Furthermore, 47% of participants no longer met DSM-5 criteria for SAD at post-treatment. At a 6-month follow-up, symptom reductions were maintained, or further improved, and 57% of participants no longer met criteria for SAD.

1  
2  
3 **Conclusion:** Therapist- and parent guided Internet-delivered CBT, supplemented  
4  
5 with a limited number of group-exposure sessions is a feasible and promising  
6  
7 intervention for adolescents with SAD.  
8

9  
10 **Trial registration number:** Clinicaltrials.gov registration ID NCT02576171  
11

#### 12 13 14 Strengths and limitations of this study

- 15     ▪ This is the first study to investigate the feasibility and efficacy of a
- 16         combined Internet-CBT and group-exposure treatment for youth with
- 17         social anxiety disorder.
- 18     ▪ Participants were followed up six months after the end of treatment.
- 19     ▪ The study was uncontrolled which limits any causal inference about
- 20         observed changes.
- 21
- 22
- 23
- 24
- 25
- 26
- 27
- 28
- 29
- 30
- 31

## 32 INTRODUCTION

33  
34 Social anxiety disorder (SAD) is characterized by an intense fear of being scrutinized and  
35 negatively evaluated in social or performance situations<sup>1</sup>. The socially anxious  
36 individual is typically afraid of making mistakes, being embarrassed in front of others  
37 and of showing signs of anxiety, such as blushing or trembling, and may therefore avoid  
38 social and performance situations or endure them under intense distress. The disorder  
39 has a median age of onset of 9.2 years <sup>2</sup> and is one of the most common mental disorders  
40 among adolescents. The 12-month prevalence is 3.4% <sup>3</sup> and 8.6% of the adolescent  
41 population fulfill diagnostic criteria at some point between the age of 13 and 18<sup>2</sup>. If the  
42 disorder is left untreated it tends to follow a chronic course<sup>2</sup> and can lead to severe  
43 secondary consequences such as depression<sup>4</sup> and suicidality<sup>5</sup>, substance and alcohol  
44 dependence<sup>6</sup>, academic underperformance and increased social isolation<sup>7</sup>.  
45  
46  
47  
48  
49  
50  
51  
52  
53  
54  
55  
56  
57  
58  
59  
60

1  
2  
3 Consequently, SAD causes substantial impairment as well as burden on patients' families  
4  
5 and long-term societal costs <sup>8 9</sup>.

7 Cognitive behavioural therapy (CBT) for SAD is effective for adults <sup>10</sup> as well as for  
8  
9 children and adolescents <sup>11 12</sup> and is the first-line treatment according to international  
10  
11 clinical guidelines (e.g., the National Institute for Health and Care Excellence; NICE) <sup>13</sup>.  
12  
13 For youth, particularly face-to-face group-CBT is effective for SAD <sup>14-19</sup>.

16 Despite the high level of impairment caused by the disorder, only a small proportion  
17  
18 of adolescents with social anxiety seek help for their problems <sup>20 21</sup> and even fewer  
19  
20 receive effective treatment <sup>22</sup>. Barriers to receiving evidence-based psychological  
21  
22 treatment include limited availability of trained therapists, and practical issues such as  
23  
24 long travel distances to clinics, and the requirement to take time off school or work to  
25  
26 visit a clinic.  
27  
28

30 Internet-delivered CBT (ICBT) has been suggested as a possible solution to some of  
31  
32 these barriers. It can provide the same treatment components as traditional CBT and  
33  
34 allow patients to work from home (or wherever suitable), guided by an online-therapist,  
35  
36 e.g. through e-mail or similar online communication. Treatment becomes more  
37  
38 accessible as the therapist and patient can communicate asynchronously and it may  
39  
40 increase treatment capacity, as therapist time per patient tends to be lower compared  
41  
42 with face-to-face CBT<sup>23-25</sup>. For adults with SAD, ICBT is an evidence-based treatment <sup>26</sup>  
43  
44 with at least one trial showing that ICBT is non-inferior to face-to-face CBT <sup>27</sup>. For youth,  
45  
46 ICBT is effective for mixed anxiety disorders when compared to a waitlist control <sup>28-31</sup>,  
47  
48 with similar effects as face-to-face CBT <sup>32</sup>, suggesting that ICBT could be a suitable  
49  
50 treatment for adolescents with SAD. However, a recent study showed that only 12.8%  
51  
52 and 14.6% (in the SAD specific and generic ICBT conditions, respectively) of participants  
53  
54  
55  
56  
57  
58  
59  
60

1  
2  
3 were free from their SAD diagnosis at post-treatment assessment, indicating that using  
4  
5 the Internet, as the only modality to deliver CBT might not be sufficient<sup>33</sup>.  
6

7  
8 The objective of the current trial is to evaluate the feasibility and efficacy of ICBT  
9  
10 supplemented with clinic-based group-exposure sessions, for adolescents with SAD, a  
11  
12 treatment that could potentially draw on advantages from both formats, where ICBT is a  
13  
14 cost-effective and accessible format and group-sessions may ensure that key treatment  
15  
16 components, such as exposure to social situations, are conveyed properly. Main research  
17  
18 questions are: Is the treatment (BIP SOFT) feasible and acceptable with regard to  
19  
20 adolescents' and parents' willingness to work with the Internet-modules, adolescents'  
21  
22 attendance rates at group sessions and treatment satisfaction? Does the treatment  
23  
24 reduce social anxiety symptoms and increase adolescents' level of functioning and  
25  
26 quality of life?  
27  
28  
29  
30  
31

## 32 **METHOD**

33  
34  
35 The study was conducted at a research unit within the Child and Adolescent Mental  
36  
37 Health Services in Stockholm, Sweden, and was approved by the Regional Ethical Review  
38  
39 Board in Stockholm, Sweden (2015/1383-31/2).  
40

### 41 **Participants**

42  
43 Participants were 30 adolescents, 13-17 years old, with a principal diagnosis of SAD, and  
44  
45 their parents. Table 1 gives detailed information on demographic and clinical  
46  
47 characteristics of the sample. Inclusion criteria were: a) age 13-17 years, b) principal  
48  
49 DSM-5 diagnosis of SAD, c) ability to read and write Swedish, d) access to a computer  
50  
51 with Internet access and e) at least one parent being able to participate in the treatment.  
52  
53 Exclusion criteria were: f) initiation or dose modification of psychotropic drug within  
54  
55 the past six weeks, g)  $\geq 5$  sessions of CBT (including exposure) within the last six  
56  
57  
58  
59  
60

1  
2  
3 months, h) any ongoing psychological treatment for SAD, i) diagnosed with an autism  
4  
5 spectrum disorder, current psychosis, eating disorder, severe depression, suicidal  
6  
7 behaviour or other current severe psychiatric condition j) current substance- or alcohol  
8  
9 abuse. Adolescents excluded due to other severe psychiatric conditions, such as severe  
10  
11 depression or suicidality, were referred to more suitable treatments.  
12  
13

14  
15 Participants were mainly recruited through advertisement in a local paper. The  
16  
17 advertisement included a website address ([www.bup.se/bip](http://www.bup.se/bip)) where interested families  
18  
19 could get study information and sign up. Clinicians working in the child- and adolescent  
20  
21 health services could also refer patients to the trial.  
22  
23

24  
25 To achieve sufficient power and to be able to detect a within-group effect size of  $d =$   
26  
27 0.60 from pre to post with a power of 0.85 and  $\alpha = 0.05$ , allowing for a 10% drop out, we  
28  
29 included 30 participants in the study.  
30  
31

32  
33 -----  
34  
35 Insert Table 1 here  
36  
37 -----

## 38 39 **Measures**

### 40 41 *Primary outcome measures*

42  
43 The Clinical Global Impression – Severity (CGI-S)<sup>34</sup> is a clinician rating of symptom  
44  
45 severity, ranging from 1 (“normal, not mentally ill”) to 7 (“extremely ill”). The CGI-S  
46  
47 was administered at baseline by the treating therapist. At post-treatment and the 6-  
48  
49 month follow-up, another clinician than the one being responsible for the treatment  
50  
51 administered the CGIS-S.  
52  
53

### 54 55 *Secondary outcome measures*

56  
57  
58  
59  
60



1  
2  
3 Mini International Neuropsychiatric Interview for Children and Adolescents (M.I.N.I.  
4 KID)<sup>35</sup>, was used to determine presence of SAD, as well as comorbid conditions. In  
5  
6  
7 addition, the SAD section of the Anxiety Disorders Interview Schedule for DSM-IV-Child  
8  
9  
10 Version (ADIS-C)<sup>36</sup> was used to further confirm SAD-diagnosis and to assess the  
11  
12 intensity of SAD symptoms. An independent rater (a clinical psychologist, not part of the  
13  
14 research group, blind to whether the adolescent had been included in the study or not)  
15  
16 watched recordings of the baseline interviews and reassessed 20% of them (both  
17  
18 included and excluded adolescents), generating an excellent inter-rater reliability at pre-  
19  
20 treatment for SAD-diagnosis ( $\kappa = 1.0$ ) and a fair inter-rater reliability for comorbidity ( $\kappa$   
21  
22 = 0.46,  $p < .05$ ).  
23  
24

25  
26 Clinical global impression – Improvement (CGI-I)<sup>34</sup> is a clinician rating of the  
27  
28 participant's change in symptom severity relative to baseline, ranging from 1 ("very  
29  
30 much improved") to 7 ("very much worse"). The Children's Global Assessment Scale  
31  
32 (CGAS)<sup>37</sup> is a clinician rating of global functioning (scale 0-100), with higher rating  
33  
34 indicating higher level of functioning. The M.I.N.I. KID and CGAS were administered at  
35  
36 baseline, post-treatment and at the 6-month follow-up, whereas the CGI-I was  
37  
38 administered post-treatment and at the 6-month follow-up.  
39  
40

41  
42 Social Phobia and Anxiety Inventory - Child and Parent Version (SPAI-C/P)<sup>38</sup> is a 26-  
43  
44 item self-report measure evaluating aspects of SAD on a 3-point scale, where a score of  
45  
46  $\geq 18$  is considered the clinical level of social anxiety. The Social Phobia Weekly Summary  
47  
48 Scale (SPWSS) is a five-item self-report scale<sup>39 40</sup> measuring dimensions of SAD (social  
49  
50 anxiety, avoidance, self-focused attention, anticipatory processing and post-event  
51  
52 processing). The SPAI-C/P and the SPWSS were administered at baseline, every third  
53  
54 week during treatment, post-treatment as well as at the 6-month follow-up.  
55  
56  
57  
58  
59  
60

1  
2  
3 The Revised Children Anxiety And Depression Scale – Child and Parent Version  
4  
5 (RCADS-C/P)<sup>41</sup> is a 47-item self-report measure evaluating anxiety disorders (including  
6  
7 one subscale for SAD) and depression on a 4-point scale, ranging from *never* to *always*.  
8  
9 In the current trial one item regarding suicidality, with three options (“I do not think  
10  
11 about killing myself”, “I think about killing myself, but would never do it” or “I want to  
12  
13 kill myself”), was added at the end of the RCADS-C/P. The Education, Work and Social  
14  
15 Adjustment Scale – Child and Parent Version (EWSAS-C/P)<sup>42 43</sup> is a 5-item self-report  
16  
17 scale measuring functional impairment on a 9-point scale (higher rating indicating more  
18  
19 impairment). The RCADS-C/P and the EWSAS-C/P were administered at baseline, after  
20  
21 six weeks of treatment, post-treatment as well as at the 6-month follow-up.  
22  
23  
24

25  
26 The Health related quality of life questionnaire for children, adolescents and their  
27  
28 parents (KIDSCREEN-10)<sup>44</sup> is a self-report measure assessing health related quality of  
29  
30 life. The parent-rated measure Trimbos/iMTA questionnaire for Costs associated with  
31  
32 Psychiatric Illness – Child version (TiC-P)<sup>45</sup> covers e.g. production loss among parents  
33  
34 due to health problems in the child. The KIDSCREEN-10 and the TiC-P were  
35  
36 administered at baseline, post-treatment and at the 6-month follow-up.  
37  
38  
39  
40

#### 41 *Feasibility measures, adverse events and therapist time*

42  
43 The Technology Acceptance Scale – child and parent version (TAS-C/P) is a self-report  
44  
45 measure adapted from Venkatesh et al.<sup>46</sup>, which measures the usefulness, acceptability  
46  
47 and satisfaction of the website through which the Internet-modules of the treatment  
48  
49 were delivered. The TAS-C/P was administered after three weeks of treatment and post-  
50  
51 treatment.  
52  
53  
54  
55  
56  
57  
58  
59  
60

1  
2  
3 At post-treatment, adolescents and parents were asked to report any negative  
4 experiences or adverse events over the course of treatment as well as to what extent the  
5 negative event had affected the adolescent's wellbeing.  
6  
7  
8

9  
10 Amount of therapist time per participant was logged automatically through the  
11 Internet-treatment platform.  
12  
13

## 14 15 16 **Procedure**

17  
18 Figure 1 gives an overview of inclusion procedures and assessment points. Families who  
19 applied to the study were contacted by telephone and a short screening interview was  
20 conducted. Eligible families were invited to diagnostic assessment at the clinic. After  
21 thorough information about the study, adolescents gave verbal assent to participate and  
22 written informed consent was obtained from parents. The screening interview M.I.N.I.  
23 KID (with the supplement of the SAD section of the ADIS-C) was then conducted. The  
24 therapist who conducted the baseline assessment was responsible for the treatment of  
25 the participant.  
26  
27  
28  
29  
30  
31  
32  
33  
34  
35

36  
37 Adolescents with a principal diagnosis of SAD were included and adolescents and  
38 parents completed baseline self-report measures online through the treatment platform.  
39 In each family, one of the parents was assigned the main responsibility to respond to the  
40 parent-report measures at each assessment point throughout the study. Adolescents and  
41 parents had separate user accounts and a two-factor authentication (an individual  
42 password and a single-use code sent to the user's cellular phone) gave access to the  
43 online platform.  
44  
45  
46  
47  
48  
49  
50  
51

52  
53 Self- and parent rated measures administered during the treatment (SPAI C/P,  
54 SPWSS, RCADS C/P and EWSAS C/P) were completed online.  
55  
56  
57  
58  
59  
60

1  
2  
3 At post-treatment and at the 6-month follow-up all participating adolescents and  
4  
5 parents were invited back to the clinic for a diagnostic assessment. To reduce the risk of  
6  
7 biased assessment, a clinician that had not been responsible for the participant's  
8  
9 treatment conducted the post-treatment and follow-up assessments. All self-assessment  
10  
11 scales were administered online post-treatment and at follow-up. Families who could  
12  
13 not come to the clinic for post-treatment assessment (n = 1) and 6-month follow-up (n =  
14  
15 3) were assessed over the telephone.  
16  
17  
18  
19 -----

20  
21 Insert Figure 1 here  
22  
23 -----  
24

## 25 **Intervention**

26  
27 The intervention was 12 weeks of ICBT supplemented with group-exposure, comprising  
28  
29 nine Internet-delivered modules completed individually from home, and three group-  
30  
31 exposure sessions at the clinic (Table 2). The online treatment platform used in this  
32  
33 study was developed for delivery of ICBT and has been tested in a number of previous  
34  
35 studies for different psychiatric disorders in youth<sup>25 31 47-49</sup>. The current treatment (BIP  
36  
37 SOFT) was based on the cognitive-behavioural model by Rapee and Heimberg<sup>50</sup> and to  
38  
39 some extent on the cognitive model by Clark and Wells<sup>51</sup>. The treatment manual was  
40  
41 developed by the authors and contains CBT components commonly used for SAD in  
42  
43 youth<sup>14 18 52</sup>, such as exposure, coping strategies and social skills training. The group  
44  
45 sessions were mostly based on the Albano and DiBartolo group-CBT manual for  
46  
47 adolescent SAD<sup>52</sup>. Therapists in the study were three clinical psychologists and two  
48  
49 master students at their final year of training in clinical psychology.  
50  
51  
52  
53

54  
55 The Internet-modules included educative texts, animations, audio clips and exercises.  
56  
57 The parental part of the intervention consisted of five Internet-modules with parent-  
58  
59  
60

1  
2  
3 specific topics such as “parental traps” (e.g., compensating for the adolescent in social  
4 situations by for instance speaking for him/her) and doing functional analyses of such  
5 parental accommodation (Table 2). Parents were encouraged to be actively involved in  
6 their adolescent’s treatment and discuss with the adolescent how they should support  
7 him or her throughout the treatment, e.g. during exposure exercises. Parents were also  
8 encouraged to bring up parent-specific topics with their therapist, for example how to  
9 support the adolescent before or during exposures. Parents could send messages to the  
10 therapist throughout the 12 weeks of treatment. Adolescents and parents were  
11 instructed to log in and complete one module each week. The therapists had  
12 asynchronous contact online with adolescents and parents every week, commenting on  
13 their progress on work sheets and through a built in message function. If necessary,  
14 therapists had telephone contact with families, e.g., if they hadn’t logged in during the  
15 last week or if mid-treatment self-reports exceeded a cut-off for depression (>11 on  
16 RCADS-C depression subscale) or suicidality.  
17  
18  
19  
20  
21  
22  
23  
24  
25  
26  
27  
28  
29  
30  
31  
32  
33

34 The group-exposure sessions (at week 4, 6 and 10) ensured that key components of  
35 the treatment were demonstrated in a correct way and that participants could practice  
36 e.g. exposure under observation of a therapist. To ensure large enough group sizes,  
37 cohorts of six participants started the treatment at the same time. The group sessions  
38 were two hours long and led by two of the clinical psychologists.  
39  
40  
41  
42  
43  
44  
45

46 -----  
47  
48 Insert Table 2 here  
49  
50 -----  
51

## 52 **Statistical analysis**

53 All analyses were conducted in SPSS Version 23.  
54  
55  
56  
57  
58  
59  
60

1  
2  
3 Cohen's kappa coefficient ( $\kappa$ )<sup>53</sup> was used to calculate inter-rater reliability for SAD-  
4  
5 diagnosis and comorbidity at pre-treatment assessment. The level of reliability is  
6  
7 interpreted as poor when  $\kappa < 0.40$ , fair when  $\kappa$  is 0.40-0.59, good when  $\kappa$  is 0.60-0.74 and  
8  
9 excellent when  $\kappa > 0.74$ <sup>54</sup>.

10  
11 Linear mixed models were used to analyse changes from pre- to post-treatment, and  
12  
13 from post-treatment to 6-month follow-up. Mixed model analyses use all available data  
14  
15 and account for correlations between measurements within the same subject<sup>55</sup>. Thus,  
16  
17 missing data is handled within the model. All mixed models in this study included a fixed  
18  
19 effect for time (pre, post and 6-month follow-up) and a random effect for individual  
20  
21 subjects. Potential missing bias was investigated using *t*-tests that compared the  
22  
23 baseline characteristics of those who had complete data at post-treatment with those  
24  
25 who had missing data. For SPAI C/P and SPWSS three mid-treatment (week 3, 6 and 9)  
26  
27 time points were included in the analyses, and for RCADS C/P and EWSAS C/P one mid-  
28  
29 treatment (week 6) time point was included in the analyses.  
30  
31  
32  
33

34  
35 Effect sizes are reported as Cohen's  $d = (M_1 - M_2 / SD_{\text{pooled}})$ . Effect sizes are defined  
36  
37 according to Cohen's suggested levels, small ( $d \geq 0.20$ ), moderate ( $d \geq 0.50$ ) and large ( $d$   
38  
39  $\geq 0.80$ )<sup>56</sup>.

## 40 41 **RESULTS**

### 42 43 **Response rate and feasibility**

44  
45 Mid-treatment measures were completed by 97% of the participating families at week  
46  
47 three, 83% at week six and 70% at week nine. Post-treatment and 6-month follow-up  
48  
49 measures were completed by 90% and 83% of the participating families, respectively. T-  
50  
51 tests comparing participants with missing versus complete data points on baseline  
52  
53 characteristics revealed no statistically significant differences.  
54  
55  
56  
57  
58  
59  
60

1  
2  
3 Adolescents completed on average 5.7 ( $sd = 2.1$ ) of the nine Internet-modules and  
4  
5 parents completed on average 4.4 ( $sd = 1.0$ ) of their five modules. Attendance at the  
6  
7 group-sessions were 70% (session 1), 77% (session 2) and 63% (session 3)  
8  
9 respectively. Two thirds of the participants attended two or more group sessions and  
10  
11 only 10% attended none.

12  
13  
14 None of the adolescents meeting inclusion criteria at baseline assessment declined  
15  
16 participation, which indicates good acceptability of the offered treatment.

17  
18  
19 Figure 2 illustrates that a majority of the adolescents were satisfied with the  
20  
21 treatment, would recommend the treatment to a friend and found the program easy to  
22  
23 understand.

24  
25  
26 -----  
27  
28 Insert Figure 2 here  
29  
30 -----  
31

### 32 **Clinician support**

33  
34 The average time a clinician spent giving feedback and guidance to participants  
35  
36 (including time spent on the adolescent *and* parent) was 19.5 minutes per week for the  
37  
38 Internet-modules. Group sessions required two hours of therapist time per participant  
39  
40 in total during the 12 weeks, which corresponds to 10 minutes per week and  
41  
42 participant. In total thus, each family got 29.5 minutes of therapist time, per week.  
43  
44  
45  
46  
47

### 48 **Changes in clinical outcomes from pre- to post-treatment**

49  
50 Means, standard deviations and effect sizes for pre to post changes, are presented in  
51  
52 Table 3. Intention-to-treat analyses of the primary outcome measure (CGI-S) showed a  
53  
54 significant decrease of SAD severity from pre- to post-treatment,  $t(26.05) = 5.62, p < .001$ ,  
55  
56 with a large effect size,  $d = 1.17$  (95%CI 0.61,1.72). For all secondary outcome measures,  
57  
58  
59  
60

1  
2  
3 analyses revealed significant improvements with moderate to large effect sizes, with the  
4  
5 exception of quality of life (KIDSCREEN-C/P) where a small effect was observed. At post-  
6  
7 treatment, 47% of the participants ( $n = 14$ ) no longer met diagnostic criteria for SAD,  
8  
9 according to DSM-5 criteria and a CGI-rating  $<4$  (level of severity and functional  
10  
11 impairment below diagnostic threshold) and 30% ( $n = 9$ ) scored  $\leq 18$  on SPAI-C (cut-off  
12  
13 for clinical level of social anxiety). On the clinician rated CGI-I 8% ( $n=2$ ) were “very  
14  
15 much improved”, 23% ( $n = 6$ ) “much improved”, 42% ( $n = 11$ ) “minimally improved”,  
16  
17 23% ( $n = 6$ ) “not changed” and 4% ( $n = 1$ ) “minimally worse”.  
18  
19  
20  
21  
22

### 23 **Changes in clinical outcomes from post-treatment to 6-month follow-up**

24  
25 Table 3 gives an overview of means, standard deviations and effect sizes from post-  
26  
27 treatment to the 6-month follow-up. The improvements seen at post-treatment were  
28  
29 generally maintained and further augmented at the 6-month follow-up with small effect  
30  
31 sizes, except for self-focus (SPWSS) that deteriorated slightly. The primary outcome  
32  
33 measure (CGI-S) showed a significant decrease of SAD severity from post-treatment to  
34  
35 6-month follow up,  $t(25.45) = 2.60, p < .05$ , with a small effect size,  $d = 0.22$  (95%CI -0.01,  
36  
37 0.45). At follow-up, 57% ( $n = 17$ ) no longer met diagnostic criteria for SAD and 37% ( $n =$   
38  
39 11) scored  $\leq 18$  on SPAI-C.  
40  
41  
42

43  
44 Comparison of pre-treatment and 6-month follow-up levels of social anxiety showed  
45  
46 overall improvements with large effect-sizes, CGI-S:  $t(27.23) = 6.24, p < .001, d = 1.36$   
47  
48 (95%CI 0.71, 2.01), SPAI-C:  $t(27.63) = 5.50, p < .001, d = 0.95$  (95%CI 0.51, 1.39) and  
49  
50 SPAI-P:  $t(26.08) = 5.57, p < .001, d = 1.14$  (95%CI 0.57, 1.72). Clinician-rated CGI-I  
51  
52 indicated that, of those who participated in the 6-month follow-up assessment, 19% ( $n =$   
53  
54 5) were “very much improved”, 31% ( $n = 8$ ) “much improved”, 38% ( $n = 10$ ) “minimally  
55  
56  
57  
58  
59  
60



1  
2  
3 improved", 4% ( $n = 1$ ) "not changed" and 8% ( $n = 2$ ) "minimally worse", compared to  
4  
5 baseline.

### 6 7 **Post-hoc analyses**

8  
9  
10 The proportion of parents reporting that they had stayed home from work during the  
11  
12 last month due to their adolescent's health problems was 27% before treatment and  
13  
14 13% at 6-month follow-up. Of the adolescents, 50% had stayed home from school during  
15  
16 the last month due to health problems before treatment and 33% at 6-month follow-up.

17  
18  
19 At 6-month follow-up, six participants reported that they had received additional  
20  
21 treatment for social anxiety; two participants (7%) got CBT and four participants (13%)  
22  
23 had initiated or increased SSRI medication. Half of all participants ( $n=15$ ) reported that  
24  
25 they had used strategies from the treatment since post-treatment assessment, referring  
26  
27 to exposure, coping strategies (such as breathing exercises and focus shift) and cognitive  
28  
29 techniques as the most common ones.  
30  
31

### 32 33 **Adverse events**

34  
35 Seven adolescents (23%) reported having experienced some negative event during the  
36  
37 course of treatment. These events included increased stress due to the limited time to  
38  
39 work with treatment modules ( $n = 4$ ; 13%), increased social anxiety ( $n=1$ ; 3%),  
40  
41 increased panic anxiety ( $n=1$ ; 3%) and increased depression and negative thoughts  
42  
43 ( $n=1$ ; 3%). Those who reported increased stress and anxiety associated these symptoms  
44  
45 with the first weeks of treatment and typically described a decrease as treatment  
46  
47 continued. Two adolescents reported that the negative event (increased negative  
48  
49 thoughts in one case and increased panic anxiety in the other case) still had some impact  
50  
51 on their wellbeing at the end of treatment.  
52  
53  
54  
55  
56  
57  
58  
59  
60

## DISCUSSION

To our knowledge this is the first study evaluating the feasibility and efficacy of therapist- and parent-guided, Internet-delivered cognitive behavioural therapy (ICBT), supplemented with group-exposure sessions, for adolescents with SAD. The results show that such a combined treatment format is both feasible and potentially efficacious and that the improvements are maintained at least 6 months beyond treatment termination. Feasibility was indicated by the high proportion of participants who reported satisfaction with the program, and who would recommend it to a peer, as well as by the high attendance rate at group-sessions and good completion of online-sessions. The results showed substantial reductions of social anxiety symptoms on all clinician-, adolescent- and parent-rated measures at post treatment, as well as improvements in secondary outcomes such as overall anxiety and level of functioning. These symptom reductions were maintained or further improved at the 6-month follow-up.

The adolescents completed on average nearly two thirds of the 9 online-modules which is more than in previous studies on ICBT for youth with SAD where participants have completed less than half of the modules on average<sup>29 33</sup>. It is possible that the face-to-face component (group-exposure sessions) in the present study influenced the working pace with the Internet-modules as participants were recommended to complete the preceding modules before attending group-exposure sessions. Even if completion of previous modules was not a prerequisite for attendance at group sessions, participants tended to complete them before attending the sessions. Participants also had peer and therapist support in the group on aspects of the Internet-delivered modules that they found difficult (e.g., designing an idiosyncratic exposure hierarchy), which might have led to more motivation to work with modules *after* group sessions. It

1  
2  
3 has been proposed that socially anxious children and adolescents have a tendency to  
4  
5 avoid practicing skills on their own that they have learned online, such as conducting in-  
6  
7 vivo exposure<sup>33</sup>. It could therefore be hypothesized that the group-sessions in this study  
8  
9 enhanced the participants' inclination to practice skills at home as a consequence of  
10  
11 being offered intensive therapist guidance and direct feedback during group-exposure.  
12  
13

14 Forty seven per cent of participants no longer met diagnostic criteria for SAD after  
15  
16 treatment, a proportion that further increased to 57% at 6-month follow-up. This is in  
17  
18 line with levels reported in studies evaluating face-to-face CBT for youth with SAD<sup>14-16 18</sup>  
19  
20 <sup>57</sup> and higher than strictly Internet-delivered CBT for youth with SAD<sup>33</sup>. A recent trial of  
21  
22 ICBT for youth with SAD reported a relatively limited impact on the clinical diagnosis of  
23  
24 SAD (in the two active treatment conditions 12.8 and 14.6% at post-treatment and  
25  
26 29.8% and 35.4 % at 6-month follow-up, no longer met diagnostic criteria for SAD)<sup>33</sup>  
27  
28 and the authors suggest that stand-alone ICBT might not be enough for youth with  
29  
30 SAD<sup>33</sup>. It is tempting to attribute the better outcomes in our trial to the addition of  
31  
32 group-exposure sessions to the ICBT protocol, though this hypothesis remains to be  
33  
34 formally evaluated. Discrepancies between our and previous results may also be  
35  
36 attributable to differences in study samples, study design or other methodological  
37  
38 aspects.  
39  
40  
41  
42

43  
44 Therapists in this study spent less than 20 minutes per family and week, on the  
45  
46 Internet-delivered treatment, which is comparable to previous ICBT trials for youth<sup>24 25</sup>.  
47  
48 Although the group sessions added another 10 minutes per family and week in the  
49  
50 present trial, group-exposure supplemented ICBT should still be considered a time-  
51  
52 efficient intervention compared with face-to-face CBT where the therapist time per  
53  
54 family and week usually ranges from 45-60 minutes.  
55  
56  
57  
58  
59  
60

1  
2  
3       Around a fifth of the participants reported a negative event during the course of the  
4  
5 treatment. Some of the events were expected, such as increased social anxiety when  
6  
7 exposure is initiated. Reports of increased stress were also associated with the first  
8  
9 weeks of the treatment and can be interpreted as an initial difficulty combining  
10  
11 treatment with other demands such as schoolwork. Two participants reported having  
12  
13 experienced some negative events that affected their wellbeing beyond the treatment  
14  
15 termination but these participants still benefited from treatment.  
16  
17

18  
19       Overall, the treatment seems feasible and possibly efficacious for adolescents with  
20  
21 SAD and their parents, but to be considered for implementation in regular care, an  
22  
23 intervention must also be feasible from an organizational point of view. A possible  
24  
25 drawback with the addition of group-exposure to ICBT is that it limits the flexibility of  
26  
27 the intervention. For instance, several patients must be recruited and able to commence  
28  
29 treatment at the same time. A possible alternative to group-exposure sessions is to add  
30  
31 other forms of direct communication between patients and ICBT-therapists, e.g. video  
32  
33 conferencing or equivalent, something that future studies should investigate further.  
34  
35  
36  
37  
38

### 39       **Limitations**

40  
41       Although this feasibility trial has several strengths, some important limitations need to  
42  
43 be considered when interpreting the results. Causal inferences of observed changes are  
44  
45 not possible due to lack of a control condition. Thus, improvement could be an effect of  
46  
47 non-specific factors such as the therapist attention or of the passage of time. However,  
48  
49 SAD has been shown to commonly follow a chronic course when left untreated<sup>2</sup> and it is  
50  
51 not likely that spontaneous remission would explain a significant part of the  
52  
53 improvements in the study. Additionally, results were maintained and slightly improved  
54  
55 at follow-up, indicating that treatment gains were stable over time, even after the  
56  
57  
58  
59  
60

1  
2  
3 attention from a therapist had ceased. A small proportion of the participants did seek  
4  
5 additional care between post-treatment and 6-month follow-up, which could have  
6  
7 affected the results. However, these participants all continued to report high levels of  
8  
9 social anxiety at follow-up, implying that additional care had limited impact on the long-  
10  
11 term outcome. Another limitation concerns assessment at post-treatment and follow-up.  
12  
13 Although attempts to reduce bias were made by having these assessments conducted by  
14  
15 clinicians not involved in the treatment, assessors were not blind to the fact that the  
16  
17 participant had received treatment.  
18  
19

## 20 21 22 23 **Conclusions**

24  
25 This is the first study of therapist- and parent-guided ICBT supplemented with group-  
26  
27 exposure for adolescents with SAD. The intervention was highly acceptable to the  
28  
29 families and significantly reduced social anxiety symptoms up to 6-month follow-up.  
30  
31 Participants were generally satisfied with the treatment and the completion-rate of  
32  
33 Internet-modules and attendance at group sessions were high, indicating that the  
34  
35 treatment is feasible and acceptable to the SAD youth population. Furthermore, per-  
36  
37 patient therapist time was limited, even considering the time spent on group-sessions;  
38  
39 thus, ICBT supplemented with group-exposure might be cost-effective when compared  
40  
41 to traditional face-to-face CBT. Further controlled trials are needed.  
42  
43  
44  
45  
46  
47

48 **Acknowledgements** The authors would like to thank Ulrika Thulin for invaluable help with writing the  
49  
50 treatment modules, and Cornelia Hanqvist and Jon Juselius for assisting with providing the treatment.  
51

52 **Contributors** The study was designed by MN, SV, DMC, ES and JH. MN was the project manager in  
53  
54 collaboration with JH. MN wrote the treatment modules and provided the treatment in collaboration  
55  
56 with JH and SV. All statistical analyses were conducted by JH and MN. MN drafted the manuscript in  
57  
58  
59  
60

1  
2  
3 collaboration with JH. The manuscript was reviewed and revised by SV, ES, DMC, BL and LGÖ. All  
4  
5 authors have read and approved the final manuscript.

6  
7 **Funding** This work was supported by the Stockholm County Council (PPG project 20150032; HSNV  
8  
9 140 99; HSN 1011-1176) and the Swedish Research Council and Swedish Research Council for  
10  
11 Health, Working Life and Welfare (Forte 2014-4052)

12 **Competing interests** None.

13  
14 **Data sharing statement** No additional data are available.

15  
16 **Open Access** This is an Open Access article distributed in accordance with the Creative Commons  
17  
18 Attribution Non Commercial (CC BY-NC 4.0) license, which permits others to distribute, remix, adapt,  
19  
20 build upon this work non-commercially, and license their derivative works on different terms, provided  
21  
22 the original work is properly cited and the use is non-commercial. See:

23  
24 <http://creativecommons.org/licenses/by-nc/4.0/>  
25  
26  
27  
28  
29  
30  
31  
32  
33  
34  
35  
36  
37  
38  
39  
40  
41  
42  
43  
44  
45  
46  
47  
48  
49  
50  
51  
52  
53  
54  
55  
56  
57  
58  
59  
60

## References

1. Association AP. Diagnostic and statistical manual of mental disorders (DSM-5®): American Psychiatric Pub 2013.
2. Burstein M, He JP, Kattan G, et al. Social phobia and subtypes in the national comorbidity survey-adolescent supplement: prevalence, correlates, and comorbidity. *J Am Acad Child Adolesc Psychiatry* 2011;50(9):870-80. doi: 10.1016/j.jaac.2011.06.005 [published Online First: 2011/08/30]
3. Lawrence D, Johnson S, Hafekost J, et al. The Mental Health of Children and Adolescents: Report on the Second Australian Child and Adolescent Survey of Mental Health and Wellbeing. 2015
4. Beesdo K, Bittner A, Pine DS, et al. Incidence of social anxiety disorder and the consistent risk for secondary depression in the first three decades of life. *Arch Gen Psychiatry* 2007;64(8):903-12.
5. Katzelnick DJ, Kobak KA, DeLeire T, et al. Impact of generalized social anxiety disorder in managed care. *Am J Psychiatry* 2001;158(12):1999-2007.
6. Buckner JD, Schmidt NB, Lang AR, et al. Specificity of social anxiety disorder as a risk factor for alcohol and cannabis dependence. *J Psychiatr Res* 2008;42(3):230-39.
7. Beidel DC, Turner SM, Morris TL. Psychopathology of childhood social phobia. *J Am Acad Child Adolesc Psychiatry* 1999;38(6):643-50. doi: 10.1097/00004583-199906000-00010 [published Online First: 1999/06/11]
8. Acarturk C, Smit F, De Graaf R, et al. Economic costs of social phobia: a population-based study. *J Affect Disord* 2009;115(3):421-29.
9. Patel A, Knapp M, Henderson J, et al. The economic consequences of social phobia. *J Affect Disord* 2002;68(2):221-33.
10. Hofmann SG, Smits JA. Cognitive-behavioral therapy for adult anxiety disorders: a meta-analysis of randomized placebo-controlled trials. *J Clin Psychiatry* 2008;69(4):621.
11. Scaini S, Belotti R, Ogliari A, et al. A comprehensive meta-analysis of cognitive-behavioral interventions for social anxiety disorder in children and adolescents. *J Anxiety Disord* 2016;42:105-12. doi: 10.1016/j.janxdis.2016.05.008
12. Segool NK, Carlson JS. Efficacy of cognitive - behavioral and pharmacological treatments for children with social anxiety. *Depress Anxiety* 2008;25(7):620-31.
13. Pilling S, Mayo-Wilson E, Mavranouzouli I, et al. Recognition, assessment and treatment of social anxiety disorder: summary of NICE guidance. *BMJ* 2013;346:f2541.
14. Albano AM, Marten PA, Holt CS, et al. Cognitive-Behavioral Group Treatment for Social Phobia in Adolescents A Preliminary Study. *J Nerv Ment Dis* 1995;183(10):649-56.
15. Hayward C, Varady S, Albano AM, et al. Cognitive-behavioral group therapy for social phobia in female adolescents: results of a pilot study. *J Am Acad Child Adolesc Psychiatry* 2000;39(6):721-26.
16. Spence SH, Donovan C, Brechman - Toussaint M. The treatment of childhood social phobia: The effectiveness of a social skills training - based, cognitive - behavioural intervention, with and without parental involvement. *J Child Psychol Psychiatry* 2000;41(6):713-26.
17. Olivares J, García-López L-J, Beidel DC, et al. Results at long-term among three psychological treatments for adolescents with generalized social phobia (I): Statistical significance. *Psicología Conductual* 2002;10(1):147-66.

18. Beidel DC, Turner SM, Morris TL. Behavioral treatment of childhood social phobia. *J Consult Clin Psychol* 2000;68(6):1072-80. [published Online First: 2001/01/06]
19. Herbert JD, Gaudiano BA, Rheingold AA, et al. Cognitive behavior therapy for generalized social anxiety disorder in adolescents: A randomized controlled trial. *J Anxiety Disord* 2009;23(2):167-77.
20. Essau CA, Conradt J, Petermann F. Frequency and comorbidity of social phobia and social fears in adolescents. *Behav Res Ther* 1999;37(9):831-43. [published Online First: 1999/08/24]
21. Wittchen HU, Stein MB, Kessler RC. Social fears and social phobia in a community sample of adolescents and young adults: prevalence, risk factors and comorbidity. *Psychol Med* 1999;29(2):309-23. doi: 10.1017/s0033291798008174
22. Merikangas KR, He J-p, Burstein M, et al. Service utilization for lifetime mental disorders in US adolescents: Results of the National Comorbidity Survey-Adolescent Supplement (NCS-A). *J Am Acad Child Adolesc Psychiatry* 2011;50(1):32-45.
23. Hedman E, Andersson E, Ljotsson B, et al. Cost-effectiveness of Internet-based cognitive behavior therapy vs. cognitive behavioral group therapy for social anxiety disorder: results from a randomized controlled trial. *Behav Res Ther* 2011;49(11):729-36. doi: 10.1016/j.brat.2011.07.009 [published Online First: 2011/08/20]
24. Lenhard F, Andersson E, Mataix-Cols D, et al. Therapist-Guided, Internet-Delivered Cognitive-Behavioral Therapy for Adolescents With Obsessive-Compulsive Disorder: A Randomized Controlled Trial. *J Am Acad Child Adolesc Psychiatry* 2017;56(1):10-19.e2. doi: 10.1016/j.jaac.2016.09.515 [published Online First: 2016/12/21]
25. Lenhard F, Vigerland S, Andersson E, et al. Internet-delivered cognitive behavior therapy for adolescents with obsessive-compulsive disorder: an open trial. *PLoS One* 2014;9(6):e100773. doi: 10.1371/journal.pone.0100773 [published Online First: 2014/06/21]
26. Hedman E, Ljótsson B, Lindefors N. Cognitive behavior therapy via the Internet: a systematic review of applications, clinical efficacy and cost-effectiveness. *Expert Rev Pharmacoecon Outcomes Res* 2012;12(6):745-64.
27. Hedman E, Andersson G, Ljotsson B, et al. Internet-based cognitive behavior therapy vs. cognitive behavioral group therapy for social anxiety disorder: a randomized controlled non-inferiority trial. *PLoS One* 2011;6(3):e18001. doi: 10.1371/journal.pone.0018001 [published Online First: 2011/04/13]
28. March S, Spence SH, Donovan CL. The efficacy of an internet-based cognitive-behavioral therapy intervention for child anxiety disorders. *J Pediatr Psychol* 2009;34(5):474-87.
29. Tillfors M, Andersson G, Ekselius L, et al. A randomized trial of Internet-delivered treatment for social anxiety disorder in high school students. *Cogn Behav Ther* 2011;40(2):147-57. doi: 10.1080/16506073.2011.555486 [published Online First: 2011/01/01]
30. Donovan CL, March S. Online CBT for preschool anxiety disorders: a randomised control trial. *Behav Res Ther* 2014;58:24-35.
31. Vigerland S, Ljótsson B, Thulin U, et al. Internet-delivered cognitive behavioural therapy for children with anxiety disorders: A randomised controlled trial. *Behav Res Ther* 2016;76:47-56.



- 1
- 2
- 3 32. Spence SH, Donovan CL, March S, et al. A randomized controlled trial of online versus
- 4 clinic-based CBT for adolescent anxiety. *J Consult Clin Psychol* 2011;79(5):629-42.
- 5 doi: 10.1037/a0024512 [published Online First: 2011/07/13]
- 6
- 7 33. Spence SH, Donovan CL, March S, et al. Generic versus disorder specific cognitive
- 8 behavior therapy for social anxiety disorder in youth: A randomized controlled
- 9 trial using internet delivery. *Behav Res Ther* 2016;90:41-57. doi:
- 10 10.1016/j.brat.2016.12.003 [published Online First: 2016/12/19]
- 11
- 12 34. Guy W. Clinical global impression scale. *The ECDEU Assessment Manual for*
- 13 *Psychopharmacology-Revised Volume DHEW Publ No ADM 1976;76(338):218-22.*
- 14 35. Sheehan DV, Lecrubier Y, Sheehan KH, et al. The Mini-International Neuropsychiatric
- 15 Interview (M.I.N.I.): the development and validation of a structured diagnostic
- 16 psychiatric interview for DSM-IV and ICD-10. *J Clin Psychiatry* 1998;59 Suppl
- 17 20:22-33;quiz 34-57. [published Online First: 1999/01/09]
- 18
- 19 36. Albano A, Silverman W. The Anxiety Disorders Interview Schedule for Children for
- 20 DSM-IV: clinician manual (child and parent versions). *San Antonio, TX:*
- 21 *Psychological Corporation* 1996
- 22 37. Shaffer D, Gould MS, Brasic J, et al. A children's global assessment scale (CGAS). *Arch*
- 23 *Gen Psychiatry* 1983;40(11):1228-31. [published Online First: 1983/11/01]
- 24 38. Beidel DC, Turner SM, Morris TL. A new inventory to assess childhood social anxiety
- 25 and phobia - the social phobia and anxiety inventory for children *Psychol Assess*
- 26 1995;7(1):73-79. doi: 10.1037/1040-3590.7.1.73
- 27 39. Clark DM, Ehlers A, McManus F, et al. Cognitive therapy versus fluoxetine in
- 28 generalized social phobia: a randomized placebo-controlled trial. *J Consult Clin*
- 29 *Psychol* 2003;71(6):1058.
- 30 40. Hedman E, Mörtberg E, Hesser H, et al. Mediators in psychological treatment of social
- 31 anxiety disorder: Individual cognitive therapy compared to cognitive behavioral
- 32 group therapy. *Behav Res Ther* 2013;51(10):696-705.
- 33 41. Chorpita BF, Yim L, Moffitt C, et al. Assessment of symptoms of DSM-IV anxiety and
- 34 depression in children: a revised child anxiety and depression scale. *Behav Res*
- 35 *Ther* 2000;38(8):835-55. [published Online First: 2000/08/11]
- 36 42. Mundt JC, Marks IM, Shear MK, et al. The Work and Social Adjustment Scale: a simple
- 37 measure of impairment in functioning. *Br J Psychiatry* 2002;180:461-4.
- 38 [published Online First: 2002/05/02]
- 39 43. Mataix-Cols D, Cowley AJ, Hankins M, et al. Reliability and validity of the Work and
- 40 Social Adjustment Scale in phobic disorders. *Compr Psychiatry* 2005;46(3):223-
- 41 28.
- 42 44. Ravens-Sieberer U, Gosch A, Rajmil L, et al. KIDSCREEN-52 quality-of-life measure
- 43 for children and adolescents. *Expert Rev Pharmacoecon Outcomes Res*
- 44 2005;5(3):353-64.
- 45 45. Bouwmans C, De Jong K, Timman R, et al. Feasibility, reliability and validity of a
- 46 questionnaire on healthcare consumption and productivity loss in patients with a
- 47 psychiatric disorder (TiC-P). *BMC Health Serv Res* 2013;13(1):1.
- 48 46. Venkatesh V, Morris MG, Davis GB, et al. User acceptance of information technology:
- 49 Toward a unified view. *MIS quarterly* 2003:425-78.
- 50 47. Bonnert M, Olen O, Lalouni M, et al. Internet-Delivered Cognitive Behavior Therapy
- 51 for Adolescents With Irritable Bowel Syndrome: A Randomized Controlled Trial.
- 52 *Am J Gastroenterol* 2016 doi: 10.1038/ajg.2016.503 [published Online First:
- 53 2016/11/16]
- 54
- 55
- 56
- 57
- 58
- 59
- 60

- 1  
2  
3 48. Lenhard F, Vigerland S, Andersson E, et al. Internet-delivered cognitive behavior  
4 therapy for adolescents with obsessive-compulsive disorder: an open trial. *PLoS*  
5 *One* 2014;9(6):e100773.  
6  
7 49. Vigerland S, Thulin U, Ljotsson B, et al. Internet-delivered CBT for children with  
8 specific phobia: a pilot study. *Cogn Behav Ther* 2013;42(4):303-14. doi:  
9 10.1080/16506073.2013.844201 [published Online First: 2013/11/20]  
10 50. Rapee RM, Heimberg RG. A cognitive-behavioral model of anxiety in social phobia.  
11 *Behav Res Ther* 1997;35(8):741-56. [published Online First: 1997/08/01]  
12 51. Clark DM, Wells A. A cognitive model of social phobia. *Social phobia: Diagnosis,*  
13 *assessment, and treatment* 1995;41(68):00022-3.  
14 52. Albano AM, DiBartolo PM. Cognitive-Behavioral Therapy for Social Phobia in  
15 Adolescents: Stand Up, Speak Out Therapist Guide: Oxford University Press 2007.  
16 53. Cohen J. A coefficient of agreement for nominal scales. *Educational and Psychosocial*  
17 *Measurement*, 20, 37-46, 1960.  
18 54. Mannuzza S, Fyer AJ, Martin LY, et al. Reliability of anxiety assessment. I. Diagnostic  
19 agreement. *Arch Gen Psychiatry* 1989;46(12):1093-101. [published Online First:  
20 1989/12/01]  
21 55. Gueorguieva R, Krystal JH. Move over ANOVA: progress in analyzing repeated-  
22 measures data and its reflection in papers published in the Archives of General  
23 Psychiatry. *Arch Gen Psychiatry* 2004;61(3):310-7. doi:  
24 10.1001/archpsyc.61.3.310 [published Online First: 2004/03/03]  
25 56. Cohen J. A power primer. *Psychol Bull* 1992;112(1):155.  
26 57. Öst L-G, Cederlund R, Reuterskiöld L. Behavioral treatment of social phobia in youth:  
27 Does parent education training improve the outcome? *Behav Res Ther*  
28 2015;67:19-29.  
29  
30  
31  
32  
33  
34  
35  
36  
37  
38  
39  
40  
41  
42  
43  
44  
45  
46  
47  
48  
49  
50  
51  
52  
53  
54  
55  
56  
57  
58  
59  
60

Table 1. Demographic and clinical features of study participants (N = 30)

| Variables                                                                                                                        |                                           | N          | %    |
|----------------------------------------------------------------------------------------------------------------------------------|-------------------------------------------|------------|------|
| Age (years)                                                                                                                      | M (SD)                                    | 15 (1.22)  |      |
|                                                                                                                                  | min-max                                   | 13-17      |      |
| Gender                                                                                                                           | Girls                                     | 25         | 83   |
|                                                                                                                                  | Boys                                      | 5          | 17   |
| Country of birth, adolescent                                                                                                     | Sweden                                    | 29         | 97   |
|                                                                                                                                  | Other                                     | 1          | 3    |
| Country of birth, parents                                                                                                        | Both in Sweden                            | 20         | 67   |
|                                                                                                                                  | One in Sweden                             | 7          | 23   |
|                                                                                                                                  | None in Sweden                            | 3          | 10   |
| Education, responding parent                                                                                                     | Primary                                   | 14         | 47   |
|                                                                                                                                  | Higher                                    | 16         | 53   |
| Employment, responding parent                                                                                                    | Working                                   | 25         | 83   |
|                                                                                                                                  | Unemployed                                | 4          | 13   |
|                                                                                                                                  | Retired                                   | 1          | 3    |
| Psychotropic medication pre-treatment                                                                                            | None                                      | 27         | 90   |
|                                                                                                                                  | SSRI                                      | 3          | 10   |
| Prior psychological treatment                                                                                                    | None                                      | 11         | 37   |
|                                                                                                                                  | Primary care, counseling or equivalent    | 4          | 13   |
|                                                                                                                                  | Psychiatric specialist care or equivalent | 14         | 47   |
| Referred from child health services                                                                                              |                                           | 6          | 20   |
| Comorbid diagnoses                                                                                                               | Specific Phobia                           | 8          | 26.7 |
|                                                                                                                                  | GAD                                       | 5          | 16.7 |
|                                                                                                                                  | ADD                                       | 3          | 10   |
|                                                                                                                                  | Depression                                | 2          | 6.7  |
|                                                                                                                                  | OCD                                       | 2          | 6.7  |
|                                                                                                                                  | Panic disorder                            | 1          | 3.3  |
|                                                                                                                                  | Tics/Tourette                             | 1          | 3.3  |
|                                                                                                                                  | Separation anxiety                        | 1          | 3.3  |
|                                                                                                                                  | Trichotillomania                          | 1          | 3.3  |
| Frequency of comorbid diagnoses                                                                                                  | None                                      | 13         | 43.3 |
|                                                                                                                                  | One                                       | 11         | 36.7 |
|                                                                                                                                  | Two                                       | 3          | 10   |
|                                                                                                                                  | Three or more                             | 3          | 10   |
| Onset (age in years)                                                                                                             | M (SD)                                    | 8.9 (4.29) |      |
| Duration of SAD (years)                                                                                                          | M (SD)                                    | 6.2 (4.05) |      |
| <b>Note: Primary education ≤12. Higher education &gt;12 years.</b>                                                               |                                           |            |      |
| <b>Abbreviations: GAD = generalized anxiety disorder; ADD = attention deficit disorder; OCD = obsessive compulsive disorder.</b> |                                           |            |      |

**Table 2. An overview of the content of the ICBT protocol and group-exposure sessions**

| Chapter | Adolescent                                                                                                                         | Parent                                                                                                                                             | Group-exposure sessions                                                                                                                                                                  |
|---------|------------------------------------------------------------------------------------------------------------------------------------|----------------------------------------------------------------------------------------------------------------------------------------------------|------------------------------------------------------------------------------------------------------------------------------------------------------------------------------------------|
| 1       | Introduction to ICBT, Learn about emotions, fear and social anxiety. How to do functional analyses of my own behavior              | Introduction to ICBT. Learn about emotions, fear and social anxiety. How to do functional analyses of my teenager's behavior and my own reactions. |                                                                                                                                                                                          |
| 2       | More about social anxiety disorder. Learn to reduce self-focus and safety behaviors. Improve coping strategies.                    | Suggest treatment goals. Plan the treatment. Learn about exposure and how to be a co-therapist during exposure.                                    |                                                                                                                                                                                          |
| 3       | Map the social anxiety. Learn about exposure to social situations. Set treatment goals and build an individual exposure hierarchy. | Learn about common parental challenges. How to reward my adolescent. Problem solving.                                                              |                                                                                                                                                                                          |
| 4       |                                                                                                                                    | How to handle negative thoughts. Learn about social skills.                                                                                        | Modelling and practice of social skills. Modelling and mapping of safety behaviors and how to reduce them. Set an individual exposure hierarchy. Exposure in vivo. Summary with parents. |
| 5       | Exposure follow-up. Learn about negative thoughts and how to handle them.                                                          | Prepare relapse prevention. Evaluation of parent modules and treatment.                                                                            |                                                                                                                                                                                          |
| 6       |                                                                                                                                    |                                                                                                                                                    | Repetition of treatment components. Exposure in vivo. Summary with parents.                                                                                                              |
| 7       | Exposure follow-up. Extended practice of focus shift.                                                                              |                                                                                                                                                    |                                                                                                                                                                                          |
| 8       | Exposure follow-up. Negative thoughts follow-up. Problem solving.                                                                  |                                                                                                                                                    |                                                                                                                                                                                          |
| 9       | Exposure follow-up. Learn how to say no and other self-assertive behaviors.                                                        |                                                                                                                                                    |                                                                                                                                                                                          |
| 10      |                                                                                                                                    |                                                                                                                                                    | Exposure in vivo. Social mishaps in public environment. Summary with parents.                                                                                                            |
| 11      | Exposure follow-up. Last sprint: how to get the most out of the last exposures.                                                    |                                                                                                                                                    |                                                                                                                                                                                          |
| 12      | Make a plan for relapse prevention. What did I learn? What do I want to practice further? Make an evaluation of the treatment.     |                                                                                                                                                    |                                                                                                                                                                                          |

Table 3 Means, standard deviations, pre- to post and post to 6-month follow-up comparisons, and effect sizes of all outcome measures

| Measure                                      | Pre  |       | Post |       | Pre to post comparison |                   | 6-month follow-up |       | Post to follow-up comparison |                    |
|----------------------------------------------|------|-------|------|-------|------------------------|-------------------|-------------------|-------|------------------------------|--------------------|
|                                              | M    | SD    | M    | SD    | p                      | d (95% CI)        | M                 | SD    | p                            | d (95%CI)          |
| <i>Clinician-rated</i>                       |      |       |      |       |                        |                   |                   |       |                              |                    |
| CGI-S                                        | 4.6  | 0.72  | 3.3  | 1.3   | <.001                  | 1.17 (0.61, 1.72) | 3.0               | 1.43  | .015                         | 0.22 (-0.01, 0.45) |
| C-GAS                                        | 55.5 | 6.68  | 62.0 | 8.85  | <.001                  | 0.80 (0.40, 1.21) | 65.4              | 11.14 | <.001                        | 0.30 (0.13, 0.46)  |
| <i>Self- and parent rated social anxiety</i> |      |       |      |       |                        |                   |                   |       |                              |                    |
| SPAI-C                                       | 33.4 | 9.32  | 24.5 | 11.31 | <.001                  | 0.85 (0.36, 1.34) | 21.5              | 11.24 | .023                         | 0.27 (0.02, 0.51)  |
| SPAI-P                                       | 35.3 | 8.46  | 27.2 | 11.55 | <.001                  | 0.79 (0.29, 1.28) | 25.7              | 11.01 | n.s.                         |                    |
| SPWSS avoid                                  | 4.0  | 2.38  | 1.9  | 2.22  | <.001                  | 0.91 (0.36, 1.47) | 1.8               | 1.81  | <.001                        | 0.05 (-0.4, 0.5)   |
| SPWSS s-f                                    | 4.9  | 1.74  | 2.8  | 1.44  | <.001                  | 1.31 (0.61, 2.02) | 3.3               | 2.03  | <.001                        | -0.28 (-0.83-0.26) |
| SPWSS a a                                    | 4.9  | 1.85  | 3.0  | 2.19  | <.001                  | 0.94 (0.32, 1.55) | 2.4               | 1.92  | <.001                        | 0.29 (-0.18-0.76)  |
| SPWSS pep                                    | 4.8  | 2.29  | 3.6  | 1.77  | <.001                  | 0.58 (0.02-1.15)  | 3.3               | 2.30  | <.001                        | 0.14 (-0.36-0.65)  |
| <i>Other self- and parent rated measures</i> |      |       |      |       |                        |                   |                   |       |                              |                    |
| RCADS-C SAD                                  | 18.5 | 5.69  | 14.2 | 5.87  | <.001                  | 0.74 (0.36, 1.13) | 12.4              | 6.16  | .018                         | 0.30(0.05, 0.55)   |
| RCADS-P SAD                                  | 16.4 | 5.88  | 13.2 | 5.70  | .006                   | 0.55 (0.09, 1.01) | 12.3              | 6.07  | n.s.                         |                    |
| RCADS-C                                      | 60.0 | 24.77 | 42.1 | 21.74 | <.001                  | 0.76 (0.32, 1.21) | 38.4              | 25.92 | n.s.                         |                    |
| RCADS-P                                      | 46.2 | 23.39 | 35.2 | 19.13 | .005                   | 0.51 (0.11, 0.91) | 31.8              | 22.31 | n.s.                         |                    |
| KIDSCREEN-C                                  | 32.2 | 5.59  | 34.1 | 6.07  | .036                   | 0.32 (0.06, 0.59) | 35.7              | 6.93  | n.s.                         |                    |
| KIDSCREEN-P                                  | 33.1 | 4.50  | 35.5 | 5.98  | .025                   | 0.44 (0.06, 0.82) | 35.8              | 5.85  | n.s.                         |                    |
| EWSAS-C                                      | 15.0 | 7.47  | 10.9 | 6.69  | .006                   | 0.58 (0.14, 1.01) | 7.8               | 5.28  | .004                         | 0.50 (0.1, 0.91)   |
| EWSAS-P                                      | 14.6 | 6.51  | 11.4 | 6.88  | .002                   | 0.48 (0.13, 0.83) | 9.1               | 7.44  | .002                         | 0.31 (0.1, 0.54)   |

Abbreviations: CGI-S = The Clinical Global Impression – Severity, C-GAS = Children’s Global Assessment Scale, SPAI-C/P = Social Phobia and Anxiety Inventory - Child and Parent Version, SPWSS = The Social Phobia Weekly Summary Scale, SPWSS avoid = avoidance, s-f = self-focus, a.a = anticipatory anxiety, pep = post event-processing, RCADS-C/P = The Revised Children Anxiety And Depression Scale – Child and Parent Version, RCADS-C/P SAD = The Revised Children Anxiety And Depression Scale – Child and Parent Version, SAD subscale, KIDSCREEN-C/P = The Health related quality of life questionnaire for children, adolescents and their parents, EWSAS-C/P = The Education, Work and Social Adjustment Scale – Child and Parent Version

1  
2  
3  
4  
5  
6  
7  
8  
9  
10  
11  
12  
13  
14  
15  
16  
17  
18  
19  
20  
21  
22  
23  
24  
25  
26  
27  
28  
29  
30  
31  
32  
33  
34  
35  
36  
37  
38  
39  
40  
41  
42  
43  
44  
45  
46  
47  
48  
49

For peer review only

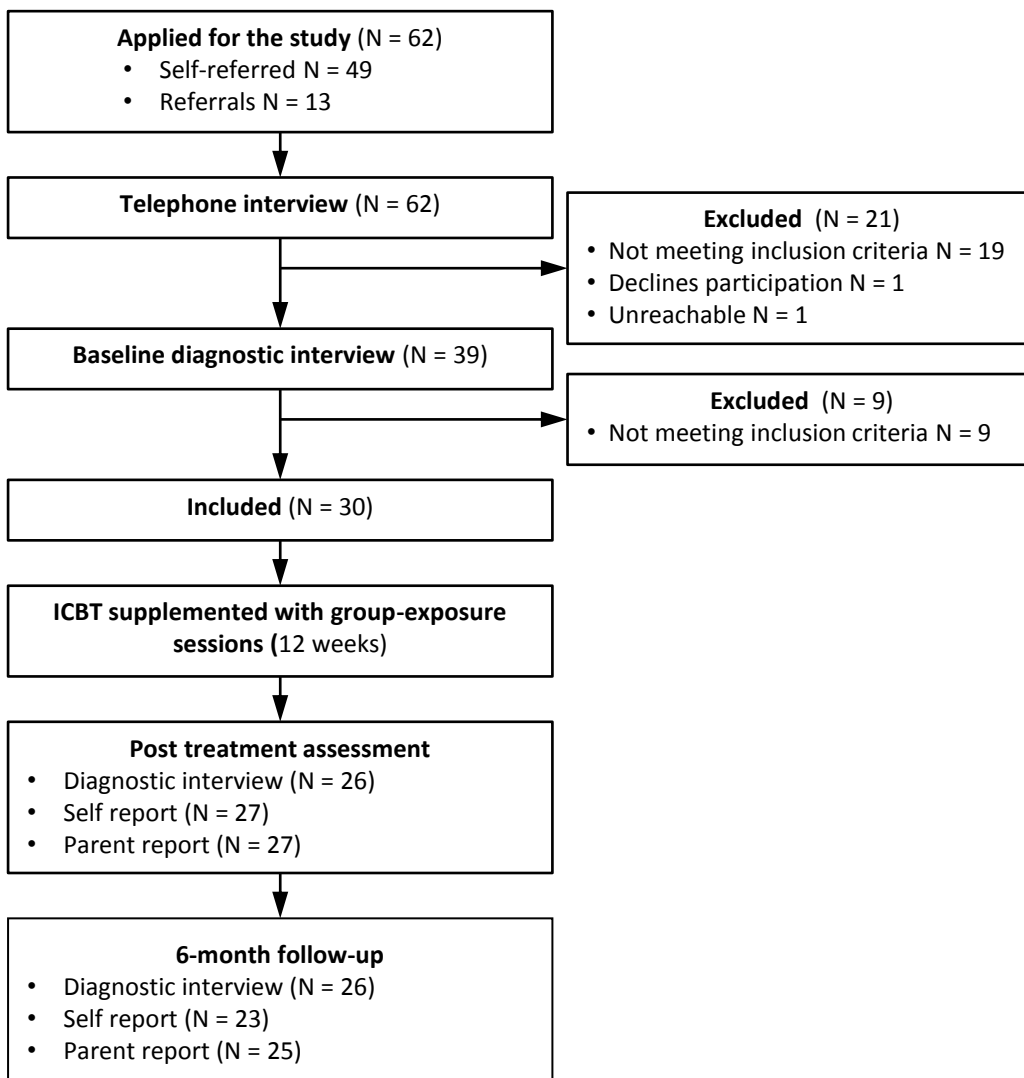

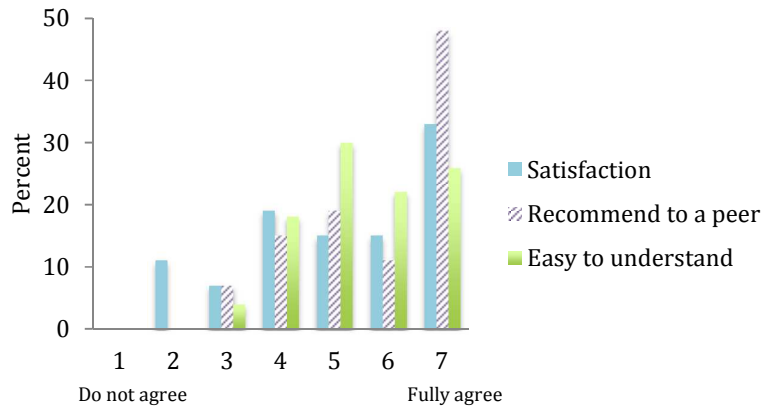

Figure 2. Adolescents' evaluation of BIP SOFT

For peer review only



# BMJ Open

## Therapist-guided Internet-delivered cognitive behavioural therapy supplemented with group-exposure sessions for adolescents with social anxiety disorder: a feasibility trial

|                                 |                                                                                                                                                                                                                                                                                                                                                                                                                                                                                                                                                                                                                                                                                                                                                                                                                                                                                                                                                                                                                                                                                                                                                                                                                      |
|---------------------------------|----------------------------------------------------------------------------------------------------------------------------------------------------------------------------------------------------------------------------------------------------------------------------------------------------------------------------------------------------------------------------------------------------------------------------------------------------------------------------------------------------------------------------------------------------------------------------------------------------------------------------------------------------------------------------------------------------------------------------------------------------------------------------------------------------------------------------------------------------------------------------------------------------------------------------------------------------------------------------------------------------------------------------------------------------------------------------------------------------------------------------------------------------------------------------------------------------------------------|
| Journal:                        | <i>BMJ Open</i>                                                                                                                                                                                                                                                                                                                                                                                                                                                                                                                                                                                                                                                                                                                                                                                                                                                                                                                                                                                                                                                                                                                                                                                                      |
| Manuscript ID                   | bmjopen-2017-018345.R1                                                                                                                                                                                                                                                                                                                                                                                                                                                                                                                                                                                                                                                                                                                                                                                                                                                                                                                                                                                                                                                                                                                                                                                               |
| Article Type:                   | Research                                                                                                                                                                                                                                                                                                                                                                                                                                                                                                                                                                                                                                                                                                                                                                                                                                                                                                                                                                                                                                                                                                                                                                                                             |
| Date Submitted by the Author:   | 21-Aug-2017                                                                                                                                                                                                                                                                                                                                                                                                                                                                                                                                                                                                                                                                                                                                                                                                                                                                                                                                                                                                                                                                                                                                                                                                          |
| Complete List of Authors:       | <p>Nordh, Martina; Karolinska Institutet Department of Clinical Neuroscience, Center for Psychiatry Research; Stockholms Lans Landsting, Stockholm health care services</p> <p>Vigerland, Sarah; Karolinska Institutet Department of Clinical Neuroscience, Center for Psychiatry Research; Stockholms Lans Landsting, Stockholm health care services</p> <p>Öst, Lars-Göran; Stockholms Universitet, Department of psychology; Karolinska Institutet Department of Clinical Neuroscience</p> <p>Ljótsson, Brjánn; Karolinska Institutet Department of Clinical Neuroscience, Center for Psychiatry Research; Stockholms Lans Landsting, Stockholm health care services</p> <p>Mataix-Cols, David; Karolinska Institutet Department of Clinical Neuroscience, Center for Psychiatry Research; Stockholms Lans Landsting, Stockholm health care services</p> <p>Serlachius, Eva; Karolinska Institutet Department of Clinical Neuroscience, Center for Psychiatry Research; Stockholms Lans Landsting, Stockholm health care services</p> <p>Högström, Jens; Karolinska Institutet Department of Clinical Neuroscience, Center for Psychiatry Research; Stockholms Lans Landsting, Stockholm health care services</p> |
| <b>Primary Subject Heading</b>: | Mental health                                                                                                                                                                                                                                                                                                                                                                                                                                                                                                                                                                                                                                                                                                                                                                                                                                                                                                                                                                                                                                                                                                                                                                                                        |
| Secondary Subject Heading:      | Health services research                                                                                                                                                                                                                                                                                                                                                                                                                                                                                                                                                                                                                                                                                                                                                                                                                                                                                                                                                                                                                                                                                                                                                                                             |
| Keywords:                       | Child & adolescent psychiatry < PSYCHIATRY, Anxiety disorders < PSYCHIATRY, MENTAL HEALTH                                                                                                                                                                                                                                                                                                                                                                                                                                                                                                                                                                                                                                                                                                                                                                                                                                                                                                                                                                                                                                                                                                                            |
|                                 |                                                                                                                                                                                                                                                                                                                                                                                                                                                                                                                                                                                                                                                                                                                                                                                                                                                                                                                                                                                                                                                                                                                                                                                                                      |

SCHOLARONE™  
Manuscripts

**Word count**

Abstract: 273

Main text: 4604

Tables: 3 Figures: 2

**Therapist-guided Internet-delivered cognitive behavioural therapy supplemented with group-exposure sessions for adolescents with social anxiety disorder: a feasibility trial**

Martina Nordh<sup>1,2</sup>, Sarah Vigerland<sup>1,2</sup>, Lars-Göran Öst<sup>3,4</sup>, Brjánn Ljótsson<sup>1,4</sup>, David Mataix-Cols<sup>1,2</sup>, Eva Serlachius<sup>1,2</sup>, Jens Högström<sup>1,2</sup>

## Author affiliations:

<sup>1</sup>Centre for Psychiatry Research, Department of Clinical Neuroscience, Karolinska Institutet, Stockholm, Sweden

<sup>2</sup>Stockholm Health Care Services, Stockholm County Council, Stockholm, Sweden

<sup>3</sup>Department of psychology, Stockholm University, Stockholm, Sweden

<sup>4</sup>Department of Clinical Neuroscience, Division of psychology, Karolinska Institutet, Stockholm, Sweden

**Correspondance to:**

Martina Nordh

E-mail: [martina.nord@ki.se](mailto:martina.nord@ki.se)

## Address:

Child and Adolescent Psychiatry Research Center  
Gävlegatan 22  
113 30 Stockholm  
Sweden

Phone: +46 08 514 522 15

**ABSTRACT**

**Objectives:** Social anxiety disorder (SAD) is one of the most common psychiatric disorders in youth, with a prevalence of about 3-4%, and increased risk of adverse long-term outcomes, such as depression. Cognitive behavioural therapy (CBT) is considered the first-line treatment for youth with SAD but many adolescents remain untreated due to limited accessibility to CBT. The aim of this study was to develop and evaluate the feasibility and preliminary efficacy of a therapist-guided Internet-delivered CBT treatment, supplemented with clinic-based group-exposure sessions (BIP SOFT).

**Design:** A proof-of-concept, open clinical trial with 6-month follow-up.

**Participants:** The trial was conducted at a child and adolescent psychiatric research clinic and participants ( $N = 30$ ) were 13-17 years old (83% girls) with a principal diagnosis of SAD.

**Intervention:** 12 weeks of intervention, consisting of nine remote therapist-guided Internet-delivered CBT sessions and three group-exposure sessions at the clinic for the adolescents and five internet-delivered sessions for the parents.

**Results:** Adolescents were generally satisfied with the treatment and the completion-rate of Internet-modules, as well as attendance at group-sessions, was high. Post-treatment assessment showed a significant decrease in clinician-, adolescent-, and parent-rated social anxiety ( $d = 1.17, 0.85, \text{ and } 0.79$ , respectively), as well as in general self- and parent-rated anxiety and depression ( $d = 0.76 \text{ and } 0.51$ ), compared with pre-treatment levels. Furthermore, 47% of participants no longer met DSM-5 criteria for SAD at post-treatment. At a 6-month follow-up, symptom reductions were maintained, or further improved, and 57% of participants no longer met criteria for SAD.

1  
2  
3 **Conclusion:** Therapist- and parent guided Internet-delivered CBT, supplemented  
4  
5 with a limited number of group-exposure sessions is a feasible and promising  
6  
7 intervention for adolescents with SAD.  
8

9  
10 **Trial registration number:** Clinicaltrials.gov registration ID NCT02576171  
11

#### 12 13 14 Strengths and limitations of this study

- 15  
16 ▪ This is the first study to investigate the feasibility and efficacy of a  
17 combined Internet-CBT and group-exposure treatment for youth with  
18 social anxiety disorder.
- 19  
20 ▪ Participants were followed up six months after the end of treatment.
- 21  
22 ▪ The study was uncontrolled which limits any causal inference about  
23 observed changes.  
24  
25  
26  
27  
28  
29  
30  
31

## 32 INTRODUCTION

33  
34 Social anxiety disorder (SAD) is characterized by an intense fear of being scrutinized and  
35 negatively evaluated in social or performance situations<sup>1</sup>. The socially anxious  
36  
37 individual is typically afraid of making mistakes, being embarrassed in front of others  
38  
39 and of showing signs of anxiety, such as blushing or trembling, and may therefore avoid  
40  
41 social and performance situations or endure them under intense distress. The disorder  
42  
43 has a median age of onset of 9.2 years <sup>2</sup> and is one of the most common mental disorders  
44  
45 among adolescents. SAD is more common in adolescent girls than in adolescent boys  
46  
47 with a female to male odds ratio of 1.58 (95%CI: 1.18-2.12)<sup>2</sup>. The 12-month prevalence  
48  
49 is 3.4% <sup>3</sup> and 8.6% of the adolescent population fulfill diagnostic criteria at some point  
50  
51 between the age of 13 and 18<sup>2</sup>. If the disorder is left untreated it tends to follow a  
52  
53 chronic course<sup>2</sup> and can lead to severe secondary consequences such as depression<sup>4</sup> and  
54  
55  
56  
57  
58  
59  
60

1  
2  
3 suicidality<sup>5</sup>, substance and alcohol dependence<sup>6</sup>, academic underperformance and  
4  
5 increased social isolation<sup>7</sup>. Consequently, SAD causes substantial impairment as well as  
6  
7 burden on patients' families and long-term societal costs<sup>8 9</sup>.

8  
9  
10 Cognitive behavioural therapy (CBT) for SAD is effective for adults<sup>10</sup> as well as for  
11  
12 children and adolescents<sup>11 12</sup> and is the first-line treatment according to international  
13  
14 clinical guidelines (e.g., the National Institute for Health and Care Excellence; NICE)<sup>13</sup>. In  
15  
16 face-to-face treatment, generic CBT has shown poorer outcomes for youth with SAD  
17  
18 compared to other anxiety disorders<sup>14</sup>, but when treatments have been tailored to  
19  
20 include SAD-specific components, such as social skills training, the reported effects have  
21  
22 been larger<sup>15 16</sup>.

23  
24  
25 Despite the high level of impairment caused by the disorder, only a small proportion  
26  
27 of adolescents with social anxiety seek help for their problems<sup>17 18</sup> and even fewer  
28  
29 receive effective treatment<sup>19</sup>. Barriers to receiving evidence-based psychological  
30  
31 treatment include limited availability of trained therapists, and practical issues such as  
32  
33 long travel distances to clinics, and the requirement to take time off school or work to  
34  
35 visit a clinic.  
36  
37

38  
39 Internet-delivered CBT (ICBT) has been suggested as a possible solution to some of  
40  
41 these barriers. It can provide the same treatment components as traditional CBT and  
42  
43 allow patients to work from home (or wherever suitable), guided by an online-therapist,  
44  
45 e.g. through e-mail or similar online communication. Treatment becomes more  
46  
47 accessible as the therapist and patient can communicate asynchronously and it may  
48  
49 increase treatment capacity, as therapist time per patient tends to be lower compared  
50  
51 with face-to-face CBT<sup>20-22</sup>. For adults with SAD, ICBT is an evidence-based treatment<sup>23</sup>  
52  
53 with at least one trial showing that ICBT is non-inferior to face-to-face CBT<sup>24</sup>. For youth,  
54  
55 ICBT is effective for mixed anxiety disorders when compared to a waitlist control<sup>25-28</sup>,  
56  
57  
58  
59  
60

1  
2  
3 with similar effects as face-to-face CBT <sup>29</sup>, suggesting that ICBT could be a suitable  
4  
5 treatment for adolescents with SAD. However, a recent study showed that only 12.8%  
6  
7 and 14.6% (in the SAD specific and generic ICBT conditions, respectively) of participants  
8  
9 were free from their SAD diagnosis at post-treatment assessment, indicating that using  
10  
11 the Internet, as the only modality to deliver CBT might not be sufficient<sup>30</sup>.  
12  
13

14 The objective of the current trial is to evaluate the feasibility and efficacy of ICBT  
15  
16 supplemented with clinic-based group-exposure sessions, for adolescents with SAD, a  
17  
18 treatment that could potentially draw on advantages from both formats, where ICBT is a  
19  
20 cost-effective and accessible format and group-sessions may ensure that key treatment  
21  
22 components, such as exposure to social situations and social skills training, are  
23  
24 conveyed properly. Main research questions are: Is the treatment (BIP SOFT) feasible  
25  
26 and acceptable with regard to adolescents' and parents' willingness to work with the  
27  
28 Internet-modules, adolescents' attendance rates at group sessions and treatment  
29  
30 satisfaction? Does the treatment reduce social anxiety symptoms and increase  
31  
32 adolescents' level of functioning and quality of life?  
33  
34  
35  
36  
37  
38

## 39 **METHOD**

40  
41 The study was conducted at a research unit within the Child and Adolescent Mental  
42  
43 Health Services in Stockholm, Sweden, and was approved by the Regional Ethical Review  
44  
45 Board in Stockholm, Sweden (2015/1383-31/2). Participants were recruited and  
46  
47 treated between October 2015 and May 2016.  
48  
49

## 50 **Participants**

51  
52 Participants were 30 adolescents, 13-17 years old, with a principal diagnosis of SAD, and  
53  
54 their parents. Table 1 gives detailed information on demographic and clinical  
55  
56 characteristics of the sample. Inclusion criteria were: a) age 13-17 years, b) principal  
57  
58  
59  
60

1  
2  
3 DSM-5 diagnosis of SAD, c) ability to read and write Swedish, d) access to a computer  
4  
5 with Internet access and e) at least one parent being able to participate in the treatment.  
6  
7 Exclusion criteria were: f) initiation or dose modification of psychotropic drug within  
8  
9 the past six weeks, g)  $\geq 5$  sessions of CBT (including exposure) within the last six  
10  
11 months, h) any ongoing psychological treatment for SAD, i) diagnosed with an autism  
12  
13 spectrum disorder, current psychosis, eating disorder, severe depression, suicidal  
14  
15 behaviour or other current severe psychiatric condition j) current substance- or alcohol  
16  
17 abuse. Adolescents excluded due to other severe psychiatric conditions, such as severe  
18  
19 depression or suicidality, were referred to more suitable treatments.  
20  
21

22  
23 Participants were mainly recruited through advertisement in a local paper. The  
24  
25 advertisement included a website address ([www.bup.se/bip](http://www.bup.se/bip)) where interested families  
26  
27 could get study information and sign up. Clinicians working in the child- and adolescent  
28  
29 health services could also refer patients to the trial.  
30  
31

32 To achieve sufficient power and to be able to detect a within-group effect size of  $d =$   
33  
34 0.60 from pre to post with a power of 0.85 and  $\alpha = 0.05$ , allowing for a 10% drop out, we  
35  
36 included 30 participants in the study.  
37  
38

39  
40 -----  
41 Insert Table 1 here  
42  
43 -----  
44

## 45 **Measures**

### 46 *Primary outcome measures*

47  
48 The Clinical Global Impression – Severity (CGI-S)<sup>31</sup> is a clinician rating of symptom  
49  
50 severity, ranging from 1 (“normal, not mentally ill”) to 7 (“extremely ill”). The CGI-S  
51  
52 was administered at baseline by the treating therapist. At post-treatment and the 6-  
53  
54 month follow-up, another clinician than the one being responsible for the treatment  
55  
56  
57  
58  
59  
60

1  
2  
3 administered the CGIS-S.  
4  
5  
6

7  
8 *Secondary outcome measures*

9  
10 Mini International Neuropsychiatric Interview for Children and Adolescents (M.I.N.I.  
11 KID)<sup>32</sup>, was used to determine presence of SAD, as well as comorbid conditions. In  
12 addition, the SAD section of the Anxiety Disorders Interview Schedule for DSM-IV-Child  
13 Version (ADIS-C)<sup>33</sup> was used to further confirm SAD-diagnosis and to assess the  
14 intensity of SAD symptoms. An independent rater (a clinical psychologist, not part of the  
15 research group, blind to whether the adolescent had been included in the study or not)  
16 watched recordings of the baseline interviews and reassessed 20% of them (both  
17 included and excluded adolescents), generating an excellent inter-rater reliability at pre-  
18 treatment for SAD-diagnosis ( $\kappa = 1.0$ ) and a fair inter-rater reliability for comorbidity ( $\kappa$   
19 = 0.46,  $p < .05$ ).  
20  
21  
22  
23  
24  
25  
26  
27  
28  
29  
30  
31

32 Clinical global impression – Improvement (CGI-I)<sup>31</sup> is a clinician rating of the  
33 participant's change in symptom severity relative to baseline, ranging from 1 ("very  
34 much improved") to 7 ("very much worse"). The Children's Global Assessment Scale  
35 (CGAS)<sup>34</sup> is a clinician rating of global functioning (scale 0-100), with higher rating  
36 indicating higher level of functioning. The M.I.N.I. KID and CGAS were administered at  
37 baseline, post-treatment and at the 6-month follow-up, whereas the CGI-I was  
38 administered post-treatment and at the 6-month follow-up.  
39  
40  
41  
42  
43  
44  
45  
46  
47

48 Social Phobia and Anxiety Inventory - Child and Parent Version (SPAI-C/P)<sup>35</sup> is a 26-  
49 item self-report measure evaluating aspects of SAD on a 3-point scale, where a score of  
50  $\geq 18$  is considered the clinical level of social anxiety. The Social Phobia Weekly Summary  
51 Scale (SPWSS) is a five-item self-report scale<sup>36,37</sup> measuring dimensions of SAD (social  
52 anxiety, avoidance, self-focused attention, anticipatory processing and post-event  
53  
54  
55  
56  
57  
58  
59  
60



1  
2  
3 processing). The SPAI-C/P and the SPWSS were administered at baseline, every third  
4  
5 week during treatment, post-treatment as well as at the 6-month follow-up.  
6

7 The Revised Children Anxiety And Depression Scale – Child and Parent Version  
8 (RCADS-C/P)<sup>38</sup> is a 47-item self-report measure evaluating anxiety disorders (including  
9 one subscale for SAD) and depression on a 4-point scale, ranging from *never* to *always*.  
10  
11 In the current trial one item regarding suicidality, with three options (“I do not think  
12 about killing myself”, “I think about killing myself, but would never do it” or “I want to  
13 kill myself”), was added at the end of the RCADS-C/P. The Education, Work and Social  
14 Adjustment Scale – Child and Parent Version (EWSAS-C/P)<sup>39 40</sup> is a 5-item self-report  
15 scale measuring functional impairment on a 9-point scale (higher rating indicating more  
16 impairment). The RCADS-C/P and the EWSAS-C/P were administered at baseline, after  
17 six weeks of treatment, post-treatment as well as at the 6-month follow-up.  
18  
19  
20  
21  
22  
23  
24  
25  
26  
27  
28  
29

30 The Health related quality of life questionnaire for children, adolescents and their  
31 parents (KIDSCREEN-10)<sup>41</sup> is a self-report measure assessing health related quality of  
32 life. The parent-rated measure Trimbos/iMTA questionnaire for Costs associated with  
33 Psychiatric Illness – Child version (TiC-P)<sup>42</sup> covers e.g. production loss among parents  
34 due to health problems in the child. The KIDSCREEN-10 and the TiC-P were  
35 administered at baseline, post-treatment and at the 6-month follow-up.  
36  
37  
38  
39  
40  
41  
42  
43  
44  
45

#### 46 *Feasibility measures, adverse events and therapist time*

47  
48 The Technology Acceptance Scale – child and parent version (TAS-C/P) is a self-report  
49 measure adapted from Venkatesh et al.<sup>43</sup>, which measures the usefulness, acceptability  
50 and satisfaction of the website through which the Internet-modules of the treatment  
51 were delivered. The TAS-C/P was administered after three weeks of treatment and post-  
52 treatment.  
53  
54  
55  
56  
57  
58  
59  
60

1  
2  
3 At post-treatment, adolescents and parents were asked to report any negative  
4 experiences or adverse events over the course of treatment as well as to what extent the  
5 negative event had affected the adolescent's wellbeing.  
6  
7  
8

9  
10 Amount of therapist time per participant was logged automatically through the  
11 Internet-treatment platform.  
12  
13

## 14 15 16 **Procedure**

17  
18 Figure 1 gives an overview of inclusion procedures and assessment points. Families who  
19 applied to the study were contacted by telephone and a short screening interview was  
20 conducted. Eligible families were invited to diagnostic assessment at the clinic. After  
21 thorough information about the study, adolescents gave verbal assent to participate and  
22 written informed consent was obtained from parents. The screening interview M.I.N.I.  
23 KID (with the supplement of the SAD section of the ADIS-C) was then conducted. The  
24 therapist who conducted the baseline assessment was responsible for the treatment of  
25 the participant.  
26  
27  
28  
29  
30  
31  
32  
33  
34  
35

36  
37 Adolescents with a principal diagnosis of SAD were included and adolescents and  
38 parents completed baseline self-report measures online through the treatment platform.  
39 In each family, one of the parents was assigned the main responsibility to respond to the  
40 parent-report measures at each assessment point throughout the study. Adolescents and  
41 parents had separate user accounts and a two-factor authentication (an individual  
42 password and a single-use code sent to the user's cellular phone) gave access to the  
43 online platform.  
44  
45  
46  
47  
48  
49  
50  
51

52  
53 Self- and parent rated measures administered during the treatment (SPAI C/P,  
54 SPWSS, RCADS C/P and EWSAS C/P) were completed online.  
55  
56  
57  
58  
59  
60

1  
2  
3 At post-treatment and at the 6-month follow-up all participating adolescents and  
4  
5 parents were invited back to the clinic for a diagnostic assessment. To reduce the risk of  
6  
7 biased assessment, a clinician that had not been responsible for the participant's  
8  
9 treatment conducted the post-treatment and follow-up assessments. All self-assessment  
10  
11 scales were administered online post-treatment and at follow-up. Families who could  
12  
13 not come to the clinic for post-treatment assessment (n = 1) and 6-month follow-up (n =  
14  
15 3) were assessed over the telephone.  
16  
17  
18  
19 -----

20  
21 Insert Figure 1 here  
22  
23 -----  
24

## 25 **Intervention**

26  
27 The intervention was 12 weeks of ICBT supplemented with group-exposure, comprising  
28  
29 nine Internet-delivered modules completed individually from home, and three group-  
30  
31 exposure sessions at the clinic (Table 2). The online treatment platform used in this  
32  
33 study was developed for delivery of ICBT and has been tested in a number of previous  
34  
35 studies for different psychiatric disorders in youth<sup>22 28 44-46</sup>. The current treatment (BIP  
36  
37 SOFT) was based on the cognitive-behavioural model by Rapee and Heimberg<sup>47</sup> and to  
38  
39 some extent on the cognitive model by Clark and Wells<sup>48</sup>. The treatment manual was  
40  
41 developed by the authors and contains CBT components commonly used for SAD in  
42  
43 youth<sup>15 49 50</sup>, such as exposure, coping strategies and social skills training. The group  
44  
45 sessions were mostly based on the Albano and DiBartolo group-CBT manual for  
46  
47 adolescent SAD<sup>50</sup>. Therapists in the study were three clinical psychologists and two  
48  
49 master students at their final year of training in clinical psychology.  
50  
51  
52

53  
54 The Internet-modules included educative texts, animations, audio clips and exercises.

55  
56 The parental part of the intervention consisted of five Internet-modules with parent-  
57  
58  
59  
60

1  
2  
3 specific topics such as “parental traps” (e.g., compensating for the adolescent in social  
4 situations by for instance speaking for him/her) and doing functional analyses of such  
5 parental accommodation (Table 2). Parents were encouraged to be actively involved in  
6 their adolescent’s treatment and discuss with the adolescent how they should support  
7 him or her throughout the treatment, e.g. during exposure exercises. Parents were also  
8 encouraged to bring up parent-specific topics with their therapist, for example how to  
9 support the adolescent before or during exposures. Parents could send messages to the  
10 therapist throughout the 12 weeks of treatment. Adolescents and parents were  
11 instructed to log in and complete one module each week. The modules were assigned in  
12 a predetermined order and therefore, all modules but the first were initially locked.  
13 Once the participant completed a module, the therapist made the next one available.  
14  
15  
16  
17  
18  
19  
20  
21  
22  
23  
24  
25  
26  
27

28 The therapists had asynchronous contact online with adolescents and parents every  
29 week, commenting on their progress on work sheets and through a built in message  
30 function. Therapists were instructed to log in and provide feedback to their families  
31 three times per week. If necessary, therapists had telephone contact with families, e.g., if  
32 they hadn’t logged in during the last week or if mid-treatment self-reports exceeded a  
33 cut-off for depression (>11 on RCADS-C depression subscale) or suicidality.  
34  
35  
36  
37  
38  
39  
40

41 The group-exposure sessions (at week 4, 6 and 10) ensured that key components of  
42 the treatment were demonstrated in a correct way and that participants could practice  
43 e.g. exposure under observation of a therapist. To ensure large enough group sizes,  
44 cohorts of six participants started the treatment at the same time. The group sessions  
45 were two hours long and led by two of the clinical psychologists.  
46  
47  
48  
49  
50  
51

52 -----

53  
54  
55 Insert Table 2 here

56  
57 -----  
58  
59  
60

## Statistical analysis

All analyses were conducted in SPSS Version 23.

Cohen's kappa coefficient ( $\kappa$ )<sup>51</sup> was used to calculate inter-rater reliability for SAD-diagnosis and comorbidity at pre-treatment assessment. The level of reliability is interpreted as poor when  $\kappa < 0.40$ , fair when  $\kappa$  is 0.40-0.59, good when  $\kappa$  is 0.60-0.74 and excellent when  $\kappa > 0.74$ <sup>52</sup>.

Linear mixed models were used to analyse changes from pre- to post-treatment, and from post-treatment to 6-month follow-up. Mixed model analyses use all available data and account for correlations between measurements within the same subject<sup>53</sup>. Thus, missing data is handled within the model. All mixed models in this study included a fixed effect for time (pre, post and 6-month follow-up) and a random effect for individual subjects. Potential missing bias was investigated using *t*-tests that compared the baseline characteristics of those who had complete data at post-treatment with those who had missing data. For SPAI C/P and SPWSS three mid-treatment (week 3, 6 and 9) time points were included in the analyses, and for RCADS C/P and EWSAS C/P one mid-treatment (week 6) time point was included in the analyses.

Effect sizes are reported as Cohen's  $d = (M_1 - M_2 / SD_{\text{pooled}})$ . Effect sizes are defined according to Cohen's suggested levels, small ( $d \geq 0.20$ ), moderate ( $d \geq 0.50$ ) and large ( $d \geq 0.80$ )<sup>54</sup>.

## RESULTS

### Response rate and feasibility

Mid-treatment measures were completed by 97% of the participating families at week three, 83% at week six and 70% at week nine. Post-treatment and 6-month follow-up measures were completed by 90% and 83% of the participating families, respectively. T-

1  
2  
3 tests comparing participants with missing versus complete data points on baseline  
4  
5 characteristics revealed no statistically significant differences.  
6

7 Adolescents completed on average 5.7 ( $sd = 2.1$ ) of the nine Internet-modules and  
8  
9 parents completed on average 4.4 ( $sd = 1.0$ ) of their five modules. The frequency of  
10  
11 completed modules by the adolescents was distributed as follows: 20% ( $n = 6$ )  
12  
13 completed 2-3 modules, 43% ( $n = 13$ ) completed 4-6 modules and 37% ( $n = 11$ )  
14  
15 completed 7-9 modules. None completed fewer than two modules.  
16  
17

18 Attendance at the group-sessions were 70% (session 1), 77% (session 2) and 63%  
19  
20 (session 3) respectively. Two thirds of the participants attended two or more group  
21  
22 sessions and only 10% attended none.  
23  
24

25 None of the adolescents meeting inclusion criteria at baseline assessment declined  
26  
27 participation, which indicates good acceptability of the offered treatment.  
28  
29

30 Figure 2 illustrates that a majority of the adolescents were satisfied with the  
31  
32 treatment, would recommend the treatment to a friend and found the program easy to  
33  
34 understand. Furthermore, most of the participating adolescents found the treatment's  
35  
36 online platform easy to use, with a mean rating of 5.6 (range 4-7) on the 7-point TAS  
37  
38 scale item (where 7 indicates full agreement with the statement "The program was easy  
39  
40 to use").  
41  
42  
43

44 -----  
45  
46 Insert Figure 2 here  
47  
48 -----  
49

### 50 **Clinician support**

51  
52 The average time a clinician spent giving feedback and guidance to participants  
53  
54 (including time spent on the adolescent *and* parent) was 19.5 minutes per week for the  
55  
56 Internet-modules. Group sessions required two hours of therapist time per participant  
57  
58  
59  
60

1  
2  
3 in total during the 12 weeks, which corresponds to 10 minutes per week and  
4  
5 participant. In total thus, each family got 29.5 minutes of therapist time, per week.  
6  
7

### 8 9 10 **Changes in clinical outcomes from pre- to post-treatment**

11 Means, standard deviations and effect sizes for pre to post changes, are presented in  
12 Table 3. Intention-to-treat analyses of the primary outcome measure (CGI-S) showed a  
13 significant decrease of SAD severity from pre- to post-treatment,  $t(26.05) = 5.62, p < .001$ ,  
14 with a large effect size,  $d = 1.17$  (95%CI 0.61,1.72). For all secondary outcome measures,  
15 analyses revealed significant improvements with moderate to large effect sizes, with the  
16 exception of quality of life (KIDSCREEN-C/P) where a small effect was observed. At post-  
17 treatment, 47% of the participants ( $n = 14$ ) no longer met diagnostic criteria for SAD,  
18 according to DSM-5 criteria and a CGI-rating  $< 4$  (level of severity and functional  
19 impairment below diagnostic threshold) and 30% ( $n = 9$ ) scored  $\leq 18$  on SPAI-C (cut-off  
20 for clinical level of social anxiety). On the clinician rated CGI-I 8% ( $n = 2$ ) were “very  
21 much improved”, 23% ( $n = 6$ ) “much improved”, 42% ( $n = 11$ ) “minimally improved”,  
22 23% ( $n = 6$ ) “not changed” and 4% ( $n = 1$ ) “minimally worse”.  
23  
24  
25  
26  
27  
28  
29  
30  
31  
32  
33  
34  
35  
36  
37  
38  
39  
40

### 41 **Changes in clinical outcomes from post-treatment to 6-month follow-up**

42 Table 3 gives an overview of means, standard deviations and effect sizes from post-  
43 treatment to the 6-month follow-up. The improvements seen at post-treatment were  
44 generally maintained and further augmented at the 6-month follow-up with small effect  
45 sizes, except for self-focus (SPWSS) that deteriorated slightly. The primary outcome  
46 measure (CGI-S) showed a significant decrease of SAD severity from post-treatment to  
47 6-month follow up,  $t(25.45) = 2.60, p < .05$ , with a small effect size,  $d = 0.22$  (95%CI -0.01,  
48  
49  
50  
51  
52  
53  
54  
55  
56  
57  
58  
59  
60

1  
2  
3 0.45). At follow-up, 57% ( $n = 17$ ) no longer met diagnostic criteria for SAD and 37% ( $n =$   
4  
5 11) scored  $\leq 18$  on SPAI-C.

6  
7 Comparison of pre-treatment and 6-month follow-up levels of social anxiety showed  
8  
9 overall improvements with large effect-sizes, CGI-S:  $t(27.23) = 6.24, p < .001, d = 1.36$   
10  
11 (95%CI 0.71, 2.01), SPAI-C:  $t(27.63) = 5.50, p < .001, d = 0.95$  (95%CI 0.51, 1.39) and  
12  
13 SPAI-P:  $t(26.08) = 5.57, p < .001, d = 1.14$  (95%CI 0.57, 1.72). Clinician-rated CGI-I  
14  
15 indicated that, of those who participated in the 6-month follow-up assessment, 19% ( $n =$   
16  
17 5) were “very much improved”, 31% ( $n = 8$ ) “much improved”, 38% ( $n = 10$ ) “minimally  
18  
19 improved”, 4% ( $n = 1$ ) “not changed” and 8% ( $n = 2$ ) “minimally worse”, compared to  
20  
21  
22  
23  
24 baseline.

### 25 **Post-hoc analyses**

26  
27 The proportion of parents reporting that they had stayed home from work during the  
28  
29 last month due to their adolescent’s health problems was 27% before treatment and  
30  
31 13% at 6-month follow-up. Of the adolescents, 50% had stayed home from school during  
32  
33 the last month due to health problems before treatment and 33% at 6-month follow-up.  
34  
35 At 6-month follow-up, six participants reported that they had received additional  
36  
37 treatment for social anxiety; two participants (7%) got CBT and four participants (13%)  
38  
39 had initiated or increased SSRI medication. All these participants fulfilled diagnostic  
40  
41 criteria for SAD at post treatment assessment and five out of six still fulfilled diagnostic  
42  
43 criteria for SAD at follow-up.  
44  
45  
46

47  
48 Half of all participants ( $n=15$ ) reported that they had used strategies from the  
49  
50 treatment since post-treatment assessment, referring to exposure, coping strategies  
51  
52 (such as breathing exercises and focus shift) and cognitive techniques as the most  
53  
54 common ones.  
55  
56  
57  
58  
59  
60



### Adverse events

Seven adolescents (23%) reported having experienced some negative event during the course of treatment. These events included increased stress due to the limited time to work with treatment modules ( $n=4$ ; 13%), increased social anxiety ( $n=1$ ; 3%), increased panic anxiety ( $n=1$ ; 3%) and increased depression and negative thoughts ( $n=1$ ; 3%). Those who reported increased stress and anxiety associated these symptoms with the first weeks of treatment and typically described a decrease as treatment continued. Two adolescents reported that the negative event (increased negative thoughts in one case and increased panic anxiety in the other case) still had some impact on their wellbeing at the end of treatment.

### DISCUSSION

To our knowledge this is the first study evaluating the feasibility and efficacy of therapist- and parent-guided, Internet-delivered cognitive behavioural therapy (ICBT), supplemented with group-exposure sessions, for adolescents with SAD. The results suggest that such a combined treatment format is both feasible and potentially efficacious and that the improvements are maintained at least 6 months beyond treatment termination. Feasibility was indicated by the high proportion of participants who reported satisfaction with the program, and who would recommend it to a peer, as well as by the high attendance rate at group-sessions and good completion of online-sessions. The results showed substantial reductions of social anxiety symptoms on all clinician-, adolescent- and parent-rated measures at post treatment, as well as improvements in secondary outcomes such as overall anxiety and level of functioning. These symptom reductions were maintained or further improved at the 6-month follow-up.

1  
2  
3 The adolescents completed on average nearly two thirds of the 9 online-modules  
4 which is more than in previous studies on ICBT for youth with SAD where participants  
5 completed less than half of the modules on average<sup>26 30</sup>. It is possible that the face-to-  
6 face component (group-based exposure sessions) in the present study influenced the  
7 working pace with the Internet-modules as participants were recommended to  
8 complete the preceding modules before attending group sessions. Even if completion of  
9 previous modules was not a prerequisite for attendance at group sessions, participants  
10 tended to complete them before attending the sessions. Participants also had peer and  
11 therapist support in the group on aspects of the Internet-delivered modules that they  
12 found difficult (e.g., designing an idiosyncratic exposure hierarchy), which might have  
13 led to more motivation to work with modules *after* group sessions. It has been proposed  
14 that socially anxious children and adolescents have a tendency to avoid practicing skills  
15 on their own that they have learned online, such as conducting in-vivo exposure<sup>30</sup>. It  
16 could therefore be hypothesized that the group-sessions in this study enhanced the  
17 participants' inclination to practice skills at home as a consequence of being offered  
18 intensive therapist guidance and direct feedback during group-based exposure.  
19  
20  
21  
22  
23  
24  
25  
26  
27  
28  
29  
30  
31  
32  
33  
34  
35  
36  
37  
38

39 Forty seven per cent of participants no longer met diagnostic criteria for SAD after  
40 treatment, a proportion that further increased to 57% at 6-month follow-up. This is in  
41 line with levels reported in studies evaluating face-to-face CBT for youth with SAD<sup>15 49</sup>  
42 <sup>55-57</sup> and higher than strictly Internet-delivered CBT for youth with SAD<sup>30</sup>. A recent trial  
43 of ICBT for youth with SAD reported a relatively limited impact on the clinical diagnosis  
44 of SAD (in the two active treatment conditions 12.8 and 14.6% at post-treatment and  
45 29.8% and 35.4 % at 6-month follow-up, no longer met diagnostic criteria for SAD)<sup>30</sup>  
46 and the authors suggest that stand-alone ICBT might not be enough for youth with  
47 SAD<sup>30</sup>. It is tempting to attribute the better outcomes in our trial to the addition of  
48  
49  
50  
51  
52  
53  
54  
55  
56  
57  
58  
59  
60

1  
2  
3 group-based exposure sessions to the ICBT protocol, though this hypothesis remains to  
4  
5 be formally evaluated. Discrepancies between our and previous results may also be  
6  
7 attributable to differences in study samples, study design or other methodological  
8  
9 aspects.  
10

11  
12 Therapists in this study spent less than 20 minutes per family and week, on the  
13  
14 Internet-delivered treatment, which is comparable to previous ICBT trials for youth<sup>21 22</sup>.  
15  
16 Although the group sessions added another 10 minutes per family and week in the  
17  
18 present trial, group-exposure supplemented ICBT should still be considered a time-  
19  
20 efficient intervention compared with face-to-face CBT where the therapist time per  
21  
22 family and week usually ranges from 45-60 minutes.  
23  
24

25  
26 Around a fifth of the participants reported a negative event during the course of the  
27  
28 treatment. Some of the events were expected, such as increased social anxiety when  
29  
30 exposure was initiated. Reports of increased stress were also associated with the first  
31  
32 weeks of the treatment and can be interpreted as an initial difficulty combining  
33  
34 treatment with other demands such as schoolwork. Two participants reported having  
35  
36 experienced some negative events that affected their wellbeing beyond the treatment  
37  
38 termination but these participants still benefited from treatment.  
39  
40

41  
42 Overall, the treatment seems feasible and possibly efficacious for adolescents with  
43  
44 SAD and their parents, but to be considered for implementation in regular care, an  
45  
46 intervention must also be feasible from an organizational point of view. A possible  
47  
48 drawback with the addition of group-exposure to ICBT is that it limits the flexibility of  
49  
50 the intervention. For instance, several patients must be recruited and able to commence  
51  
52 treatment at the same time. SAD is a challenging disorder to treat and interventions  
53  
54 aspiring to be effective may need to include direct and frequent therapist guidance. On  
55  
56 the other hand, development of new treatments should not only consider treatment  
57  
58  
59  
60

1  
2  
3 efficacy, but also accessibility, flexibility and cost effectiveness. A possible alternative to  
4  
5 group-based exposure sessions is to add other forms of direct communication between  
6  
7 patients and ICBT-therapists, e.g. video conferencing or equivalent, something that  
8  
9 future studies should investigate further.  
10

### 11 12 13 **Limitations**

14  
15 Although this feasibility trial has several strengths, some important limitations need to  
16  
17 be considered when interpreting the results. Causal inferences of observed changes are  
18  
19 not possible due to lack of a control condition. Thus, improvement could be an effect of  
20  
21 non-specific factors such as the therapist attention or of the passage of time. However,  
22  
23 SAD has been shown to commonly follow a chronic course when left untreated<sup>2</sup> and it is  
24  
25 not likely that spontaneous remission would explain a significant part of the  
26  
27 improvements in the study. Additionally, results were maintained and slightly improved  
28  
29 at follow-up, indicating that treatment gains were stable over time, even after the  
30  
31 attention from a therapist had ceased. A small proportion of the participants did seek  
32  
33 additional care between post-treatment and 6-month follow-up, which could have  
34  
35 affected the results. However, these participants continued to report high levels of social  
36  
37 anxiety at follow-up, implying that additional care had limited impact on the long-term  
38  
39 outcome. Although social anxiety is generally more common among women, the current  
40  
41 sample had an overrepresentation of girls. The effect of gender on the results in this trial  
42  
43 is unclear and may be further analyzed in future trials with larger samples.  
44  
45  
46  
47  
48  
49

50 Another limitation concerns assessment at post-treatment and follow-up. Although  
51  
52 attempts to reduce bias were made by having these assessments conducted by clinicians  
53  
54 not involved in the treatment, assessors were not blind to the fact that the participant  
55  
56 had received treatment.  
57  
58  
59  
60

## Conclusions

This is the first study of therapist- and parent-guided ICBT supplemented with group-exposure for adolescents with SAD. The intervention was highly acceptable to the families and significantly reduced social anxiety symptoms up to 6-month follow-up. Participants were generally satisfied with the treatment and the completion-rate of Internet-modules and attendance at group sessions were high, indicating that the treatment is feasible and acceptable to the SAD youth population. Furthermore, per-patient therapist time was limited, even considering the time spent on group-sessions; thus, ICBT supplemented with group-based exposure sessions might be cost-effective when compared to traditional face-to-face CBT. Further controlled trials are needed.

**Acknowledgements** The authors would like to thank Ulrika Thulin for invaluable help with writing the treatment modules, and Cornelia Hanqvist and Jon Juselius for assisting with providing the treatment.

**Contributors** The study was designed by MN, SV, DMC, ES and JH. MN was the project manager in collaboration with JH. MN wrote the treatment modules and provided the treatment in collaboration with JH and SV. All statistical analyses were conducted by JH and MN. MN drafted the manuscript in collaboration with JH. The manuscript was reviewed and revised by SV, ES, DMC, BL and LGÖ. All authors have read and approved the final manuscript.

**Funding** This work was supported by the Stockholm County Council (PPG project 20150032; HSNV 140 99; HSN 1011-1176) and the Swedish Research Council and Swedish Research Council for Health, Working Life and Welfare (Forte 2014-4052)

**Competing interests** None.

**Data sharing statement** No additional data are available.

**Open Access** This is an Open Access article distributed in accordance with the Creative Commons Attribution Non Commercial (CC BY-NC 4.0) license, which permits others to distribute, remix, adapt, build upon this work non-commercially, and license their derivative works on different terms, provided

1  
2  
3  
4  
5  
6  
7  
8  
9  
10  
11  
12  
13  
14  
15  
16  
17  
18  
19  
20  
21  
22  
23  
24  
25  
26  
27  
28  
29  
30  
31  
32  
33  
34  
35  
36  
37  
38  
39  
40  
41  
42  
43  
44  
45  
46  
47  
48  
49  
50  
51  
52  
53  
54  
55  
56  
57  
58  
59  
60

the original work is properly cited and the use is non-commercial. See:

<http://creativecommons.org/licenses/by-nc/4.0/>

For peer review only

## References

1. Association AP. Diagnostic and statistical manual of mental disorders (DSM-5®): American Psychiatric Pub 2013.
2. Burstein M, He JP, Kattan G, et al. Social phobia and subtypes in the national comorbidity survey-adolescent supplement: prevalence, correlates, and comorbidity. *J Am Acad Child Adolesc Psychiatry* 2011;50(9):870-80. doi: 10.1016/j.jaac.2011.06.005
3. Lawrence D, Johnson S, Hafekost J, et al. The Mental Health of Children and Adolescents: Report on the Second Australian Child and Adolescent Survey of Mental Health and Wellbeing. 2015
4. Beesdo K, Bittner A, Pine DS, et al. Incidence of social anxiety disorder and the consistent risk for secondary depression in the first three decades of life. *Arch Gen Psychiatry* 2007;64(8):903-12.
5. Katzelnick DJ, Kobak KA, DeLeire T, et al. Impact of generalized social anxiety disorder in managed care. *Am J Psychiatry* 2001;158(12):1999-2007.
6. Buckner JD, Schmidt NB, Lang AR, et al. Specificity of social anxiety disorder as a risk factor for alcohol and cannabis dependence. *J Psychiatr Res* 2008;42(3):230-39.
7. Beidel DC, Turner SM, Morris TL. Psychopathology of childhood social phobia. *J Am Acad Child Adolesc Psychiatry* 1999;38(6):643-50. doi: 10.1097/00004583-199906000-00010
8. Acarturk C, Smit F, De Graaf R, et al. Economic costs of social phobia: a population-based study. *J Affect Disord* 2009;115(3):421-29.
9. Patel A, Knapp M, Henderson J, et al. The economic consequences of social phobia. *J Affect Disord* 2002;68(2):221-33.
10. Hofmann SG, Smits JA. Cognitive-behavioral therapy for adult anxiety disorders: a meta-analysis of randomized placebo-controlled trials. *J Clin Psychiatry* 2008;69(4):621.
11. Scaini S, Belotti R, Ogliari A, et al. A comprehensive meta-analysis of cognitive-behavioral interventions for social anxiety disorder in children and adolescents. *J Anxiety Disord* 2016;42:105-12. doi: 10.1016/j.janxdis.2016.05.008
12. Segool NK, Carlson JS. Efficacy of cognitive - behavioral and pharmacological treatments for children with social anxiety. *Depress Anxiety* 2008;25(7):620-31.
13. Pilling S, Mayo-Wilson E, Mavranouzouli I, et al. Recognition, assessment and treatment of social anxiety disorder: summary of NICE guidance. *BMJ* 2013;346:f2541.
14. Hudson JL, Rapee RM, Lyneham HJ, et al. Comparing outcomes for children with different anxiety disorders following cognitive behavioural therapy. *Behav Res Ther* 2015;72:30-37. doi: <http://dx.doi.org/10.1016/j.brat.2015.06.007>
15. Beidel DC, Turner SM, Morris TL. Behavioral treatment of childhood social phobia. *J Consult Clin Psychol* 2000;68(6):1072-80.
16. Beidel DC, Turner SM, Sallee FR, et al. SET-C versus fluoxetine in the treatment of childhood social phobia. *J Am Acad Child Adolesc Psychiatry* 2007;46(12):1622-32. doi: 10.1097/chi.0b013e318154bb57
17. Essau CA, Conradt J, Petermann F. Frequency and comorbidity of social phobia and social fears in adolescents. *Behav Res Ther* 1999;37(9):831-43.
18. Wittchen HU, Stein MB, Kessler RC. Social fears and social phobia in a community sample of adolescents and young adults: prevalence, risk factors and comorbidity. *Psychol Med* 1999;29(2):309-23. doi: 10.1017/s0033291798008174

19. Merikangas KR, He J-p, Burstein M, et al. Service utilization for lifetime mental disorders in US adolescents: Results of the National Comorbidity Survey-Adolescent Supplement (NCS-A). *J Am Acad Child Adolesc Psychiatry* 2011;50(1):32-45.
20. Hedman E, Andersson E, Ljotsson B, et al. Cost-effectiveness of Internet-based cognitive behavior therapy vs. cognitive behavioral group therapy for social anxiety disorder: results from a randomized controlled trial. *Behav Res Ther* 2011;49(11):729-36. doi: 10.1016/j.brat.2011.07.009
21. Lenhard F, Andersson E, Mataix-Cols D, et al. Therapist-Guided, Internet-Delivered Cognitive-Behavioral Therapy for Adolescents With Obsessive-Compulsive Disorder: A Randomized Controlled Trial. *J Am Acad Child Adolesc Psychiatry* 2017;56(1):10-19.e2. doi: 10.1016/j.jaac.2016.09.515
22. Lenhard F, Vigerland S, Andersson E, et al. Internet-delivered cognitive behavior therapy for adolescents with obsessive-compulsive disorder: an open trial. *PLoS One* 2014;9(6):e100773. doi: 10.1371/journal.pone.0100773
23. Hedman E, Ljótsson B, Lindfors N. Cognitive behavior therapy via the Internet: a systematic review of applications, clinical efficacy and cost-effectiveness. *Expert Rev Pharmacoecon Outcomes Res* 2012;12(6):745-64.
24. Hedman E, Andersson G, Ljotsson B, et al. Internet-based cognitive behavior therapy vs. cognitive behavioral group therapy for social anxiety disorder: a randomized controlled non-inferiority trial. *PLoS One* 2011;6(3):e18001. doi: 10.1371/journal.pone.0018001
25. March S, Spence SH, Donovan CL. The efficacy of an internet-based cognitive-behavioral therapy intervention for child anxiety disorders. *J Pediatr Psychol* 2009;34(5):474-87.
26. Tillfors M, Andersson G, Ekselius L, et al. A randomized trial of Internet-delivered treatment for social anxiety disorder in high school students. *Cogn Behav Ther* 2011;40(2):147-57. doi: 10.1080/16506073.2011.555486
27. Donovan CL, March S. Online CBT for preschool anxiety disorders: a randomised control trial. *Behav Res Ther* 2014;58:24-35.
28. Vigerland S, Ljótsson B, Thulin U, et al. Internet-delivered cognitive behavioural therapy for children with anxiety disorders: A randomised controlled trial. *Behav Res Ther* 2016;76:47-56.
29. Spence SH, Donovan CL, March S, et al. A randomized controlled trial of online versus clinic-based CBT for adolescent anxiety. *J Consult Clin Psychol* 2011;79(5):629-42. doi: 10.1037/a0024512
30. Spence SH, Donovan CL, March S, et al. Generic versus disorder specific cognitive behavior therapy for social anxiety disorder in youth: A randomized controlled trial using internet delivery. *Behav Res Ther* 2017;90:41-57. doi: 10.1016/j.brat.2016.12.003
31. Guy W. Clinical global impression scale. *The ECDEU Assessment Manual for Psychopharmacology-Revised Volume DHEW Publ No ADM 1976;76(338):218-22.*
32. Sheehan DV, Lecrubier Y, Sheehan KH, et al. The Mini-International Neuropsychiatric Interview (M.I.N.I.): the development and validation of a structured diagnostic psychiatric interview for DSM-IV and ICD-10. *J Clin Psychiatry* 1998;59 Suppl 20:22-33;quiz 34-57.
33. Albano A, Silverman W. The Anxiety Disorders Interview Schedule for Children for DSM-IV: clinician manual (child and parent versions). *San Antonio, TX: Psychological Corporation* 1996



- 1
- 2
- 3 34. Shaffer D, Gould MS, Brasic J, et al. A children's global assessment scale (CGAS). *Arch*
- 4 *Gen Psychiatry* 1983;40(11):1228-31.
- 5 35. Beidel DC, Turner SM, Morris TL. A new inventory to assess childhood social anxiety
- 6 and phobia - the social phobia and anxiety inventory for children *Psychol Assess*
- 7 1995;7(1):73-79. doi: 10.1037/1040-3590.7.1.73
- 8 36. Clark DM, Ehlers A, McManus F, et al. Cognitive therapy versus fluoxetine in
- 9 generalized social phobia: a randomized placebo-controlled trial. *J Consult Clin*
- 10 *Psychol* 2003;71(6):1058.
- 11 37. Hedman E, Mörtberg E, Hesser H, et al. Mediators in psychological treatment of social
- 12 anxiety disorder: Individual cognitive therapy compared to cognitive behavioral
- 13 group therapy. *Behav Res Ther* 2013;51(10):696-705.
- 14 38. Chorpita BF, Yim L, Moffitt C, et al. Assessment of symptoms of DSM-IV anxiety and
- 15 depression in children: a revised child anxiety and depression scale. *Behav Res*
- 16 *Ther* 2000;38(8):835-55.
- 17 39. Mundt JC, Marks IM, Shear MK, et al. The Work and Social Adjustment Scale: a simple
- 18 measure of impairment in functioning. *Br J Psychiatry* 2002;180:461-4.
- 19 40. Mataix-Cols D, Cowley AJ, Hankins M, et al. Reliability and validity of the Work and
- 20 Social Adjustment Scale in phobic disorders. *Compr Psychiatry* 2005;46(3):223-
- 21 28.
- 22 41. Ravens-Sieberer U, Gosch A, Rajmil L, et al. KIDSCREEN-52 quality-of-life measure
- 23 for children and adolescents. *Expert Rev Pharmacoecon Outcomes Res*
- 24 2005;5(3):353-64.
- 25 42. Bouwmans C, De Jong K, Timman R, et al. Feasibility, reliability and validity of a
- 26 questionnaire on healthcare consumption and productivity loss in patients with a
- 27 psychiatric disorder (TiC-P). *BMC Health Serv Res* 2013;13(1):1.
- 28 43. Venkatesh V, Morris MG, Davis GB, et al. User acceptance of information technology:
- 29 Toward a unified view. *MIS quarterly* 2003:425-78.
- 30 44. Bonnert M, Olen O, Lalouni M, et al. Internet-Delivered Cognitive Behavior Therapy
- 31 for Adolescents With Irritable Bowel Syndrome: A Randomized Controlled Trial.
- 32 *Am J Gastroenterol* 2016 doi: 10.1038/ajg.2016.503
- 33 45. Lenhard F, Vigerland S, Andersson E, et al. Internet-delivered cognitive behavior
- 34 therapy for adolescents with obsessive-compulsive disorder: an open trial. *PLoS*
- 35 *One* 2014;9(6):e100773.
- 36 46. Vigerland S, Thulin U, Ljotsson B, et al. Internet-delivered CBT for children with
- 37 specific phobia: a pilot study. *Cogn Behav Ther* 2013;42(4):303-14. doi:
- 38 10.1080/16506073.2013.844201
- 39 47. Rapee RM, Heimberg RG. A cognitive-behavioral model of anxiety in social phobia.
- 40 *Behav Res Ther* 1997;35(8):741-56.
- 41 48. Clark DM, Wells A. A cognitive model of social phobia. *Social phobia: Diagnosis,*
- 42 *assessment, and treatment* 1995;41(68):00022-3.
- 43 49. Albano AM, Marten PA, Holt CS, et al. Cognitive-Behavioral Group Treatment for
- 44 Social Phobia in Adolescents A Preliminary Study. *J Nerv Ment Dis*
- 45 1995;183(10):649-56.
- 46 50. Albano AM, DiBartolo PM. Cognitive-Behavioral Therapy for Social Phobia in
- 47 Adolescents: Stand Up, Speak Out Therapist Guide: Oxford University Press 2007.
- 48 51. Cohen J. A coefficient of agreement for nominal scales. *Educational and Psychosocial*
- 49 *Measurement*, 20, 37-46, 1960.
- 50 52. Mannuzza S, Fyer AJ, Martin LY, et al. Reliability of anxiety assessment. I. Diagnostic
- 51 agreement. *Arch Gen Psychiatry* 1989;46(12):1093-101.
- 52
- 53
- 54
- 55
- 56
- 57
- 58
- 59
- 60

- 1  
2  
3 53. Gueorguieva R, Krystal JH. Move over ANOVA: progress in analyzing repeated-  
4 measures data and its reflection in papers published in the Archives of General  
5 Psychiatry. *Arch Gen Psychiatry* 2004;61(3):310-7. doi:  
6 10.1001/archpsyc.61.3.310  
7  
8 54. Cohen J. A power primer. *Psychol Bull* 1992;112(1):155.  
9 55. Hayward C, Varady S, Albano AM, et al. Cognitive-behavioral group therapy for social  
10 phobia in female adolescents: results of a pilot study. *J Am Acad Child Adolesc*  
11 *Psychiatry* 2000;39(6):721-26.  
12 56. Spence SH, Donovan C, Brechman - Toussaint M. The treatment of childhood social  
13 phobia: The effectiveness of a social skills training - based, cognitive -  
14 behavioural intervention, with and without parental involvement. *J Child Psychol*  
15 *Psychiatry* 2000;41(6):713-26.  
16 57. Öst L-G, Cederlund R, Reuterskiöld L. Behavioral treatment of social phobia in youth:  
17 Does parent education training improve the outcome? *Behav Res Ther*  
18 2015;67:19-29.  
19  
20  
21  
22  
23  
24  
25  
26  
27  
28  
29  
30  
31  
32  
33  
34  
35  
36  
37  
38  
39  
40  
41  
42  
43  
44  
45  
46  
47  
48  
49  
50  
51  
52  
53  
54  
55  
56  
57  
58  
59  
60

Table 1. Demographic and clinical features of study participants (N = 30)

| Variables                                                                                                                        |                                           | N          | %    |
|----------------------------------------------------------------------------------------------------------------------------------|-------------------------------------------|------------|------|
| <b>Age (years)</b>                                                                                                               | <i>M (SD)</i>                             | 15 (1.22)  |      |
|                                                                                                                                  | min-max                                   | 13-17      |      |
| <b>Gender</b>                                                                                                                    | Girls                                     | 25         | 83   |
|                                                                                                                                  | Boys                                      | 5          | 17   |
| <b>Country of birth, adolescent</b>                                                                                              | Sweden                                    | 29         | 97   |
|                                                                                                                                  | Other                                     | 1          | 3    |
| <b>Country of birth, parents</b>                                                                                                 | Both in Sweden                            | 20         | 67   |
|                                                                                                                                  | One in Sweden                             | 7          | 23   |
|                                                                                                                                  | None in Sweden                            | 3          | 10   |
| <b>Education, responding parent</b>                                                                                              | Primary                                   | 14         | 47   |
|                                                                                                                                  | Higher                                    | 16         | 53   |
| <b>Employment, responding parent</b>                                                                                             | Working                                   | 25         | 83   |
|                                                                                                                                  | Unemployed                                | 4          | 13   |
|                                                                                                                                  | Retired                                   | 1          | 3    |
| <b>Psychotropic medication pre-treatment</b>                                                                                     | None                                      | 27         | 90   |
|                                                                                                                                  | SSRI                                      | 3          | 10   |
| <b>Prior psychological treatment</b>                                                                                             | None                                      | 11         | 37   |
|                                                                                                                                  | Primary care, counseling or equivalent    | 4          | 13   |
|                                                                                                                                  | Psychiatric specialist care or equivalent | 14         | 47   |
| <b>Referred from child health services</b>                                                                                       |                                           | 6          | 20   |
| <b>Comorbid diagnoses</b>                                                                                                        | Specific Phobia                           | 8          | 26.7 |
|                                                                                                                                  | GAD                                       | 5          | 16.7 |
|                                                                                                                                  | ADD                                       | 3          | 10   |
|                                                                                                                                  | Depression                                | 2          | 6.7  |
|                                                                                                                                  | OCD                                       | 2          | 6.7  |
|                                                                                                                                  | Panic disorder                            | 1          | 3.3  |
|                                                                                                                                  | Tics/Tourette                             | 1          | 3.3  |
|                                                                                                                                  | Separation anxiety                        | 1          | 3.3  |
|                                                                                                                                  | Trichotillomania                          | 1          | 3.3  |
| <b>Frequency of comorbid diagnoses</b>                                                                                           | None                                      | 13         | 43.3 |
|                                                                                                                                  | One                                       | 11         | 36.7 |
|                                                                                                                                  | Two                                       | 3          | 10   |
|                                                                                                                                  | Three or more                             | 3          | 10   |
| <b>Onset (age in years)</b>                                                                                                      | <i>M (SD)</i>                             | 8.9 (4.29) |      |
| <b>Duration of SAD (years)</b>                                                                                                   | <i>M (SD)</i>                             | 6.2 (4.05) |      |
| <b>Note: Primary education ≤12. Higher education &gt;12 years.</b>                                                               |                                           |            |      |
| <b>Abbreviations: GAD = generalized anxiety disorder; ADD = attention deficit disorder; OCD = obsessive compulsive disorder.</b> |                                           |            |      |

**Table 2. An overview of the content of the ICBT protocol and group-exposure sessions**

| Chapter | Adolescent                                                                                                                         | Parent                                                                                                                                             | Group-exposure sessions                                                                                                                                                                  |
|---------|------------------------------------------------------------------------------------------------------------------------------------|----------------------------------------------------------------------------------------------------------------------------------------------------|------------------------------------------------------------------------------------------------------------------------------------------------------------------------------------------|
| 1       | Introduction to ICBT, Learn about emotions, fear and social anxiety. How to do functional analyses of my own behavior              | Introduction to ICBT. Learn about emotions, fear and social anxiety. How to do functional analyses of my teenager's behavior and my own reactions. |                                                                                                                                                                                          |
| 2       | More about social anxiety disorder. Learn to reduce self-focus and safety behaviors. Improve coping strategies.                    | Suggest treatment goals. Plan the treatment. Learn about exposure and how to be a co-therapist during exposure.                                    |                                                                                                                                                                                          |
| 3       | Map the social anxiety. Learn about exposure to social situations. Set treatment goals and build an individual exposure hierarchy. | Learn about common parental challenges. How to reward my adolescent. Problem solving.                                                              |                                                                                                                                                                                          |
| 4       |                                                                                                                                    | How to handle negative thoughts. Learn about social skills.                                                                                        | Modelling and practice of social skills. Modelling and mapping of safety behaviors and how to reduce them. Set an individual exposure hierarchy. Exposure in vivo. Summary with parents. |
| 5       | Exposure follow-up. Learn about negative thoughts and how to handle them.                                                          | Prepare relapse prevention. Evaluation of parent modules and treatment.                                                                            |                                                                                                                                                                                          |
| 6       |                                                                                                                                    |                                                                                                                                                    | Repetition of treatment components. Exposure in vivo. Summary with parents.                                                                                                              |
| 7       | Exposure follow-up. Extended practice of focus shift.                                                                              |                                                                                                                                                    |                                                                                                                                                                                          |
| 8       | Exposure follow-up. Negative thoughts follow-up. Problem solving.                                                                  |                                                                                                                                                    |                                                                                                                                                                                          |
| 9       | Exposure follow-up. Learn how to say no and other self-assertive behaviors.                                                        |                                                                                                                                                    |                                                                                                                                                                                          |
| 10      |                                                                                                                                    |                                                                                                                                                    | Exposure in vivo. Social mishaps in public environment. Summary with parents.                                                                                                            |
| 11      | Exposure follow-up. Last sprint: how to get the most out of the last exposures.                                                    |                                                                                                                                                    |                                                                                                                                                                                          |
| 12      | Make a plan for relapse prevention. What did I learn? What do I want to practice further? Make an evaluation of the treatment.     |                                                                                                                                                    |                                                                                                                                                                                          |

Table 3 Means, standard deviations, pre- to post and post to 6-month follow-up comparisons, and effect sizes of all outcome measures

| Measure                                      | Pre  |       | Post |       | Pre to post comparison |                   | 6-month follow-up |       | Post to follow-up comparison |                    |
|----------------------------------------------|------|-------|------|-------|------------------------|-------------------|-------------------|-------|------------------------------|--------------------|
|                                              | M    | SD    | M    | SD    | p                      | d (95% CI)        | M                 | SD    | p                            | d (95%CI)          |
| <i>Clinician-rated</i>                       |      |       |      |       |                        |                   |                   |       |                              |                    |
| CGI-S                                        | 4.6  | 0.72  | 3.3  | 1.3   | <.001                  | 1.17 (0.61, 1.72) | 3.0               | 1.43  | .015                         | 0.22 (-0.01, 0.45) |
| C-GAS                                        | 55.5 | 6.68  | 62.0 | 8.85  | <.001                  | 0.80 (0.40, 1.21) | 65.4              | 11.14 | <.001                        | 0.30 (0.13, 0.46)  |
| <i>Self- and parent rated social anxiety</i> |      |       |      |       |                        |                   |                   |       |                              |                    |
| SPAI-C                                       | 33.4 | 9.32  | 24.5 | 11.31 | <.001                  | 0.85 (0.36, 1.34) | 21.5              | 11.24 | .023                         | 0.27 (0.02, 0.51)  |
| SPAI-P                                       | 35.3 | 8.46  | 27.2 | 11.55 | <.001                  | 0.79 (0.29, 1.28) | 25.7              | 11.01 | n.s.                         |                    |
| SPWSS avoid                                  | 4.0  | 2.38  | 1.9  | 2.22  | <.001                  | 0.91 (0.36, 1.47) | 1.8               | 1.81  | <.001                        | 0.05 (-0.4, 0.5)   |
| SPWSS s-f                                    | 4.9  | 1.74  | 2.8  | 1.44  | <.001                  | 1.31 (0.61, 2.02) | 3.3               | 2.03  | <.001                        | -0.28 (-0.83-0.26) |
| SPWSS a a                                    | 4.9  | 1.85  | 3.0  | 2.19  | <.001                  | 0.94 (0.32, 1.55) | 2.4               | 1.92  | <.001                        | 0.29 (-0.18-0.76)  |
| SPWSS pep                                    | 4.8  | 2.29  | 3.6  | 1.77  | <.001                  | 0.58 (0.02-1.15)  | 3.3               | 2.30  | <.001                        | 0.14 (-0.36-0.65)  |
| <i>Other self- and parent rated measures</i> |      |       |      |       |                        |                   |                   |       |                              |                    |
| <b>RCADS-C SAD</b>                           | 18.5 | 5.69  | 14.2 | 5.87  | <.001                  | 0.74 (0.36, 1.13) | 12.4              | 6.16  | .018                         | 0.30(0.05, 0.55)   |
| <b>RCADS-P SAD</b>                           | 16.4 | 5.88  | 13.2 | 5.70  | .006                   | 0.55 (0.09, 1.01) | 12.3              | 6.07  | n.s.                         |                    |
| <b>RCADS-C</b>                               | 60.0 | 24.77 | 42.1 | 21.74 | <.001                  | 0.76 (0.32, 1.21) | 38.4              | 25.92 | n.s.                         |                    |
| <b>RCADS-P</b>                               | 46.2 | 23.39 | 35.2 | 19.13 | .005                   | 0.51 (0.11, 0.91) | 31.8              | 22.31 | n.s.                         |                    |
| <b>KIDSCREEN-C</b>                           | 32.2 | 5.59  | 34.1 | 6.07  | .036                   | 0.32 (0.06, 0.59) | 35.7              | 6.93  | n.s.                         |                    |
| <b>KIDSCREEN-P</b>                           | 33.1 | 4.50  | 35.5 | 5.98  | .025                   | 0.44 (0.06, 0.82) | 35.8              | 5.85  | n.s.                         |                    |
| <b>EWSAS-C</b>                               | 15.0 | 7.47  | 10.9 | 6.69  | .006                   | 0.58 (0.14, 1.01) | 7.8               | 5.28  | .004                         | 0.50 (0.1, 0.91)   |
| <b>EWSAS-P</b>                               | 14.6 | 6.51  | 11.4 | 6.88  | .002                   | 0.48 (0.13, 0.83) | 9.1               | 7.44  | .002                         | 0.31 (0.1, 0.54)   |

Abbreviations: CGI-S = The Clinical Global Impression – Severity, C-GAS = Children’s Global Assessment Scale, SPAI-C/P = Social Phobia and Anxiety Inventory - Child and Parent Version, SPWSS = The Social Phobia Weekly Summary Scale, SPWSS avoid = avoidance, s-f = self-focus, a.a = anticipatory anxiety, pep = post event-processing, RCADS-C/P = The Revised Children Anxiety And Depression Scale – Child and Parent Version, RCADS-C/P SAD = The Revised Children Anxiety And Depression Scale – Child and Parent Version, SAD subscale, KIDSCREEN-C/P = The Health related quality of life questionnaire for children, adolescents and their parents, EWSAS-C/P = The Education, Work and Social Adjustment Scale – Child and Parent Version

1  
2  
3  
4  
5  
6  
7  
8  
9  
10  
11  
12  
13  
14  
15  
16  
17  
18  
19  
20  
21  
22  
23  
24  
25  
26  
27  
28  
29  
30  
31  
32  
33  
34  
35  
36  
37  
38  
39  
40  
41  
42  
43  
44  
45  
46  
47  
48  
49

For peer review only

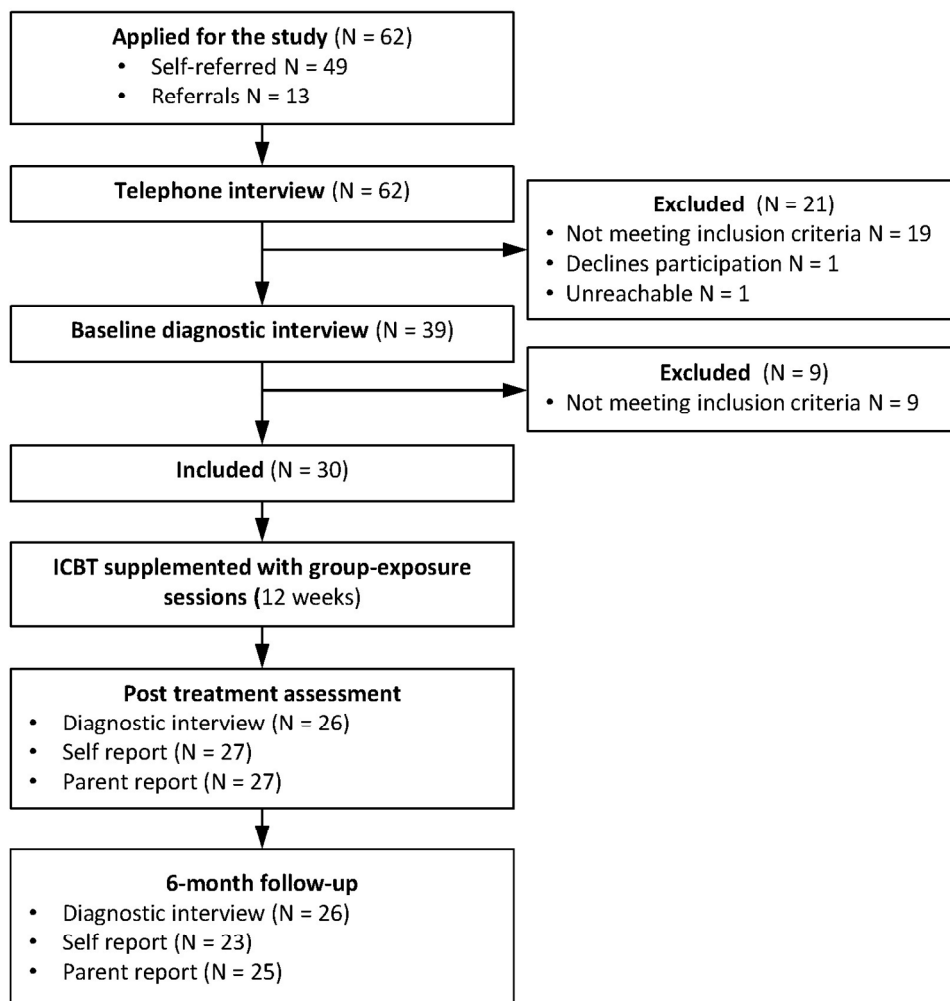

Figure 1. Study flow chart

143x149mm (300 x 300 DPI)

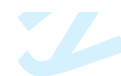

1  
2  
3  
4  
5  
6  
7  
8  
9  
10  
11  
12  
13  
14  
15  
16  
17  
18  
19  
20  
21  
22  
23  
24  
25  
26  
27  
28  
29  
30  
31  
32  
33  
34  
35  
36  
37  
38  
39  
40  
41  
42  
43  
44  
45  
46  
47  
48  
49  
50  
51  
52  
53  
54  
55  
56  
57  
58  
59  
60

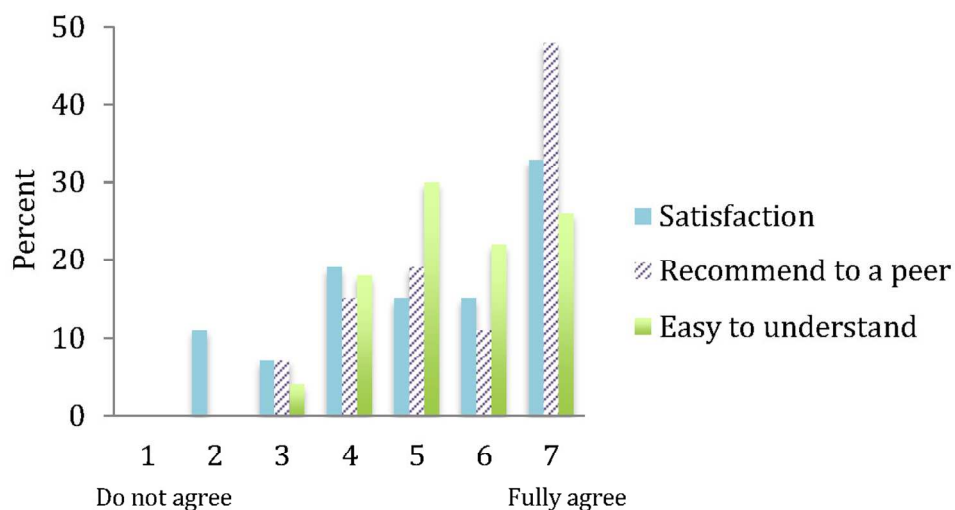

Figure 2. Adolescents' evaluation of BIP SOFT

112x64mm (300 x 300 DPI)

review only



| Section/topic and item No  | Standard checklist item                                                                                                 | Extension for pilot trials                                                                                                                          | Page No where item is reported |
|----------------------------|-------------------------------------------------------------------------------------------------------------------------|-----------------------------------------------------------------------------------------------------------------------------------------------------|--------------------------------|
| Title and abstract         |                                                                                                                         |                                                                                                                                                     |                                |
| 1a                         | Identification as a randomised trial in the title                                                                       | Identification as a pilot or feasibility randomised trial in the title                                                                              | 1                              |
| 1b                         | Structured summary of trial design, methods, results, and conclusions (for specific guidance see CONSORT for abstracts) | Structured summary of pilot trial design, methods, results, and conclusions (for specific guidance see CONSORT abstract extension for pilot trials) | 2-3                            |
| Introduction               |                                                                                                                         |                                                                                                                                                     |                                |
| Background and objectives: |                                                                                                                         |                                                                                                                                                     |                                |
| 2a                         | Scientific background and explanation of rationale                                                                      | Scientific background and explanation of rationale for future definitive trial, and reasons for randomised pilot trial                              | 3-5                            |
| 2b                         | Specific objectives or hypotheses                                                                                       | Specific objectives or research questions for pilot trial                                                                                           | 5                              |
| Methods                    |                                                                                                                         |                                                                                                                                                     |                                |
| Trial design:              |                                                                                                                         |                                                                                                                                                     |                                |

| Section/topic and item No | Standard checklist item                                                                                                               | Extension for pilot trials                                                                               | Page No where item is reported |
|---------------------------|---------------------------------------------------------------------------------------------------------------------------------------|----------------------------------------------------------------------------------------------------------|--------------------------------|
| 3a                        | Description of trial design (such as parallel, factorial) including allocation ratio                                                  | Description of pilot trial design (such as parallel, factorial) including allocation ratio               | 2                              |
| 3b                        | Important changes to methods after trial commencement (such as eligibility criteria), with reasons                                    | Important changes to methods after pilot trial commencement (such as eligibility criteria), with reasons | NA                             |
| Participants:             |                                                                                                                                       |                                                                                                          |                                |
| 4a                        | Eligibility criteria for participants                                                                                                 |                                                                                                          | 5-6                            |
| 4b                        | Settings and locations where the data were collected                                                                                  |                                                                                                          | 5                              |
| 4c                        |                                                                                                                                       | How participants were identified and consented                                                           | 6,9                            |
| Interventions:            |                                                                                                                                       |                                                                                                          |                                |
| 5                         | The interventions for each group with sufficient details to allow replication, including how and when they were actually administered |                                                                                                          | 10-11                          |
| Outcomes:                 |                                                                                                                                       |                                                                                                          |                                |

| Section/topic and item No | Standard checklist item                                                                                           | Extension for pilot trials                                                                                                                                   | Page No where item is reported |
|---------------------------|-------------------------------------------------------------------------------------------------------------------|--------------------------------------------------------------------------------------------------------------------------------------------------------------|--------------------------------|
| 6a                        | Completely defined prespecified primary and secondary outcome measures, including how and when they were assessed | Completely defined prespecified assessments or measurements to address each pilot trial objective specified in 2b, including how and when they were assessed | 6-9                            |
| 6b                        | Any changes to trial outcomes after the trial commenced, with reasons                                             | Any changes to pilot trial assessments or measurements after the pilot trial commenced, with reasons                                                         | NA                             |
| 6c                        |                                                                                                                   | If applicable, prespecified criteria used to judge whether, or how, to proceed with future definitive trial                                                  | NA                             |
| Sample size:              |                                                                                                                   |                                                                                                                                                              |                                |
| 7a                        | How sample size was determined                                                                                    | Rationale for numbers in the pilot trial                                                                                                                     | 6                              |
| 7b                        | When applicable, explanation of any interim analyses and stopping guidelines                                      |                                                                                                                                                              | NA                             |
| Randomisation:            |                                                                                                                   |                                                                                                                                                              |                                |

1  
2  
3  
4  
5  
6  
7  
8  
9  
10  
11  
12  
13  
14  
15  
16  
17  
18  
19  
20  
21  
22  
23  
24  
25  
26  
27  
28  
29  
30  
31  
32  
33  
34  
35  
36  
37  
38  
39  
40  
41  
42  
43  
44  
45  
46  
47  
48  
49

| Section/topic and item No         | Standard checklist item                                                                                                                                                                     | Extension for pilot trials                                                             | Page No where item is reported |
|-----------------------------------|---------------------------------------------------------------------------------------------------------------------------------------------------------------------------------------------|----------------------------------------------------------------------------------------|--------------------------------|
| Sequence generation:              |                                                                                                                                                                                             |                                                                                        |                                |
| 8a                                | Method used to generate the random allocation sequence                                                                                                                                      |                                                                                        | NA                             |
| 8b                                | Type of randomisation; details of any restriction (such as blocking and block size)                                                                                                         | Type of randomisation(s); details of any restriction (such as blocking and block size) | NA                             |
| Allocation concealment mechanism: |                                                                                                                                                                                             |                                                                                        |                                |
| 9                                 | Mechanism used to implement the random allocation sequence (such as sequentially numbered containers), describing any steps taken to conceal the sequence until interventions were assigned |                                                                                        | NA                             |
| Implementation:                   |                                                                                                                                                                                             |                                                                                        |                                |
| 10                                | Who generated the random allocation sequence, enrolled participants, and assigned participants to interventions                                                                             |                                                                                        | NA                             |
| Blinding:                         |                                                                                                                                                                                             |                                                                                        |                                |

| Section/topic and item No                             | Standard checklist item                                                                                                         | Extension for pilot trials                                                                                                   | Page No where item is reported |
|-------------------------------------------------------|---------------------------------------------------------------------------------------------------------------------------------|------------------------------------------------------------------------------------------------------------------------------|--------------------------------|
| 11a                                                   | If done, who was blinded after assignment to interventions (eg, participants, care providers, those assessing outcomes) and how |                                                                                                                              | NA                             |
| 11b                                                   | If relevant, description of the similarity of interventions                                                                     |                                                                                                                              | NA                             |
| Analytical methods:                                   |                                                                                                                                 |                                                                                                                              |                                |
| 12a                                                   | Statistical methods used to compare groups for primary and secondary outcomes                                                   | Methods used to address each pilot trial objective whether qualitative or quantitative                                       | 12                             |
| 12b                                                   | Methods for additional analyses, such as subgroup analyses and adjusted analyses                                                | Not applicable                                                                                                               | NA                             |
| Results                                               |                                                                                                                                 |                                                                                                                              |                                |
| Participant flow (a diagram is strongly recommended): |                                                                                                                                 |                                                                                                                              |                                |
| 13a                                                   | For each group, the numbers of participants who were randomly assigned, received intended treatment, and were analysed for the  | For each group, the numbers of participants who were approached and/or assessed for eligibility, randomly assigned, received | 10                             |

1  
2  
3  
4  
5  
6  
7  
8  
9  
10  
11  
12  
13  
14  
15  
16  
17  
18  
19  
20  
21  
22  
23  
24  
25  
26  
27  
28  
29  
30  
31  
32  
33  
34  
35  
36  
37  
38  
39  
40  
41  
42  
43  
44  
45  
46  
47  
48  
49

| Section/topic and item No | Standard checklist item                                                                        | Extension for pilot trials                                                                             | Page No where item is reported |
|---------------------------|------------------------------------------------------------------------------------------------|--------------------------------------------------------------------------------------------------------|--------------------------------|
|                           | primary outcome                                                                                | intended treatment, and were assessed for each objective                                               |                                |
| 13b                       | For each group, losses and exclusions after randomisation, together with reasons               |                                                                                                        | NA                             |
| Recruitment:              |                                                                                                |                                                                                                        |                                |
| 14a                       | Dates defining the periods of recruitment and follow-up                                        |                                                                                                        | 5                              |
| 14b                       | Why the trial ended or was stopped                                                             | Why the pilot trial ended or was stopped                                                               | NA                             |
| Baseline data:            |                                                                                                |                                                                                                        |                                |
| 15                        | A table showing baseline demographic and clinical characteristics for each group               |                                                                                                        | 6                              |
| Numbers analysed:         |                                                                                                |                                                                                                        |                                |
| 16                        | For each group, number of participants (denominator) included in each analysis and whether the | For each objective, number of participants (denominator) included in each analysis. If relevant, these | 12                             |

| Section/topic and item No | Standard checklist item                                                                                                                           | Extension for pilot trials                                                                                                                                                     | Page No where item is reported |
|---------------------------|---------------------------------------------------------------------------------------------------------------------------------------------------|--------------------------------------------------------------------------------------------------------------------------------------------------------------------------------|--------------------------------|
|                           | analysis was by original assigned groups                                                                                                          | numbers should be by randomised group                                                                                                                                          |                                |
| Outcomes and estimation:  |                                                                                                                                                   |                                                                                                                                                                                |                                |
| 17a                       | For each primary and secondary outcome, results for each group, and the estimated effect size and its precision (such as 95% confidence interval) | For each objective, results including expressions of uncertainty (such as 95% confidence interval) for any estimates. If relevant, these results should be by randomised group | 27                             |
| 17b                       | For binary outcomes, presentation of both absolute and relative effect sizes is recommended                                                       | Not applicable                                                                                                                                                                 | NA                             |
| Ancillary analyses:       |                                                                                                                                                   |                                                                                                                                                                                |                                |
| 18                        | Results of any other analyses performed, including subgroup analyses and adjusted analyses, distinguishing prespecified from exploratory          | Results of any other analyses performed that could be used to inform the future definitive trial                                                                               | 15                             |
| Harms:                    |                                                                                                                                                   |                                                                                                                                                                                |                                |
| 19                        | All important harms or unintended                                                                                                                 |                                                                                                                                                                                | 16                             |

1  
2  
3  
4  
5  
6  
7  
8  
9  
10  
11  
12  
13  
14  
15  
16  
17  
18  
19  
20  
21  
22  
23  
24  
25  
26  
27  
28  
29  
30  
31  
32  
33  
34  
35  
36  
37  
38  
39  
40  
41  
42  
43  
44  
45  
46  
47  
48  
49

| Section/topic and item No | Standard checklist item                                                                                          | Extension for pilot trials                                                                                        | Page No where item is reported |
|---------------------------|------------------------------------------------------------------------------------------------------------------|-------------------------------------------------------------------------------------------------------------------|--------------------------------|
|                           | effects in each group (for specific guidance see CONSORT for harms)                                              |                                                                                                                   |                                |
| 19a                       |                                                                                                                  | If relevant, other important unintended consequences                                                              | NA                             |
| Discussion                |                                                                                                                  |                                                                                                                   |                                |
| Limitations:              |                                                                                                                  |                                                                                                                   |                                |
| 20                        | Trial limitations, addressing sources of potential bias, imprecision, and, if relevant, multiplicity of analyses | Pilot trial limitations, addressing sources of potential bias and remaining uncertainty about feasibility         | 19                             |
| Generalisability:         |                                                                                                                  |                                                                                                                   |                                |
| 21                        | Generalisability (external validity, applicability) of the trial findings                                        | Generalisability (applicability) of pilot trial methods and findings to future definitive trial and other studies | 19                             |
| Interpretation:           |                                                                                                                  |                                                                                                                   |                                |
| 22                        | Interpretation consistent with results, balancing benefits and harms, and                                        | Interpretation consistent with pilot trial objectives and findings,                                               | 20                             |



| Section/topic and item No | Standard checklist item                                                         | Extension for pilot trials                                                                            | Page No where item is reported |
|---------------------------|---------------------------------------------------------------------------------|-------------------------------------------------------------------------------------------------------|--------------------------------|
|                           | considering other relevant evidence                                             | balancing potential benefits and harms, and considering other relevant evidence                       |                                |
| 22a                       |                                                                                 | Implications for progression from pilot to future definitive trial, including any proposed amendments | 18-19                          |
| Other information         |                                                                                 |                                                                                                       |                                |
| Registration:             |                                                                                 |                                                                                                       |                                |
| 23                        | Registration number and name of trial registry                                  | Registration number for pilot trial and name of trial registry                                        | 3                              |
| Protocol:                 |                                                                                 |                                                                                                       |                                |
| 24                        | Where the full trial protocol can be accessed, if available                     | Where the pilot trial protocol can be accessed, if available                                          | NA                             |
| Funding:                  |                                                                                 |                                                                                                       |                                |
| 25                        | Sources of funding and other support (such as supply of drugs), role of funders |                                                                                                       | 20                             |
| 26                        |                                                                                 | Ethical approval or approval by                                                                       | 5                              |

1  
2  
3  
4  
5  
6  
7  
8  
9  
10  
11  
12  
13  
14  
15  
16  
17  
18  
19  
20  
21  
22  
23  
24  
25  
26  
27  
28  
29  
30  
31  
32  
33  
34  
35  
36  
37  
38  
39  
40  
41  
42  
43  
44  
45  
46  
47  
48  
49

| Section/topic and item No | Standard checklist item | Extension for pilot trials                                 | Page No where item is reported |
|---------------------------|-------------------------|------------------------------------------------------------|--------------------------------|
|                           |                         | research review committee, confirmed with reference number |                                |

For peer review only

# BMJ Open

## Therapist-guided Internet-delivered cognitive behavioural therapy supplemented with group-exposure sessions for adolescents with social anxiety disorder: a feasibility trial

|                                 |                                                                                                                                                                                                                                                                                                                                                                                                                                                                                                                                                                                                                                                                                                                                                                                                                                                                                                                                                                                                                                                                                                                                                                                                                      |
|---------------------------------|----------------------------------------------------------------------------------------------------------------------------------------------------------------------------------------------------------------------------------------------------------------------------------------------------------------------------------------------------------------------------------------------------------------------------------------------------------------------------------------------------------------------------------------------------------------------------------------------------------------------------------------------------------------------------------------------------------------------------------------------------------------------------------------------------------------------------------------------------------------------------------------------------------------------------------------------------------------------------------------------------------------------------------------------------------------------------------------------------------------------------------------------------------------------------------------------------------------------|
| Journal:                        | <i>BMJ Open</i>                                                                                                                                                                                                                                                                                                                                                                                                                                                                                                                                                                                                                                                                                                                                                                                                                                                                                                                                                                                                                                                                                                                                                                                                      |
| Manuscript ID                   | bmjopen-2017-018345.R2                                                                                                                                                                                                                                                                                                                                                                                                                                                                                                                                                                                                                                                                                                                                                                                                                                                                                                                                                                                                                                                                                                                                                                                               |
| Article Type:                   | Research                                                                                                                                                                                                                                                                                                                                                                                                                                                                                                                                                                                                                                                                                                                                                                                                                                                                                                                                                                                                                                                                                                                                                                                                             |
| Date Submitted by the Author:   | 04-Oct-2017                                                                                                                                                                                                                                                                                                                                                                                                                                                                                                                                                                                                                                                                                                                                                                                                                                                                                                                                                                                                                                                                                                                                                                                                          |
| Complete List of Authors:       | <p>Nordh, Martina; Karolinska Institutet Department of Clinical Neuroscience, Center for Psychiatry Research; Stockholms Lans Landsting, Stockholm health care services</p> <p>Vigerland, Sarah; Karolinska Institutet Department of Clinical Neuroscience, Center for Psychiatry Research; Stockholms Lans Landsting, Stockholm health care services</p> <p>Öst, Lars-Göran; Stockholms Universitet, Department of psychology; Karolinska Institutet Department of Clinical Neuroscience</p> <p>Ljótsson, Brjánn; Karolinska Institutet Department of Clinical Neuroscience, Center for Psychiatry Research; Stockholms Lans Landsting, Stockholm health care services</p> <p>Mataix-Cols, David; Karolinska Institutet Department of Clinical Neuroscience, Center for Psychiatry Research; Stockholms Lans Landsting, Stockholm health care services</p> <p>Serlachius, Eva; Karolinska Institutet Department of Clinical Neuroscience, Center for Psychiatry Research; Stockholms Lans Landsting, Stockholm health care services</p> <p>Högström, Jens; Karolinska Institutet Department of Clinical Neuroscience, Center for Psychiatry Research; Stockholms Lans Landsting, Stockholm health care services</p> |
| <b>Primary Subject Heading</b>: | Mental health                                                                                                                                                                                                                                                                                                                                                                                                                                                                                                                                                                                                                                                                                                                                                                                                                                                                                                                                                                                                                                                                                                                                                                                                        |
| Secondary Subject Heading:      | Health services research                                                                                                                                                                                                                                                                                                                                                                                                                                                                                                                                                                                                                                                                                                                                                                                                                                                                                                                                                                                                                                                                                                                                                                                             |
| Keywords:                       | Child & adolescent psychiatry < PSYCHIATRY, Anxiety disorders < PSYCHIATRY, MENTAL HEALTH                                                                                                                                                                                                                                                                                                                                                                                                                                                                                                                                                                                                                                                                                                                                                                                                                                                                                                                                                                                                                                                                                                                            |
|                                 |                                                                                                                                                                                                                                                                                                                                                                                                                                                                                                                                                                                                                                                                                                                                                                                                                                                                                                                                                                                                                                                                                                                                                                                                                      |

SCHOLARONE™  
Manuscripts

**Word count**

Abstract: 273

Main text: 4820

Tables: 3 Figures: 2

## Therapist-guided Internet-delivered cognitive behavioural therapy supplemented with group-exposure sessions for adolescents with social anxiety disorder: a feasibility trial

Martina Nordh<sup>1,2</sup>, Sarah Vigerland<sup>1,2</sup>, Lars-Göran Öst<sup>3,4</sup>, Brjánn Ljótsson<sup>1,4</sup>, David Mataix-Cols<sup>1,2</sup>, Eva Serlachius<sup>1,2</sup>, Jens Högström<sup>1,2</sup>

**Author affiliations:**

<sup>1</sup>Centre for Psychiatry Research, Department of Clinical Neuroscience, Karolinska Institutet, Stockholm, Sweden

<sup>2</sup>Stockholm Health Care Services, Stockholm County Council, Stockholm, Sweden

<sup>3</sup>Department of psychology, Stockholm University, Stockholm, Sweden

<sup>4</sup>Department of Clinical Neuroscience, Division of psychology, Karolinska Institutet, Stockholm, Sweden

**Correspondance to:**

Martina Nordh

E-mail: [martina.nord@ki.se](mailto:martina.nord@ki.se)**Address:**

Child and Adolescent Psychiatry Research Center  
Gävlegatan 22  
113 30 Stockholm  
Sweden

Phone: +46 08 514 522 15

**ABSTRACT**

**Objectives:** Social anxiety disorder (SAD) is one of the most common psychiatric disorders in youth, with a prevalence of about 3-4%, and increased risk of adverse long-term outcomes, such as depression. Cognitive behavioural therapy (CBT) is considered the first-line treatment for youth with SAD but many adolescents remain untreated due to limited accessibility to CBT. The aim of this study was to develop and evaluate the feasibility and preliminary efficacy of a therapist-guided Internet-delivered CBT treatment, supplemented with clinic-based group-exposure sessions (BIP SOFT).

**Design:** A proof-of-concept, open clinical trial with 6-month follow-up.

**Participants:** The trial was conducted at a child and adolescent psychiatric research clinic and participants ( $N = 30$ ) were 13-17 years old (83% girls) with a principal diagnosis of SAD.

**Intervention:** 12 weeks of intervention, consisting of nine remote therapist-guided Internet-delivered CBT sessions and three group-exposure sessions at the clinic for the adolescents and five internet-delivered sessions for the parents.

**Results:** Adolescents were generally satisfied with the treatment and the completion-rate of Internet-modules, as well as attendance at group-sessions, was high. Post-treatment assessment showed a significant decrease in clinician-, adolescent-, and parent-rated social anxiety ( $d = 1.17, 0.85, \text{ and } 0.79$ , respectively), as well as in general self- and parent-rated anxiety and depression ( $d = 0.76 \text{ and } 0.51$ ), compared with pre-treatment levels. Furthermore, 47% of participants no longer met DSM-5 criteria for SAD at post-treatment. At a 6-month follow-up, symptom reductions were maintained, or further improved, and 57% of participants no longer met criteria for SAD.

1  
2  
3 **Conclusion:** Therapist- and parent guided Internet-delivered CBT, supplemented  
4  
5 with a limited number of group-exposure sessions is a feasible and promising  
6  
7 intervention for adolescents with SAD.  
8

9  
10 **Trial registration number:** Clinicaltrials.gov registration ID NCT02576171  
11

#### 12 13 14 Strengths and limitations of this study

- 15     ▪ This is the first study to investigate the feasibility and efficacy of a  
16       combined Internet-CBT and group-exposure treatment for youth with  
17       social anxiety disorder.
- 18     ▪ Participants were followed up six months after the end of treatment.
- 19     ▪ The study was uncontrolled which limits any causal inference about  
20       observed changes.  
21  
22  
23  
24  
25  
26  
27  
28  
29  
30  
31

#### 32 INTRODUCTION

33  
34 Social anxiety disorder (SAD) is characterized by an intense fear of being scrutinized and  
35  
36 negatively evaluated in social or performance situations<sup>1</sup>. The socially anxious  
37  
38 individual is typically afraid of making mistakes, being embarrassed in front of others  
39  
40 and of showing signs of anxiety, such as blushing or trembling, and may therefore avoid  
41  
42 social and performance situations or endure them under intense distress. The disorder  
43  
44 has a median age of onset of 9.2 years <sup>2</sup> and is one of the most common mental disorders  
45  
46 among adolescents. SAD is more common in adolescent girls than in adolescent boys  
47  
48 with a female to male odds ratio of 1.58 (95%CI: 1.18-2.12)<sup>2</sup>. The 12-month prevalence  
49  
50 is 3.4% <sup>3</sup> and 8.6% of the adolescent population fulfill diagnostic criteria at some point  
51  
52 between the age of 13 and 18<sup>2</sup>. If the disorder is left untreated it tends to follow a  
53  
54 chronic course<sup>2</sup> and can lead to severe secondary consequences such as depression<sup>4</sup> and  
55  
56  
57  
58  
59  
60

1  
2  
3 suicidality<sup>5</sup>, substance and alcohol dependence<sup>6</sup>, academic underperformance and  
4  
5 increased social isolation<sup>7</sup>. Consequently, SAD causes substantial impairment as well as  
6  
7 burden on patients' families and long-term societal costs<sup>8 9</sup>.

8  
9  
10 Cognitive behavioural therapy (CBT) for SAD is effective for adults<sup>10</sup> as well as for  
11  
12 children and adolescents<sup>11 12</sup> and is the first-line treatment according to international  
13  
14 clinical guidelines (e.g., the National Institute for Health and Care Excellence; NICE)<sup>13</sup>. In  
15  
16 face-to-face treatment, generic CBT has shown poorer outcomes for youth with SAD  
17  
18 compared to other anxiety disorders<sup>14</sup>, but when treatments have been tailored to  
19  
20 include SAD-specific components, such as social skills training, the reported effects have  
21  
22 been larger<sup>15 16</sup>.

23  
24  
25 Despite the high level of impairment caused by the disorder, only a small proportion  
26  
27 of adolescents with social anxiety seek help for their problems<sup>17 18</sup> and even fewer  
28  
29 receive effective treatment<sup>19</sup>. Barriers to receiving evidence-based psychological  
30  
31 treatment include limited availability of trained therapists, and practical issues such as  
32  
33 long travel distances to clinics, and the requirement to take time off school or work to  
34  
35 visit a clinic.  
36  
37

38  
39 Internet-delivered CBT (ICBT) has been suggested as a possible solution to some of  
40  
41 these barriers. It can provide the same treatment components as traditional CBT and  
42  
43 allow patients to work from home (or wherever suitable), guided by an online-therapist,  
44  
45 e.g. through e-mail or similar online communication. Treatment becomes more  
46  
47 accessible as the therapist and patient can communicate asynchronously and it may  
48  
49 increase treatment capacity, as therapist time per patient tends to be lower compared  
50  
51 with face-to-face CBT<sup>20-22</sup>. For adults with SAD, ICBT is an evidence-based treatment<sup>23</sup>  
52  
53 with at least one trial showing that ICBT is non-inferior to face-to-face CBT<sup>24</sup>. For youth,  
54  
55 ICBT is effective for mixed anxiety disorders when compared to a waitlist control<sup>25-28</sup>,  
56  
57  
58  
59  
60

1  
2  
3 with similar effects as face-to-face CBT <sup>29</sup>, suggesting that ICBT could be a suitable  
4  
5 treatment for adolescents with SAD. However, a recent study showed that only 12.8%  
6  
7 and 14.6% (in the SAD specific and generic ICBT conditions, respectively) of participants  
8  
9 were free from their SAD diagnosis at post-treatment assessment, indicating that using  
10  
11 the Internet, as the only modality to deliver CBT might not be sufficient<sup>30</sup>. Earlier  
12  
13 findings suggest that face-to-face CBT supported by computerized CBT may be more  
14  
15 effective than stand-alone ICBT for adolescents and young adults with anxiety  
16  
17 disorders<sup>31 32</sup>. Furthermore, it has been suggested that ICBT combined with face-to-face  
18  
19 CBT may be beneficial for adult patients with SAD<sup>33</sup> and depression<sup>34</sup>. Such a treatment  
20  
21 has, however, never been developed for adolescents with SAD before and the objective  
22  
23 of the current trial is to evaluate the feasibility and efficacy of ICBT supplemented with  
24  
25 clinic-based group-exposure sessions for adolescents with SAD. This treatment could  
26  
27 potentially draw on advantages from both formats, where ICBT is a cost-effective and  
28  
29 accessible format and group-sessions may ensure that key treatment components, such  
30  
31 as exposure to social situations and social skills training, are conveyed properly. Main  
32  
33 research questions are: Is the treatment (BIP SOFT) feasible and acceptable with regard  
34  
35 to adolescents' and parents' willingness to work with the Internet-modules, adolescents'  
36  
37 attendance rates at group sessions and treatment satisfaction? Does the treatment  
38  
39 reduce social anxiety symptoms and increase adolescents' level of functioning and  
40  
41 quality of life?  
42  
43  
44  
45  
46  
47  
48  
49

## 50 **METHOD**

51  
52 The study was conducted at a research unit within the Child and Adolescent Mental  
53  
54 Health Services in Stockholm, Sweden, and was approved by the Regional Ethical Review  
55  
56  
57  
58  
59  
60



1  
2  
3 Board in Stockholm, Sweden (2015/1383-31/2). Participants were recruited and  
4  
5 treated between October 2015 and May 2016.  
6

## 7 8 **Participants**

9  
10 Participants were 30 adolescents, 13-17 years old, with a principal diagnosis of SAD, and  
11  
12 their parents. Table 1 gives detailed information on demographic and clinical  
13  
14 characteristics of the sample. Inclusion criteria were: a) age 13-17 years, b) principal  
15  
16 DSM-5 diagnosis of SAD, c) ability to read and write Swedish, d) access to a computer  
17  
18 with Internet access and e) at least one parent being able to participate in the treatment.  
19  
20 Exclusion criteria were: f) initiation or dose modification of psychotropic drug within  
21  
22 the past six weeks, g)  $\geq 5$  sessions of CBT (including exposure) within the last six  
23  
24 months, h) any ongoing psychological treatment for SAD, i) diagnosed with an autism  
25  
26 spectrum disorder, current psychosis, eating disorder, severe depression, suicidal  
27  
28 behaviour or other current severe psychiatric condition j) current substance- or alcohol  
29  
30 abuse. Most participants that were excluded at the initial screening fulfilled an exclusion  
31  
32 criterion, due to having either initiated SSRI medication (or modified the dose) recently,  
33  
34 for having received CBT within the last six months or for being diagnosed with an  
35  
36 autism spectrum disorder. Adolescents excluded due to other severe psychiatric  
37  
38 conditions, such as severe depression or suicidality, were referred to more suitable  
39  
40 treatments.  
41  
42  
43  
44

45  
46 Participants were mainly recruited through advertisement in a local paper. The  
47  
48 advertisement included a website address ([www.bup.se/bip](http://www.bup.se/bip)) where interested families  
49  
50 could get study information and sign up. Clinicians working in the child- and adolescent  
51  
52 health services could also refer patients to the trial.  
53  
54  
55  
56  
57  
58  
59  
60

1  
2  
3 To achieve sufficient power and to be able to detect a within-group effect size of  $d =$   
4  
5 0.60 from pre to post with a power of 0.85 and  $\alpha = 0.05$ , allowing for a 10% drop out, we  
6  
7 included 30 participants in the study.  
8  
9

10 -----  
11  
12 Insert Table 1 here  
13  
14 -----  
15

## 16 **Measures**

### 17 *Primary outcome measures*

18  
19 The Clinical Global Impression – Severity (CGI-S)<sup>35</sup> is a clinician rating of symptom  
20  
21 severity, ranging from 1 (“normal, not mentally ill”) to 7 (“extremely ill”). The CGI-S  
22  
23 was administered at baseline by the treating therapist. At post-treatment and the 6-  
24  
25 month follow-up, another clinician than the one being responsible for the treatment  
26  
27 administered the CGIS-S.  
28  
29  
30  
31  
32

### 33 *Secondary outcome measures*

34  
35 Mini International Neuropsychiatric Interview for Children and Adolescents (M.I.N.I.  
36  
37 KID)<sup>36</sup>, was used to determine presence of SAD, as well as comorbid conditions. In  
38  
39 addition, the SAD section of the Anxiety Disorders Interview Schedule for DSM-IV-Child  
40  
41 Version (ADIS-C)<sup>37</sup> was used to further confirm SAD-diagnosis and to assess the  
42  
43 intensity of SAD symptoms. An independent rater (a clinical psychologist, not part of the  
44  
45 research group, blind to whether the adolescent had been included in the study or not)  
46  
47 watched recordings of the baseline interviews and reassessed 20% of them (both  
48  
49 included and excluded adolescents), generating an excellent inter-rater reliability at pre-  
50  
51 treatment for SAD-diagnosis ( $\kappa = 1.0$ ) and a fair inter-rater reliability for comorbidity ( $\kappa$   
52  
53 = 0.46,  $p < .05$ ).  
54  
55  
56  
57  
58  
59  
60

1  
2  
3 Clinical global impression – Improvement (CGI-I)<sup>35</sup> is a clinician rating of the  
4 participant’s change in symptom severity relative to baseline, ranging from 1 (“very  
5 much improved”) to 7 (“very much worse”). The Children’s Global Assessment Scale  
6 (CGAS)<sup>38</sup> is a clinician rating of global functioning (scale 0-100), with higher rating  
7 indicating higher level of functioning. The M.I.N.I. KID and CGAS were administered at  
8 baseline, post-treatment and at the 6-month follow-up, whereas the CGI-I was  
9 administered post-treatment and at the 6-month follow-up.  
10  
11  
12  
13  
14  
15  
16  
17  
18

19 Social Phobia and Anxiety Inventory - Child and Parent Version (SPAI-C/P)<sup>39</sup> is a 26-  
20 item self-report measure evaluating aspects of SAD on a 3-point scale, where a score of  
21  $\geq 18$  is considered the clinical level of social anxiety. The Social Phobia Weekly Summary  
22 Scale (SPWSS) is a five-item self-report scale<sup>40 41</sup> measuring dimensions of SAD (social  
23 anxiety, avoidance, self-focused attention, anticipatory processing and post-event  
24 processing). The SPAI-C/P and the SPWSS were administered at baseline, every third  
25 week during treatment, post-treatment as well as at the 6-month follow-up.  
26  
27  
28  
29  
30  
31  
32  
33  
34

35 The Revised Children Anxiety And Depression Scale – Child and Parent Version  
36 (RCADS-C/P)<sup>42</sup> is a 47-item self-report measure evaluating anxiety disorders (including  
37 one subscale for SAD) and depression on a 4-point scale, ranging from *never* to *always*.  
38 In the current trial one item regarding suicidality, with three options (“I do not think  
39 about killing myself”, “I think about killing myself, but would never do it” or “I want to  
40 kill myself”), was added at the end of the RCADS-C/P. The Education, Work and Social  
41 Adjustment Scale – Child and Parent Version (EWSAS-C/P)<sup>43 44</sup> is a 5-item self-report  
42 scale measuring functional impairment on a 9-point scale (higher rating indicating more  
43 impairment). The RCADS-C/P and the EWSAS-C/P were administered at baseline, after  
44 six weeks of treatment, post-treatment as well as at the 6-month follow-up.  
45  
46  
47  
48  
49  
50  
51  
52  
53  
54  
55  
56  
57  
58  
59  
60

1  
2  
3 The Health related quality of life questionnaire for children, adolescents and their  
4 parents (KIDSCREEN-10)<sup>45</sup> is a self-report measure assessing health related quality of  
5 life. The parent-rated measure Trimbos/iMTA questionnaire for Costs associated with  
6 Psychiatric Illness – Child version (TiC-P)<sup>46</sup> covers e.g. production loss among parents  
7 due to health problems in the child. The KIDSCREEN-10 and the TiC-P were  
8 administered at baseline, post-treatment and at the 6-month follow-up.  
9  
10  
11  
12  
13  
14  
15  
16  
17  
18

19 *Feasibility measures, adverse events and therapist time*

20 The Technology Acceptance Scale – child and parent version (TAS-C/P) is a self-report  
21 measure adapted from Venkatesh et al. <sup>47</sup>, which measures the usefulness, acceptability  
22 and satisfaction of the website through which the Internet-modules of the treatment  
23 were delivered. The TAS-C/P was administered after three weeks of treatment and post-  
24 treatment.  
25  
26  
27  
28  
29  
30  
31

32 At post-treatment, adolescents and parents were asked to report any negative  
33 experiences or adverse events over the course of treatment as well as to what extent the  
34 negative event had affected the adolescent's wellbeing.  
35  
36  
37  
38

39 Amount of therapist time per participant was logged automatically through the  
40 Internet-treatment platform.  
41  
42  
43  
44  
45

46 **Procedure**

47 Figure 1 gives an overview of inclusion procedures and assessment points. Families who  
48 applied to the study were contacted by telephone and a short screening interview was  
49 conducted. Eligible families were invited to diagnostic assessment at the clinic. After  
50 thorough information about the study, adolescents gave verbal assent to participate and  
51 written informed consent was obtained from parents. The screening interview M.I.N.I.  
52  
53  
54  
55  
56  
57  
58  
59  
60

1  
2  
3 KID (with the supplement of the SAD section of the ADIS-C) was then conducted. The  
4  
5 therapist who conducted the baseline assessment was responsible for the treatment of  
6  
7 the participant.  
8

9  
10 Adolescents with a principal diagnosis of SAD were included and adolescents and  
11  
12 parents completed baseline self-report measures online through the treatment platform.  
13  
14 In each family, one of the parents was assigned the main responsibility to respond to the  
15  
16 parent-report measures at each assessment point throughout the study. Adolescents and  
17  
18 parents had separate user accounts and a two-factor authentication (an individual  
19  
20 password and a single-use code sent to the user's cellular phone) gave access to the  
21  
22 online platform.  
23

24  
25 Self- and parent rated measures administered during the treatment (SPAI C/P,  
26  
27 SPWSS, RCADS C/P and EWSAS C/P) were completed online.  
28

29  
30 At post-treatment and at the 6-month follow-up all participating adolescents and  
31  
32 parents were invited back to the clinic for a diagnostic assessment. To reduce the risk of  
33  
34 biased assessment, a clinician that had not been responsible for the participant's  
35  
36 treatment conducted the post-treatment and follow-up assessments. All self-assessment  
37  
38 scales were administered online post-treatment and at follow-up. Families who could  
39  
40 not come to the clinic for post-treatment assessment (n = 1) and 6-month follow-up (n =  
41  
42 3) were assessed over the telephone.  
43  
44

45  
46 -----  
47  
48 Insert Figure 1 here  
49  
50 -----  
51

## 52 **Intervention**

53  
54 The intervention was 12 weeks of ICBT supplemented with group-exposure, comprising  
55  
56 nine Internet-delivered modules completed individually from home, and three group-  
57  
58  
59  
60

1  
2  
3 exposure sessions at the clinic (Table 2). The online treatment platform used in this  
4  
5 study was developed for delivery of ICBT and has been tested in a number of previous  
6  
7 studies for different psychiatric disorders in youth<sup>22 28 48-50</sup>. The current treatment (BIP  
8  
9 SOFT) was based on the cognitive-behavioural model by Rapee and Heimberg<sup>51</sup> and to  
10  
11 some extent on the cognitive model by Clark and Wells<sup>52</sup>. The treatment manual was  
12  
13 developed by the authors and contains CBT components commonly used for SAD in  
14  
15 youth<sup>15 53 54</sup>, such as exposure, coping strategies and social skills training. The group  
16  
17 sessions were mostly based on the Albano and DiBartolo group-CBT manual for  
18  
19 adolescent SAD<sup>54</sup>. Therapists in the study were three clinical psychologists and two  
20  
21 master students at their final year of training in clinical psychology.  
22  
23

24  
25 The Internet-modules included educative texts, animations, audio clips and exercises.  
26  
27 The parental part of the intervention consisted of five Internet-modules with parent-  
28  
29 specific topics such as “parental traps” (e.g., compensating for the adolescent in social  
30  
31 situations by for instance speaking for him/her) and doing functional analyses of such  
32  
33 parental accommodation (Table 2). Parents were encouraged to be actively involved in  
34  
35 their adolescent’s treatment and discuss with the adolescent how they should support  
36  
37 him or her throughout the treatment, e.g. during exposure exercises. Parents were also  
38  
39 encouraged to bring up parent-specific topics with their therapist, for example how to  
40  
41 support the adolescent before or during exposures. Parents could send messages to the  
42  
43 therapist throughout the 12 weeks of treatment with the purpose to keep parents active  
44  
45 as co-therapists. Therapists were instructed to only give support on actual treatment  
46  
47 content and to only answer messages about the adolescents (or about parents’  
48  
49 relationship with the adolescents) and not regarding parents’ own difficulties.  
50  
51

52  
53 Adolescents and parents were instructed to log in and complete one module each week.  
54  
55 The modules were assigned in a predetermined order and therefore, all modules but the  
56  
57  
58  
59  
60

1  
2  
3 first were initially locked. Once the participant completed a module, the therapist made  
4  
5 the next one available.  
6

7  
8 The therapists had asynchronous contact online with adolescents and parents every  
9  
10 week, commenting on their progress on work sheets and through a built in message  
11  
12 function. Therapists were instructed to log in and provide feedback to their families  
13  
14 three times per week. If necessary, therapists had telephone contact with families, e.g., if  
15  
16 they hadn't logged in during the last week or if mid-treatment self-reports exceeded a  
17  
18 cut-off for depression (>11 on RCADS-C depression subscale) or suicidality.  
19

20  
21 The group-exposure sessions (at week 4, 6 and 10) ensured that key components of  
22  
23 the treatment were demonstrated in a correct way and that participants could practice  
24  
25 e.g. exposure under observation of a therapist. To ensure large enough group sizes,  
26  
27 cohorts of six participants started the treatment at the same time. The group sessions  
28  
29 were two hours long and led by two of the clinical psychologists.  
30

31  
32 -----  
33  
34 Insert Table 2 here  
35  
36 -----  
37

### 38 39 **Statistical analysis**

40  
41 All analyses were conducted in SPSS Version 23.  
42

43  
44 Cohen's kappa coefficient ( $\kappa$ )<sup>55</sup> was used to calculate inter-rater reliability for SAD-  
45  
46 diagnosis and comorbidity at pre-treatment assessment. The level of reliability is  
47  
48 interpreted as poor when  $\kappa < 0.40$ , fair when  $\kappa$  is 0.40-0.59, good when  $\kappa$  is 0.60-0.74 and  
49  
50 excellent when  $\kappa > 0.74$ <sup>56</sup>.  
51

52  
53 Linear mixed models were used to analyse changes from pre- to post-treatment, and  
54  
55 from post-treatment to 6-month follow-up. Mixed model analyses use all available data  
56  
57 and account for correlations between measurements within the same subject<sup>57</sup>. Thus,  
58  
59  
60

1  
2  
3 missing data is handled within the model. All mixed models in this study included a fixed  
4  
5 effect for time (pre, post and 6-month follow-up) and a random effect for individual  
6  
7 subjects. Potential missing bias was investigated using *t*-tests that compared the  
8  
9 baseline characteristics of those who had complete data at post-treatment with those  
10  
11 who had missing data. For SPAI C/P and SPWSS three mid-treatment (week 3, 6 and 9)  
12  
13 time points were included in the analyses, and for RCADS C/P and EWSAS C/P one mid-  
14  
15 treatment (week 6) time point was included in the analyses.  
16  
17

18  
19 Effect sizes are reported as Cohen's  $d = (M_1 - M_2 / SD_{\text{pooled}})$ . Effect sizes are defined  
20  
21 according to Cohen's suggested levels, small ( $d \geq 0.20$ ), moderate ( $d \geq 0.50$ ) and large ( $d$   
22  
23  $\geq 0.80$ )<sup>58</sup>.  
24

## 25 RESULTS

### 26 Response rate and feasibility

27  
28 Mid-treatment measures were completed by 97% of the participating families at week  
29  
30 three, 83% at week six and 70% at week nine. Post-treatment and 6-month follow-up  
31  
32 measures were completed by 90% and 83% of the participating families, respectively. T-  
33  
34 tests comparing participants with missing versus complete data points on baseline  
35  
36 characteristics revealed no statistically significant differences.  
37  
38

39  
40 Adolescents completed on average 5.7 ( $sd = 2.1$ ) of the nine Internet-modules and  
41  
42 parents completed on average 4.4 ( $sd = 1.0$ ) of their five modules. The frequency of  
43  
44 completed modules by the adolescents was distributed as follows: 20% ( $n = 6$ )  
45  
46 completed 2-3 modules, 43% ( $n = 13$ ) completed 4-6 modules and 37% ( $n = 11$ )  
47  
48 completed 7-9 modules. None completed fewer than two modules.  
49  
50

51  
52 Attendance at the group-sessions were 70% (session 1), 77% (session 2) and 63%  
53  
54 (session 3) respectively. Two thirds of the participants attended two or more group  
55  
56 sessions and only 10% attended none.  
57  
58  
59  
60



1  
2  
3 None of the adolescents meeting inclusion criteria at baseline assessment declined  
4 participation, which indicates good acceptability of the offered treatment.  
5  
6

7 Figure 2 illustrates that a majority of the adolescents were satisfied with the  
8 treatment, would recommend the treatment to a friend and found the program easy to  
9 understand. Furthermore, most of the participating adolescents found the treatment's  
10 online platform easy to use, with a mean rating of 5.6 (range 4-7) on the 7-point TAS  
11 scale item (were 7 indicates full agreement with the statement "The program was easy  
12 to use").  
13  
14  
15  
16  
17  
18  
19  
20

21 -----  
22  
23 Insert Figure 2 here  
24  
25 -----  
26

### 27 **Clinician support**

28  
29 The average time a clinician spent giving feedback and guidance to participants  
30 (including time spent on the adolescent *and* parent) was 19.5 minutes per week for the  
31 Internet-modules. Group sessions required two hours of therapist time per participant  
32 in total during the 12 weeks, which corresponds to 10 minutes per week and  
33 participant. In total thus, each family got 29.5 minutes of therapist time, per week.  
34  
35  
36  
37  
38  
39  
40  
41  
42

### 43 **Changes in clinical outcomes from pre- to post-treatment**

44  
45 Means, standard deviations and effect sizes for pre to post changes, are presented in  
46 Table 3. Intention-to-treat analyses of the primary outcome measure (CGI-S) showed a  
47 significant decrease of SAD severity from pre- to post-treatment,  $t(26.05) = 5.62, p < .001$ ,  
48 with a large effect size,  $d = 1.17$  (95%CI 0.61,1.72). For all secondary outcome measures,  
49 analyses revealed significant improvements with moderate to large effect sizes, with the  
50 exception of quality of life (KIDSCREEN-C/P) where a small effect was observed. At post-  
51  
52  
53  
54  
55  
56  
57  
58  
59  
60

1  
2  
3 treatment, 47% of the participants ( $n = 14$ ) no longer met diagnostic criteria for SAD,  
4  
5 according to DSM-5 criteria and a CGI-rating  $<4$  (level of severity and functional  
6  
7 impairment below diagnostic threshold) and 30% ( $n = 9$ ) scored  $\leq 18$  on SPAI-C (cut-off  
8  
9 for clinical level of social anxiety). On the clinician rated CGI-I 8% ( $n=2$ ) were “very  
10  
11 much improved”, 23% ( $n = 6$ ) “much improved”, 42% ( $n = 11$ ) “minimally improved”,  
12  
13 23% ( $n = 6$ ) “not changed” and 4% ( $n = 1$ ) “minimally worse”.  
14  
15  
16  
17  
18

### 19 **Changes in clinical outcomes from post-treatment to 6-month follow-up**

20  
21 Table 3 gives an overview of means, standard deviations and effect sizes from post-  
22  
23 treatment to the 6-month follow-up. The improvements seen at post-treatment were  
24  
25 generally maintained and further augmented at the 6-month follow-up with small effect  
26  
27 sizes, except for self-focus (SPWSS) that deteriorated slightly. The primary outcome  
28  
29 measure (CGI-S) showed a significant decrease of SAD severity from post-treatment to  
30  
31 6-month follow up,  $t(25.45) = 2.60, p < .05$ , with a small effect size,  $d = 0.22$  (95%CI -0.01,  
32  
33 0.45). At follow-up, 57% ( $n = 17$ ) no longer met diagnostic criteria for SAD and 37% ( $n =$   
34  
35 11) scored  $\leq 18$  on SPAI-C.  
36  
37

38  
39 Comparison of pre-treatment and 6-month follow-up levels of social anxiety showed  
40  
41 overall improvements with large effect-sizes, CGI-S:  $t(27.23) = 6.24, p < .001, d = 1.36$   
42  
43 (95%CI 0.71, 2.01), SPAI-C:  $t(27.63) = 5.50, p < .001, d = 0.95$  (95%CI 0.51, 1.39) and  
44  
45 SPAI-P:  $t(26.08) = 5.57, p < .001, d = 1.14$  (95%CI 0.57, 1.72). Clinician-rated CGI-I  
46  
47 indicated that, of those who participated in the 6-month follow-up assessment, 19% ( $n =$   
48  
49 5) were “very much improved”, 31% ( $n = 8$ ) “much improved”, 38% ( $n = 10$ ) “minimally  
50  
51 improved”, 4% ( $n = 1$ ) “not changed” and 8% ( $n = 2$ ) “minimally worse”, compared to  
52  
53 baseline.  
54  
55  
56

### 57 **Post-hoc analyses**

1  
2  
3 The proportion of parents reporting that they had stayed home from work during the  
4  
5 last month due to their adolescent's health problems was 27% before treatment and  
6  
7 13% at 6-month follow-up. Of the adolescents, 50% had stayed home from school during  
8  
9 the last month due to health problems before treatment and 33% at 6-month follow-up.  
10  
11 At 6-month follow-up, six participants reported that they had received additional  
12  
13 treatment for social anxiety; two participants (7%) got CBT and four participants (13%)  
14  
15 had initiated or increased SSRI medication. All these participants fulfilled diagnostic  
16  
17 criteria for SAD at post treatment assessment and five out of six still fulfilled diagnostic  
18  
19 criteria for SAD at follow-up.  
20  
21

22  
23 Half of all participants ( $n=15$ ) reported that they had used strategies from the  
24  
25 treatment since post-treatment assessment, referring to exposure, coping strategies  
26  
27 (such as breathing exercises and focus shift) and cognitive techniques as the most  
28  
29 common ones.  
30  
31

### 32 33 **Adverse events**

34  
35 Seven adolescents (23%) reported having experienced some negative event during the  
36  
37 course of treatment. These events included increased stress due to the limited time to  
38  
39 work with treatment modules ( $n=4$ ; 13%), increased social anxiety ( $n=1$ ; 3%),  
40  
41 increased panic anxiety ( $n=1$ ; 3%) and increased depression and negative thoughts  
42  
43 ( $n=1$ ; 3%). Those who reported increased stress and anxiety associated these symptoms  
44  
45 with the first weeks of treatment and typically described a decrease as treatment  
46  
47 continued. Two adolescents reported that the negative event (increased negative  
48  
49 thoughts in one case and increased panic anxiety in the other case) still had some impact  
50  
51 on their wellbeing at the end of treatment.  
52  
53  
54  
55  
56  
57  
58  
59  
60

## DISCUSSION

To our knowledge this is the first study evaluating the feasibility and efficacy of therapist- and parent-guided, Internet-delivered cognitive behavioural therapy (ICBT), supplemented with group-exposure sessions, for adolescents with SAD. The results suggest that such a combined treatment format is both feasible and potentially efficacious and that the improvements are maintained at least 6 months beyond treatment termination. Feasibility was indicated by the high proportion of participants who reported satisfaction with the program, and who would recommend it to a peer, as well as by the high attendance rate at group-sessions and good completion of online-sessions. The results showed substantial reductions of social anxiety symptoms on all clinician-, adolescent- and parent-rated measures at post treatment, as well as improvements in secondary outcomes such as overall anxiety and level of functioning. These symptom reductions were maintained or further improved at the 6-month follow-up.

The adolescents completed on average nearly two thirds of the 9 online-modules which is more than in previous studies on ICBT for youth with SAD where participants completed less than half of the modules on average<sup>26 30</sup>. It is possible that the face-to-face component (group-based exposure sessions) in the present study influenced the working pace with the Internet-modules as participants were recommended to complete the preceding modules before attending group sessions. Even if completion of previous modules was not a prerequisite for attendance at group sessions, participants tended to complete them before attending the sessions. Participants also had peer and therapist support in the group on aspects of the Internet-delivered modules that they found difficult (e.g., designing an idiosyncratic exposure hierarchy), which might have led to more motivation to work with modules *after* group sessions. It has been proposed

1  
2  
3 that socially anxious children and adolescents have a tendency to avoid practicing skills  
4  
5 on their own that they have learned online, such as conducting in-vivo exposure<sup>30</sup>. It  
6  
7 could therefore be hypothesized that the group-sessions in this study enhanced the  
8  
9 participants' inclination to practice skills at home as a consequence of being offered  
10  
11 intensive therapist guidance and direct feedback during group-based exposure. A  
12  
13 majority of the participants completed a large number of online treatment modules and  
14  
15 group sessions, which gave them time to conduct a significant amount of exposure  
16  
17 (introduced in online module 3) and social skills training (introduced in group session 1  
18  
19 at week four). However, we did not track the number of completed exposure- and social  
20  
21 skills training exercises in other ways than by proxy, through measuring module  
22  
23 completion and group attendance.  
24  
25  
26

27  
28 Forty seven per cent of participants no longer met diagnostic criteria for SAD after  
29  
30 treatment, a proportion that further increased to 57% at 6-month follow-up. This is in  
31  
32 line with levels reported in studies evaluating face-to-face CBT for youth with SAD<sup>15 53</sup>  
33  
34<sup>59-61</sup> and higher than strictly Internet-delivered CBT for youth with SAD<sup>30</sup>. A recent trial  
35  
36 of ICBT for youth with SAD reported a relatively limited impact on the clinical diagnosis  
37  
38 of SAD (in the two active treatment conditions 12.8 and 14.6% at post-treatment and  
39  
40 29.8% and 35.4 % at 6-month follow-up, no longer met diagnostic criteria for SAD)<sup>30</sup>  
41  
42 and the authors suggest that stand-alone ICBT might not be enough for youth with  
43  
44 SAD<sup>30</sup>. It is tempting to attribute the better outcomes in our trial to the addition of  
45  
46 group-based exposure sessions to the ICBT protocol, though this hypothesis remains to  
47  
48 be formally evaluated. Discrepancies between our and previous results may also be  
49  
50 attributable to differences in study samples, study design or other methodological  
51  
52 aspects.  
53  
54  
55  
56  
57  
58  
59  
60

1  
2  
3 Therapists in this study spent less than 20 minutes per family and week, on the  
4  
5 Internet-delivered treatment, which is comparable to previous ICBT trials for youth<sup>21 22</sup>.  
6  
7 Although the group sessions added another 10 minutes per family and week in the  
8  
9 present trial, group-exposure supplemented ICBT should still be considered a time-  
10  
11 efficient intervention compared with face-to-face CBT where the therapist time per  
12  
13 family and week usually ranges from 45-60 minutes.  
14  
15

16  
17 Around a fifth of the participants reported a negative event during the course of the  
18  
19 treatment. Some of the events were expected, such as increased social anxiety when  
20  
21 exposure was initiated. Reports of increased stress were also associated with the first  
22  
23 weeks of the treatment and can be interpreted as an initial difficulty combining  
24  
25 treatment with other demands such as schoolwork. Two participants reported having  
26  
27 experienced some negative events that affected their wellbeing beyond the treatment  
28  
29 termination but these participants still benefited from treatment.  
30  
31

32  
33 Overall, the treatment seems feasible and possibly efficacious for adolescents with  
34  
35 SAD and their parents, but to be considered for implementation in regular care, an  
36  
37 intervention must also be feasible from an organizational point of view. A possible  
38  
39 drawback with the addition of group-exposure to ICBT is that it limits the flexibility of  
40  
41 the intervention. For instance, several patients must be recruited and able to commence  
42  
43 treatment at the same time. SAD is a challenging disorder to treat and interventions  
44  
45 aspiring to be effective may need to include direct and frequent therapist guidance. On  
46  
47 the other hand, development of new treatments should not only consider treatment  
48  
49 efficacy, but also accessibility, flexibility and cost effectiveness. A possible alternative to  
50  
51 group-based exposure sessions is to add other forms of direct communication between  
52  
53 patients and ICBT-therapists, e.g. video conferencing or equivalent, something that  
54  
55 future studies should investigate further.  
56  
57  
58  
59  
60

## Limitations

Although this feasibility trial has several strengths, some important limitations need to be considered when interpreting the results. Causal inferences of observed changes are not possible due to lack of a control condition. Thus, improvement could be an effect of non-specific factors such as the therapist attention or of the passage of time. However, SAD has been shown to commonly follow a chronic course when left untreated<sup>2</sup> and it is not likely that spontaneous remission would explain a significant part of the improvements in the study. Additionally, results were maintained and slightly improved at follow-up, indicating that treatment gains were stable over time, even after the attention from a therapist had ceased. A small proportion of the participants did seek additional care between post-treatment and 6-month follow-up, which could have affected the results. However, these participants continued to report high levels of social anxiety at follow-up, implying that additional care had limited impact on the long-term outcome. Although social anxiety is generally more common among women, the current sample had an overrepresentation of girls. The effect of gender on the results in this trial is unclear and may be further analyzed in future trials with larger samples.

Another limitation concerns assessment at post-treatment and follow-up. Although attempts to reduce bias were made by having these assessments conducted by clinicians not involved in the treatment, assessors were not blind to the fact that the participant had received treatment.

## Conclusions

This is the first study of therapist- and parent-guided ICBT supplemented with group-exposure for adolescents with SAD. The intervention was highly acceptable to the

1  
2  
3 families and significantly reduced social anxiety symptoms up to 6-month follow-up.  
4  
5 Participants were generally satisfied with the treatment and the completion-rate of  
6  
7 Internet-modules and attendance at group sessions were high, indicating that the  
8  
9 treatment is feasible and acceptable to the SAD youth population. Furthermore, per-  
10  
11 patient therapist time was limited, even considering the time spent on group-sessions;  
12  
13 thus, ICBT supplemented with group-based exposure sessions might be cost-effective  
14  
15 when compared to traditional face-to-face CBT. Further controlled trials are needed.  
16  
17  
18  
19  
20

21 **Acknowledgements** The authors would like to thank Ulrika Thulin for invaluable help with writing the  
22  
23 treatment modules, and Cornelia Hanqvist and Jon Juselius for assisting with providing the treatment.

24 **Contributors** The study was designed by MN, SV, DMC, ES and JH. MN was the project manager in  
25  
26 collaboration with JH. MN wrote the treatment modules and provided the treatment in collaboration  
27  
28 with JH and SV. All statistical analyses were conducted by JH and MN. MN drafted the manuscript in  
29  
30 collaboration with JH. The manuscript was reviewed and revised by SV, ES, DMC, BL and LGÖ. All  
31  
32 authors have read and approved the final manuscript.  
33

34 **Funding** This work was supported by the Stockholm County Council (PPG project 20150032; HSNV  
35  
36 140 99; HSN 1011-1176) and the Swedish Research Council and Swedish Research Council for  
37  
38 Health, Working Life and Welfare (Forte 2014-4052)

39 **Competing interests** None.

40  
41 **Data sharing statement** No additional data are available.  
42

43 **Open Access** This is an Open Access article distributed in accordance with the Creative Commons  
44  
45 Attribution Non Commercial (CC BY-NC 4.0) license, which permits others to distribute, remix, adapt,  
46  
47 build upon this work non-commercially, and license their derivative works on different terms, provided  
48  
49 the original work is properly cited and the use is non-commercial. See:

50 <http://creativecommons.org/licenses/by-nc/4.0/>  
51  
52  
53  
54  
55  
56  
57  
58  
59  
60



## References

1. Association AP. Diagnostic and statistical manual of mental disorders (DSM-5®): American Psychiatric Pub 2013.
2. Burstein M, He JP, Kattan G, et al. Social phobia and subtypes in the national comorbidity survey-adolescent supplement: prevalence, correlates, and comorbidity. *J Am Acad Child Adolesc Psychiatry* 2011;50(9):870-80. doi: 10.1016/j.jaac.2011.06.005
3. Lawrence D, Johnson S, Hafekost J, et al. The Mental Health of Children and Adolescents: Report on the Second Australian Child and Adolescent Survey of Mental Health and Wellbeing. 2015
4. Beesdo K, Bittner A, Pine DS, et al. Incidence of social anxiety disorder and the consistent risk for secondary depression in the first three decades of life. *Arch Gen Psychiatry* 2007;64(8):903-12.
5. Katzelnick DJ, Kobak KA, DeLeire T, et al. Impact of generalized social anxiety disorder in managed care. *Am J Psychiatry* 2001;158(12):1999-2007.
6. Buckner JD, Schmidt NB, Lang AR, et al. Specificity of social anxiety disorder as a risk factor for alcohol and cannabis dependence. *J Psychiatr Res* 2008;42(3):230-39.
7. Beidel DC, Turner SM, Morris TL. Psychopathology of childhood social phobia. *J Am Acad Child Adolesc Psychiatry* 1999;38(6):643-50. doi: 10.1097/00004583-199906000-00010
8. Acarturk C, Smit F, De Graaf R, et al. Economic costs of social phobia: a population-based study. *J Affect Disord* 2009;115(3):421-29.
9. Patel A, Knapp M, Henderson J, et al. The economic consequences of social phobia. *J Affect Disord* 2002;68(2):221-33.
10. Hofmann SG, Smits JA. Cognitive-behavioral therapy for adult anxiety disorders: a meta-analysis of randomized placebo-controlled trials. *J Clin Psychiatry* 2008;69(4):621.
11. Scaini S, Belotti R, Ogliari A, et al. A comprehensive meta-analysis of cognitive-behavioral interventions for social anxiety disorder in children and adolescents. *J Anxiety Disord* 2016;42:105-12. doi: 10.1016/j.janxdis.2016.05.008
12. Segool NK, Carlson JS. Efficacy of cognitive - behavioral and pharmacological treatments for children with social anxiety. *Depress Anxiety* 2008;25(7):620-31.
13. Pilling S, Mayo-Wilson E, Mavranouzouli I, et al. Recognition, assessment and treatment of social anxiety disorder: summary of NICE guidance. *BMJ* 2013;346:f2541.
14. Hudson JL, Rapee RM, Lyneham HJ, et al. Comparing outcomes for children with different anxiety disorders following cognitive behavioural therapy. *Behav Res Ther* 2015;72:30-37. doi: <http://dx.doi.org/10.1016/j.brat.2015.06.007>
15. Beidel DC, Turner SM, Morris TL. Behavioral treatment of childhood social phobia. *J Consult Clin Psychol* 2000;68(6):1072-80.
16. Beidel DC, Turner SM, Sallee FR, et al. SET-C versus fluoxetine in the treatment of childhood social phobia. *J Am Acad Child Adolesc Psychiatry* 2007;46(12):1622-32. doi: 10.1097/chi.0b013e318154bb57
17. Essau CA, Conradt J, Petermann F. Frequency and comorbidity of social phobia and social fears in adolescents. *Behav Res Ther* 1999;37(9):831-43.
18. Wittchen HU, Stein MB, Kessler RC. Social fears and social phobia in a community sample of adolescents and young adults: prevalence, risk factors and comorbidity. *Psychol Med* 1999;29(2):309-23. doi: 10.1017/s0033291798008174

19. Merikangas KR, He J-p, Burstein M, et al. Service utilization for lifetime mental disorders in US adolescents: Results of the National Comorbidity Survey-Adolescent Supplement (NCS-A). *J Am Acad Child Adolesc Psychiatry* 2011;50(1):32-45.
20. Hedman E, Andersson E, Ljotsson B, et al. Cost-effectiveness of Internet-based cognitive behavior therapy vs. cognitive behavioral group therapy for social anxiety disorder: results from a randomized controlled trial. *Behav Res Ther* 2011;49(11):729-36. doi: 10.1016/j.brat.2011.07.009
21. Lenhard F, Andersson E, Mataix-Cols D, et al. Therapist-Guided, Internet-Delivered Cognitive-Behavioral Therapy for Adolescents With Obsessive-Compulsive Disorder: A Randomized Controlled Trial. *J Am Acad Child Adolesc Psychiatry* 2017;56(1):10-19.e2. doi: 10.1016/j.jaac.2016.09.515
22. Lenhard F, Vigerland S, Andersson E, et al. Internet-delivered cognitive behavior therapy for adolescents with obsessive-compulsive disorder: an open trial. *PLoS One* 2014;9(6):e100773. doi: 10.1371/journal.pone.0100773
23. Hedman E, Ljótsson B, Lindefors N. Cognitive behavior therapy via the Internet: a systematic review of applications, clinical efficacy and cost-effectiveness. *Expert Rev Pharmacoecon Outcomes Res* 2012;12(6):745-64.
24. Hedman E, Andersson G, Ljotsson B, et al. Internet-based cognitive behavior therapy vs. cognitive behavioral group therapy for social anxiety disorder: a randomized controlled non-inferiority trial. *PLoS One* 2011;6(3):e18001. doi: 10.1371/journal.pone.0018001
25. March S, Spence SH, Donovan CL. The efficacy of an internet-based cognitive-behavioral therapy intervention for child anxiety disorders. *J Pediatr Psychol* 2009;34(5):474-87.
26. Tillfors M, Andersson G, Ekselius L, et al. A randomized trial of Internet-delivered treatment for social anxiety disorder in high school students. *Cogn Behav Ther* 2011;40(2):147-57. doi: 10.1080/16506073.2011.555486
27. Donovan CL, March S. Online CBT for preschool anxiety disorders: a randomised control trial. *Behav Res Ther* 2014;58:24-35.
28. Vigerland S, Ljótsson B, Thulin U, et al. Internet-delivered cognitive behavioural therapy for children with anxiety disorders: A randomised controlled trial. *Behav Res Ther* 2016;76:47-56.
29. Spence SH, Donovan CL, March S, et al. A randomized controlled trial of online versus clinic-based CBT for adolescent anxiety. *J Consult Clin Psychol* 2011;79(5):629-42. doi: 10.1037/a0024512
30. Spence SH, Donovan CL, March S, et al. Generic versus disorder specific cognitive behavior therapy for social anxiety disorder in youth: A randomized controlled trial using internet delivery. *Behav Res Ther* 2017;90:41-57. doi: 10.1016/j.brat.2016.12.003
31. Sethi S. Treating Youth Depression and Anxiety: A Randomised Controlled Trial Examining the Efficacy of Computerised versus Face-to-face Cognitive Behaviour Therapy. *Aust Psychol* 2013;48(4):249-57. doi: 10.1111/ap.12006
32. Sethi S, Campbell AJ, Ellis LA. The Use of Computerized Self-Help Packages to Treat Adolescent Depression and Anxiety. *Journal of Technology in Human Services* 2010;28(3):144-60. doi: 10.1080/15228835.2010.508317
33. Andersson G, Carlbring P, Holmström A, et al. Internet-Based Self-Help With Therapist Feedback and In Vivo Group Exposure for Social Phobia: A Randomized

- Controlled Trial. *J Consult Clin Psychol* 2006;74(4):677-86. doi: 10.1037/0022-006X.74.4.677
34. Mathiasen K, Andersen TE, Riper H, et al. Blended CBT versus face-to-face CBT: a randomised non-inferiority trial. *BMC Psychiatry* 2016;16(1):432. doi: 10.1186/s12888-016-1140-y
35. Guy W. Clinical global impression scale. *The ECDEU Assessment Manual for Psychopharmacology-Revised Volume DHEW Publ No ADM 1976*;76(338):218-22.
36. Sheehan DV, Lecrubier Y, Sheehan KH, et al. The Mini-International Neuropsychiatric Interview (M.I.N.I.): the development and validation of a structured diagnostic psychiatric interview for DSM-IV and ICD-10. *J Clin Psychiatry* 1998;59 Suppl 20:22-33;quiz 34-57.
37. Albano A, Silverman W. The Anxiety Disorders Interview Schedule for Children for DSM-IV: clinician manual (child and parent versions). *San Antonio, TX: Psychological Corporation* 1996
38. Shaffer D, Gould MS, Brasic J, et al. A children's global assessment scale (CGAS). *Arch Gen Psychiatry* 1983;40(11):1228-31.
39. Beidel DC, Turner SM, Morris TL. A new inventory to assess childhood social anxiety and phobia - the social phobia and anxiety inventory for children *Psychol Assess* 1995;7(1):73-79. doi: 10.1037/1040-3590.7.1.73
40. Clark DM, Ehlers A, McManus F, et al. Cognitive therapy versus fluoxetine in generalized social phobia: a randomized placebo-controlled trial. *J Consult Clin Psychol* 2003;71(6):1058.
41. Hedman E, Mörtberg E, Hesser H, et al. Mediators in psychological treatment of social anxiety disorder: Individual cognitive therapy compared to cognitive behavioral group therapy. *Behav Res Ther* 2013;51(10):696-705.
42. Chorpita BF, Yim L, Moffitt C, et al. Assessment of symptoms of DSM-IV anxiety and depression in children: a revised child anxiety and depression scale. *Behav Res Ther* 2000;38(8):835-55.
43. Mundt JC, Marks IM, Shear MK, et al. The Work and Social Adjustment Scale: a simple measure of impairment in functioning. *Br J Psychiatry* 2002;180:461-4.
44. Mataix-Cols D, Cowley AJ, Hankins M, et al. Reliability and validity of the Work and Social Adjustment Scale in phobic disorders. *Compr Psychiatry* 2005;46(3):223-28.
45. Ravens-Sieberer U, Gosch A, Rajmil L, et al. KIDSCREEN-52 quality-of-life measure for children and adolescents. *Expert Rev Pharmacoecon Outcomes Res* 2005;5(3):353-64.
46. Bouwmans C, De Jong K, Timman R, et al. Feasibility, reliability and validity of a questionnaire on healthcare consumption and productivity loss in patients with a psychiatric disorder (TiC-P). *BMC Health Serv Res* 2013;13(1):1.
47. Venkatesh V, Morris MG, Davis GB, et al. User acceptance of information technology: Toward a unified view. *MIS quarterly* 2003:425-78.
48. Bonnert M, Olen O, Lalouni M, et al. Internet-Delivered Cognitive Behavior Therapy for Adolescents With Irritable Bowel Syndrome: A Randomized Controlled Trial. *Am J Gastroenterol* 2016 doi: 10.1038/ajg.2016.503
49. Lenhard F, Vigerland S, Andersson E, et al. Internet-delivered cognitive behavior therapy for adolescents with obsessive-compulsive disorder: an open trial. *PLoS One* 2014;9(6):e100773.

- 1  
2  
3 50. Vigerland S, Thulin U, Ljotsson B, et al. Internet-delivered CBT for children with  
4 specific phobia: a pilot study. *Cogn Behav Ther* 2013;42(4):303-14. doi:  
5 10.1080/16506073.2013.844201  
6  
7 51. Rapee RM, Heimberg RG. A cognitive-behavioral model of anxiety in social phobia.  
8 *Behav Res Ther* 1997;35(8):741-56.  
9  
10 52. Clark DM, Wells A. A cognitive model of social phobia. *Social phobia: Diagnosis,*  
11 *assessment, and treatment* 1995;41(68):00022-3.  
12  
13 53. Albano AM, Marten PA, Holt CS, et al. Cognitive-Behavioral Group Treatment for  
14 Social Phobia in Adolescents A Preliminary Study. *J Nerv Ment Dis*  
15 1995;183(10):649-56.  
16  
17 54. Albano AM, DiBartolo PM. *Cognitive-Behavioral Therapy for Social Phobia in*  
18 *Adolescents: Stand Up, Speak Out Therapist Guide: Oxford University Press* 2007.  
19  
20 55. Cohen J. A coefficient of agreement for nominal scales. *Educational and Psychosocial*  
21 *Measurement*, 20, 37-46, 1960.  
22  
23 56. Mannuzza S, Fyer AJ, Martin LY, et al. Reliability of anxiety assessment. I. Diagnostic  
24 agreement. *Arch Gen Psychiatry* 1989;46(12):1093-101.  
25  
26 57. Gueorguieva R, Krystal JH. Move over ANOVA: progress in analyzing repeated-  
27 measures data and its reflection in papers published in the Archives of General  
28 Psychiatry. *Arch Gen Psychiatry* 2004;61(3):310-7. doi:  
29 10.1001/archpsyc.61.3.310  
30  
31 58. Cohen J. A power primer. *Psychol Bull* 1992;112(1):155.  
32  
33 59. Hayward C, Varady S, Albano AM, et al. Cognitive-behavioral group therapy for social  
34 phobia in female adolescents: results of a pilot study. *J Am Acad Child Adolesc*  
35 *Psychiatry* 2000;39(6):721-26.  
36  
37 60. Spence SH, Donovan C, Brechman - Toussaint M. The treatment of childhood social  
38 phobia: The effectiveness of a social skills training - based, cognitive -  
39 behavioural intervention, with and without parental involvement. *J Child Psychol*  
40 *Psychiatry* 2000;41(6):713-26.  
41  
42 61. Öst L-G, Cederlund R, Reuterskiöld L. Behavioral treatment of social phobia in youth:  
43 Does parent education training improve the outcome? *Behav Res Ther*  
44 2015;67:19-29.  
45  
46  
47  
48  
49  
50  
51  
52  
53  
54  
55  
56  
57  
58  
59  
60

Table 1. Demographic and clinical features of study participants (N = 30)

| Variables                                                                                                                        |                                           | N          | %    |
|----------------------------------------------------------------------------------------------------------------------------------|-------------------------------------------|------------|------|
| <b>Age (years)</b>                                                                                                               | <i>M (SD)</i>                             | 15 (1.22)  |      |
|                                                                                                                                  | min-max                                   | 13-17      |      |
| <b>Gender</b>                                                                                                                    | Girls                                     | 25         | 83   |
|                                                                                                                                  | Boys                                      | 5          | 17   |
| <b>Country of birth, adolescent</b>                                                                                              | Sweden                                    | 29         | 97   |
|                                                                                                                                  | Other                                     | 1          | 3    |
| <b>Country of birth, parents</b>                                                                                                 | Both in Sweden                            | 20         | 67   |
|                                                                                                                                  | One in Sweden                             | 7          | 23   |
|                                                                                                                                  | None in Sweden                            | 3          | 10   |
| <b>Education, responding parent</b>                                                                                              | Primary                                   | 14         | 47   |
|                                                                                                                                  | Higher                                    | 16         | 53   |
| <b>Employment, responding parent</b>                                                                                             | Working                                   | 25         | 83   |
|                                                                                                                                  | Unemployed                                | 4          | 13   |
|                                                                                                                                  | Retired                                   | 1          | 3    |
| <b>Psychotropic medication pre-treatment</b>                                                                                     | None                                      | 27         | 90   |
|                                                                                                                                  | SSRI                                      | 3          | 10   |
| <b>Prior psychological treatment</b>                                                                                             | None                                      | 11         | 37   |
|                                                                                                                                  | Primary care, counseling or equivalent    | 4          | 13   |
|                                                                                                                                  | Psychiatric specialist care or equivalent | 14         | 47   |
| <b>Referred from child health services</b>                                                                                       |                                           | 6          | 20   |
| <b>Comorbid diagnoses</b>                                                                                                        | Specific Phobia                           | 8          | 26.7 |
|                                                                                                                                  | GAD                                       | 5          | 16.7 |
|                                                                                                                                  | ADD                                       | 3          | 10   |
|                                                                                                                                  | Depression                                | 2          | 6.7  |
|                                                                                                                                  | OCD                                       | 2          | 6.7  |
|                                                                                                                                  | Panic disorder                            | 1          | 3.3  |
|                                                                                                                                  | Tics/Tourette                             | 1          | 3.3  |
|                                                                                                                                  | Separation anxiety                        | 1          | 3.3  |
|                                                                                                                                  | Trichotillomania                          | 1          | 3.3  |
| <b>Frequency of comorbid diagnoses</b>                                                                                           | None                                      | 13         | 43.3 |
|                                                                                                                                  | One                                       | 11         | 36.7 |
|                                                                                                                                  | Two                                       | 3          | 10   |
|                                                                                                                                  | Three or more                             | 3          | 10   |
| <b>Onset (age in years)</b>                                                                                                      | <i>M (SD)</i>                             | 8.9 (4.29) |      |
| <b>Duration of SAD (years)</b>                                                                                                   | <i>M (SD)</i>                             | 6.2 (4.05) |      |
| <b>Note: Primary education ≤12. Higher education &gt;12 years.</b>                                                               |                                           |            |      |
| <b>Abbreviations: GAD = generalized anxiety disorder; ADD = attention deficit disorder; OCD = obsessive compulsive disorder.</b> |                                           |            |      |

**Table 2. An overview of the content of the ICBT protocol and group-exposure sessions**

| Chapter | Adolescent                                                                                                                         | Parent                                                                                                                                             | Group-exposure sessions                                                                                                                                                                  |
|---------|------------------------------------------------------------------------------------------------------------------------------------|----------------------------------------------------------------------------------------------------------------------------------------------------|------------------------------------------------------------------------------------------------------------------------------------------------------------------------------------------|
| 1       | Introduction to ICBT, Learn about emotions, fear and social anxiety. How to do functional analyses of my own behavior              | Introduction to ICBT. Learn about emotions, fear and social anxiety. How to do functional analyses of my teenager's behavior and my own reactions. |                                                                                                                                                                                          |
| 2       | More about social anxiety disorder. Learn to reduce self-focus and safety behaviors. Improve coping strategies.                    | Suggest treatment goals. Plan the treatment. Learn about exposure and how to be a co-therapist during exposure.                                    |                                                                                                                                                                                          |
| 3       | Map the social anxiety. Learn about exposure to social situations. Set treatment goals and build an individual exposure hierarchy. | Learn about common parental challenges. How to reward my adolescent. Problem solving.                                                              |                                                                                                                                                                                          |
| 4       |                                                                                                                                    | How to handle negative thoughts. Learn about social skills.                                                                                        | Modelling and practice of social skills. Modelling and mapping of safety behaviors and how to reduce them. Set an individual exposure hierarchy. Exposure in vivo. Summary with parents. |
| 5       | Exposure follow-up. Learn about negative thoughts and how to handle them.                                                          | Prepare relapse prevention. Evaluation of parent modules and treatment.                                                                            |                                                                                                                                                                                          |
| 6       |                                                                                                                                    |                                                                                                                                                    | Repetition of treatment components. Exposure in vivo. Summary with parents.                                                                                                              |
| 7       | Exposure follow-up. Extended practice of focus shift.                                                                              |                                                                                                                                                    |                                                                                                                                                                                          |
| 8       | Exposure follow-up. Negative thoughts follow-up. Problem solving.                                                                  |                                                                                                                                                    |                                                                                                                                                                                          |
| 9       | Exposure follow-up. Learn how to say no and other self-assertive behaviors.                                                        |                                                                                                                                                    |                                                                                                                                                                                          |
| 10      |                                                                                                                                    |                                                                                                                                                    | Exposure in vivo. Social mishaps in public environment. Summary with parents.                                                                                                            |
| 11      | Exposure follow-up. Last sprint: how to get the most out of the last exposures.                                                    |                                                                                                                                                    |                                                                                                                                                                                          |
| 12      | Make a plan for relapse prevention. What did I learn? What do I want to practice further? Make an evaluation of the treatment.     |                                                                                                                                                    |                                                                                                                                                                                          |

Table 3 Means, standard deviations, pre- to post and post to 6-month follow-up comparisons, and effect sizes of all outcome measures

| Measure                                      | Pre  |       | Post |       | Pre to post comparison |                   | 6-month follow-up |       | Post to follow-up comparison |                    |
|----------------------------------------------|------|-------|------|-------|------------------------|-------------------|-------------------|-------|------------------------------|--------------------|
|                                              | M    | SD    | M    | SD    | p                      | d (95% CI)        | M                 | SD    | p                            | d (95%CI)          |
| <i>Clinician-rated</i>                       |      |       |      |       |                        |                   |                   |       |                              |                    |
| CGI-S                                        | 4.6  | 0.72  | 3.3  | 1.3   | <.001                  | 1.17 (0.61, 1.72) | 3.0               | 1.43  | .015                         | 0.22 (-0.01, 0.45) |
| C-GAS                                        | 55.5 | 6.68  | 62.0 | 8.85  | <.001                  | 0.80 (0.40, 1.21) | 65.4              | 11.14 | <.001                        | 0.30 (0.13, 0.46)  |
| <i>Self- and parent rated social anxiety</i> |      |       |      |       |                        |                   |                   |       |                              |                    |
| SPAI-C                                       | 33.4 | 9.32  | 24.5 | 11.31 | <.001                  | 0.85 (0.36, 1.34) | 21.5              | 11.24 | .023                         | 0.27 (0.02, 0.51)  |
| SPAI-P                                       | 35.3 | 8.46  | 27.2 | 11.55 | <.001                  | 0.79 (0.29, 1.28) | 25.7              | 11.01 | n.s.                         |                    |
| SPWSS avoid                                  | 4.0  | 2.38  | 1.9  | 2.22  | <.001                  | 0.91 (0.36, 1.47) | 1.8               | 1.81  | <.001                        | 0.05 (-0.4, 0.5)   |
| SPWSS s-f                                    | 4.9  | 1.74  | 2.8  | 1.44  | <.001                  | 1.31 (0.61, 2.02) | 3.3               | 2.03  | <.001                        | -0.28 (-0.83-0.26) |
| SPWSS a a                                    | 4.9  | 1.85  | 3.0  | 2.19  | <.001                  | 0.94 (0.32, 1.55) | 2.4               | 1.92  | <.001                        | 0.29 (-0.18-0.76)  |
| SPWSS pep                                    | 4.8  | 2.29  | 3.6  | 1.77  | <.001                  | 0.58 (0.02-1.15)  | 3.3               | 2.30  | <.001                        | 0.14 (-0.36-0.65)  |
| <i>Other self- and parent rated measures</i> |      |       |      |       |                        |                   |                   |       |                              |                    |
| RCADS-C SAD                                  | 18.5 | 5.69  | 14.2 | 5.87  | <.001                  | 0.74 (0.36, 1.13) | 12.4              | 6.16  | .018                         | 0.30(0.05, 0.55)   |
| RCADS-P SAD                                  | 16.4 | 5.88  | 13.2 | 5.70  | .006                   | 0.55 (0.09, 1.01) | 12.3              | 6.07  | n.s.                         |                    |
| RCADS-C                                      | 60.0 | 24.77 | 42.1 | 21.74 | <.001                  | 0.76 (0.32, 1.21) | 38.4              | 25.92 | n.s.                         |                    |
| RCADS-P                                      | 46.2 | 23.39 | 35.2 | 19.13 | .005                   | 0.51 (0.11, 0.91) | 31.8              | 22.31 | n.s.                         |                    |
| KIDSCREEN-C                                  | 32.2 | 5.59  | 34.1 | 6.07  | .036                   | 0.32 (0.06, 0.59) | 35.7              | 6.93  | n.s.                         |                    |
| KIDSCREEN-P                                  | 33.1 | 4.50  | 35.5 | 5.98  | .025                   | 0.44 (0.06, 0.82) | 35.8              | 5.85  | n.s.                         |                    |
| EWSAS-C                                      | 15.0 | 7.47  | 10.9 | 6.69  | .006                   | 0.58 (0.14, 1.01) | 7.8               | 5.28  | .004                         | 0.50 (0.1, 0.91)   |
| EWSAS-P                                      | 14.6 | 6.51  | 11.4 | 6.88  | .002                   | 0.48 (0.13, 0.83) | 9.1               | 7.44  | .002                         | 0.31 (0.1, 0.54)   |

Abbreviations: CGI-S = The Clinical Global Impression – Severity, C-GAS = Children’s Global Assessment Scale, SPAI-C/P = Social Phobia and Anxiety Inventory - Child and Parent Version, SPWSS = The Social Phobia Weekly Summary Scale, SPWSS avoid = avoidance, s-f = self-focus, a.a = anticipatory anxiety, pep = post event-processing, RCADS-C/P = The Revised Children Anxiety And Depression Scale – Child and Parent Version, RCADS-C/P SAD = The Revised Children Anxiety And Depression Scale – Child and Parent Version, SAD subscale, KIDSCREEN-C/P = The Health related quality of life questionnaire for children, adolescents and their parents, EWSAS-C/P = The Education, Work and Social Adjustment Scale – Child and Parent Version

1  
2  
3  
4  
5  
6  
7  
8  
9  
10  
11  
12  
13  
14  
15  
16  
17  
18  
19  
20  
21  
22  
23  
24  
25  
26  
27  
28  
29  
30  
31  
32  
33  
34  
35  
36  
37  
38  
39  
40  
41  
42  
43  
44  
45  
46  
47  
48  
49

For peer review only



1  
2  
3  
4  
5 Figure 1. Study flow chart  
6

7 Figure 2. Adolescents' evaluation of BIP SOFT  
8  
9  
10  
11  
12  
13  
14  
15  
16  
17  
18  
19  
20  
21  
22  
23  
24  
25  
26  
27  
28  
29  
30  
31  
32  
33  
34  
35  
36  
37  
38  
39  
40  
41  
42  
43  
44  
45

For peer review only

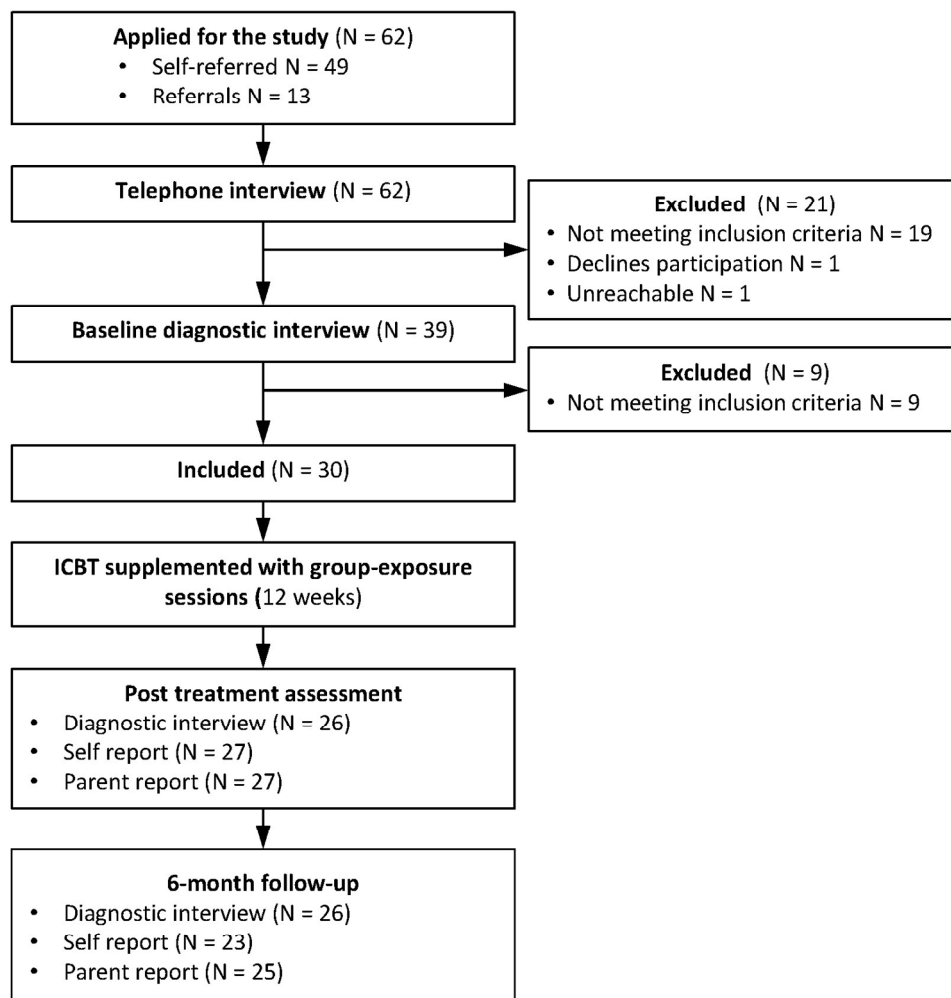

Figure 1. Study flow chart

143x149mm (300 x 300 DPI)



1  
2  
3  
4  
5  
6  
7  
8  
9  
10  
11  
12  
13  
14  
15  
16  
17  
18  
19  
20  
21  
22  
23  
24  
25  
26  
27  
28  
29  
30  
31  
32  
33  
34  
35  
36  
37  
38  
39  
40  
41  
42  
43  
44  
45  
46  
47  
48  
49  
50  
51  
52  
53  
54  
55  
56  
57  
58  
59  
60



Figure 2. Adolescents' evaluation of BIP SOFT

112x64mm (300 x 300 DPI)

review only

1  
2  
3  
4  
5  
6  
7  
8  
9  
10  
11  
12  
13  
14  
15  
16  
17  
18  
19  
20  
21  
22  
23  
24  
25  
26  
27  
28  
29  
30  
31  
32  
33  
34  
35  
36  
37  
38  
39  
40  
41  
42  
43  
44  
45  
46  
47  
48  
49

| Section/topic and item No  | Standard checklist item                                                                                                 | Extension for pilot trials                                                                                                                          | Page No where item is reported |
|----------------------------|-------------------------------------------------------------------------------------------------------------------------|-----------------------------------------------------------------------------------------------------------------------------------------------------|--------------------------------|
| Title and abstract         |                                                                                                                         |                                                                                                                                                     |                                |
| 1a                         | Identification as a randomised trial in the title                                                                       | Identification as a pilot or feasibility randomised trial in the title                                                                              | 1                              |
| 1b                         | Structured summary of trial design, methods, results, and conclusions (for specific guidance see CONSORT for abstracts) | Structured summary of pilot trial design, methods, results, and conclusions (for specific guidance see CONSORT abstract extension for pilot trials) | 2-3                            |
| Introduction               |                                                                                                                         |                                                                                                                                                     |                                |
| Background and objectives: |                                                                                                                         |                                                                                                                                                     |                                |
| 2a                         | Scientific background and explanation of rationale                                                                      | Scientific background and explanation of rationale for future definitive trial, and reasons for randomised pilot trial                              | 3-5                            |
| 2b                         | Specific objectives or hypotheses                                                                                       | Specific objectives or research questions for pilot trial                                                                                           | 5                              |
| Methods                    |                                                                                                                         |                                                                                                                                                     |                                |
| Trial design:              |                                                                                                                         |                                                                                                                                                     |                                |

| Section/topic and item No | Standard checklist item                                                                                                               | Extension for pilot trials                                                                               | Page No where item is reported |
|---------------------------|---------------------------------------------------------------------------------------------------------------------------------------|----------------------------------------------------------------------------------------------------------|--------------------------------|
| 3a                        | Description of trial design (such as parallel, factorial) including allocation ratio                                                  | Description of pilot trial design (such as parallel, factorial) including allocation ratio               | 2                              |
| 3b                        | Important changes to methods after trial commencement (such as eligibility criteria), with reasons                                    | Important changes to methods after pilot trial commencement (such as eligibility criteria), with reasons | NA                             |
| Participants:             |                                                                                                                                       |                                                                                                          |                                |
| 4a                        | Eligibility criteria for participants                                                                                                 |                                                                                                          | 5-6                            |
| 4b                        | Settings and locations where the data were collected                                                                                  |                                                                                                          | 5                              |
| 4c                        |                                                                                                                                       | How participants were identified and consented                                                           | 6,9                            |
| Interventions:            |                                                                                                                                       |                                                                                                          |                                |
| 5                         | The interventions for each group with sufficient details to allow replication, including how and when they were actually administered |                                                                                                          | 10-11                          |
| Outcomes:                 |                                                                                                                                       |                                                                                                          |                                |

1  
2  
3  
4  
5  
6  
7  
8  
9  
10  
11  
12  
13  
14  
15  
16  
17  
18  
19  
20  
21  
22  
23  
24  
25  
26  
27  
28  
29  
30  
31  
32  
33  
34  
35  
36  
37  
38  
39  
40  
41  
42  
43  
44  
45  
46  
47  
48  
49

| Section/topic and item No | Standard checklist item                                                                                           | Extension for pilot trials                                                                                                                                   | Page No where item is reported |
|---------------------------|-------------------------------------------------------------------------------------------------------------------|--------------------------------------------------------------------------------------------------------------------------------------------------------------|--------------------------------|
| 6a                        | Completely defined prespecified primary and secondary outcome measures, including how and when they were assessed | Completely defined prespecified assessments or measurements to address each pilot trial objective specified in 2b, including how and when they were assessed | 6-9                            |
| 6b                        | Any changes to trial outcomes after the trial commenced, with reasons                                             | Any changes to pilot trial assessments or measurements after the pilot trial commenced, with reasons                                                         | NA                             |
| 6c                        |                                                                                                                   | If applicable, prespecified criteria used to judge whether, or how, to proceed with future definitive trial                                                  | NA                             |
| Sample size:              |                                                                                                                   |                                                                                                                                                              |                                |
| 7a                        | How sample size was determined                                                                                    | Rationale for numbers in the pilot trial                                                                                                                     | 6                              |
| 7b                        | When applicable, explanation of any interim analyses and stopping guidelines                                      |                                                                                                                                                              | NA                             |
| Randomisation:            |                                                                                                                   |                                                                                                                                                              |                                |

| Section/topic and item No         | Standard checklist item                                                                                                                                                                     | Extension for pilot trials                                                             | Page No where item is reported |
|-----------------------------------|---------------------------------------------------------------------------------------------------------------------------------------------------------------------------------------------|----------------------------------------------------------------------------------------|--------------------------------|
| Sequence generation:              |                                                                                                                                                                                             |                                                                                        |                                |
| 8a                                | Method used to generate the random allocation sequence                                                                                                                                      |                                                                                        | NA                             |
| 8b                                | Type of randomisation; details of any restriction (such as blocking and block size)                                                                                                         | Type of randomisation(s); details of any restriction (such as blocking and block size) | NA                             |
| Allocation concealment mechanism: |                                                                                                                                                                                             |                                                                                        |                                |
| 9                                 | Mechanism used to implement the random allocation sequence (such as sequentially numbered containers), describing any steps taken to conceal the sequence until interventions were assigned |                                                                                        | NA                             |
| Implementation:                   |                                                                                                                                                                                             |                                                                                        |                                |
| 10                                | Who generated the random allocation sequence, enrolled participants, and assigned participants to interventions                                                                             |                                                                                        | NA                             |
| Blinding:                         |                                                                                                                                                                                             |                                                                                        |                                |

1  
2  
3  
4  
5  
6  
7  
8  
9  
10  
11  
12  
13  
14  
15  
16  
17  
18  
19  
20  
21  
22  
23  
24  
25  
26  
27  
28  
29  
30  
31  
32  
33  
34  
35  
36  
37  
38  
39  
40  
41  
42  
43  
44  
45  
46  
47  
48  
49

| Section/topic and item No                             | Standard checklist item                                                                                                         | Extension for pilot trials                                                                                                   | Page No where item is reported |
|-------------------------------------------------------|---------------------------------------------------------------------------------------------------------------------------------|------------------------------------------------------------------------------------------------------------------------------|--------------------------------|
| 11a                                                   | If done, who was blinded after assignment to interventions (eg, participants, care providers, those assessing outcomes) and how |                                                                                                                              | NA                             |
| 11b                                                   | If relevant, description of the similarity of interventions                                                                     |                                                                                                                              | NA                             |
| Analytical methods:                                   |                                                                                                                                 |                                                                                                                              |                                |
| 12a                                                   | Statistical methods used to compare groups for primary and secondary outcomes                                                   | Methods used to address each pilot trial objective whether qualitative or quantitative                                       | 12                             |
| 12b                                                   | Methods for additional analyses, such as subgroup analyses and adjusted analyses                                                | Not applicable                                                                                                               | NA                             |
| Results                                               |                                                                                                                                 |                                                                                                                              |                                |
| Participant flow (a diagram is strongly recommended): |                                                                                                                                 |                                                                                                                              |                                |
| 13a                                                   | For each group, the numbers of participants who were randomly assigned, received intended treatment, and were analysed for the  | For each group, the numbers of participants who were approached and/or assessed for eligibility, randomly assigned, received | 10                             |



| Section/topic and item No | Standard checklist item                                                                        | Extension for pilot trials                                                                             | Page No where item is reported |
|---------------------------|------------------------------------------------------------------------------------------------|--------------------------------------------------------------------------------------------------------|--------------------------------|
|                           | primary outcome                                                                                | intended treatment, and were assessed for each objective                                               |                                |
| 13b                       | For each group, losses and exclusions after randomisation, together with reasons               |                                                                                                        | NA                             |
| Recruitment:              |                                                                                                |                                                                                                        |                                |
| 14a                       | Dates defining the periods of recruitment and follow-up                                        |                                                                                                        | 5                              |
| 14b                       | Why the trial ended or was stopped                                                             | Why the pilot trial ended or was stopped                                                               | NA                             |
| Baseline data:            |                                                                                                |                                                                                                        |                                |
| 15                        | A table showing baseline demographic and clinical characteristics for each group               |                                                                                                        | 6                              |
| Numbers analysed:         |                                                                                                |                                                                                                        |                                |
| 16                        | For each group, number of participants (denominator) included in each analysis and whether the | For each objective, number of participants (denominator) included in each analysis. If relevant, these | 12                             |

1  
2  
3  
4  
5  
6  
7  
8  
9  
10  
11  
12  
13  
14  
15  
16  
17  
18  
19  
20  
21  
22  
23  
24  
25  
26  
27  
28  
29  
30  
31  
32  
33  
34  
35  
36  
37  
38  
39  
40  
41  
42  
43  
44  
45  
46  
47  
48  
49

| Section/topic and item No | Standard checklist item                                                                                                                           | Extension for pilot trials                                                                                                                                                     | Page No where item is reported |
|---------------------------|---------------------------------------------------------------------------------------------------------------------------------------------------|--------------------------------------------------------------------------------------------------------------------------------------------------------------------------------|--------------------------------|
|                           | analysis was by original assigned groups                                                                                                          | numbers should be by randomised group                                                                                                                                          |                                |
| Outcomes and estimation:  |                                                                                                                                                   |                                                                                                                                                                                |                                |
| 17a                       | For each primary and secondary outcome, results for each group, and the estimated effect size and its precision (such as 95% confidence interval) | For each objective, results including expressions of uncertainty (such as 95% confidence interval) for any estimates. If relevant, these results should be by randomised group | 27                             |
| 17b                       | For binary outcomes, presentation of both absolute and relative effect sizes is recommended                                                       | Not applicable                                                                                                                                                                 | NA                             |
| Ancillary analyses:       |                                                                                                                                                   |                                                                                                                                                                                |                                |
| 18                        | Results of any other analyses performed, including subgroup analyses and adjusted analyses, distinguishing prespecified from exploratory          | Results of any other analyses performed that could be used to inform the future definitive trial                                                                               | 15                             |
| Harms:                    |                                                                                                                                                   |                                                                                                                                                                                |                                |
| 19                        | All important harms or unintended                                                                                                                 |                                                                                                                                                                                | 16                             |

| Section/topic and item No | Standard checklist item                                                                                          | Extension for pilot trials                                                                                        | Page No where item is reported |
|---------------------------|------------------------------------------------------------------------------------------------------------------|-------------------------------------------------------------------------------------------------------------------|--------------------------------|
|                           | effects in each group (for specific guidance see CONSORT for harms)                                              |                                                                                                                   |                                |
| 19a                       |                                                                                                                  | If relevant, other important unintended consequences                                                              | NA                             |
| Discussion                |                                                                                                                  |                                                                                                                   |                                |
| Limitations:              |                                                                                                                  |                                                                                                                   |                                |
| 20                        | Trial limitations, addressing sources of potential bias, imprecision, and, if relevant, multiplicity of analyses | Pilot trial limitations, addressing sources of potential bias and remaining uncertainty about feasibility         | 19                             |
| Generalisability:         |                                                                                                                  |                                                                                                                   |                                |
| 21                        | Generalisability (external validity, applicability) of the trial findings                                        | Generalisability (applicability) of pilot trial methods and findings to future definitive trial and other studies | 19                             |
| Interpretation:           |                                                                                                                  |                                                                                                                   |                                |
| 22                        | Interpretation consistent with results, balancing benefits and harms, and                                        | Interpretation consistent with pilot trial objectives and findings,                                               | 20                             |

1  
2  
3  
4  
5  
6  
7  
8  
9  
10  
11  
12  
13  
14  
15  
16  
17  
18  
19  
20  
21  
22  
23  
24  
25  
26  
27  
28  
29  
30  
31  
32  
33  
34  
35  
36  
37  
38  
39  
40  
41  
42  
43  
44  
45  
46  
47  
48  
49

| Section/topic and item No | Standard checklist item                                                         | Extension for pilot trials                                                                            | Page No where item is reported |
|---------------------------|---------------------------------------------------------------------------------|-------------------------------------------------------------------------------------------------------|--------------------------------|
|                           | considering other relevant evidence                                             | balancing potential benefits and harms, and considering other relevant evidence                       |                                |
| 22a                       |                                                                                 | Implications for progression from pilot to future definitive trial, including any proposed amendments | 18-19                          |
| Other information         |                                                                                 |                                                                                                       |                                |
| Registration:             |                                                                                 |                                                                                                       |                                |
| 23                        | Registration number and name of trial registry                                  | Registration number for pilot trial and name of trial registry                                        | 3                              |
| Protocol:                 |                                                                                 |                                                                                                       |                                |
| 24                        | Where the full trial protocol can be accessed, if available                     | Where the pilot trial protocol can be accessed, if available                                          | NA                             |
| Funding:                  |                                                                                 |                                                                                                       |                                |
| 25                        | Sources of funding and other support (such as supply of drugs), role of funders |                                                                                                       | 20                             |
| 26                        |                                                                                 | Ethical approval or approval by                                                                       | 5                              |

| Section/topic and item No | Standard checklist item | Extension for pilot trials                                 | Page No where item is reported |
|---------------------------|-------------------------|------------------------------------------------------------|--------------------------------|
|                           |                         | research review committee, confirmed with reference number |                                |

For peer review only
